# Supplementary material for: Pattern measures of sedentary behaviour in adults: A literature review
Source: PubMed Central journal article supplement — Digit Health. 2020 Feb 10;6:2055207620905418. doi: 10.1177/2055207620905418 (PMC7013117; doi:10.1177/2055207620905418), 2020-02-10
Supplement: DHJ905418_Supplemental_Material1.pdf [file DHJ905418_Supplemental_Material1.pdf]

## Pattern measures of sedentary behavior in adults: A literature review.

### Additional file 1. Search Strategy

Search conducted at 8 June 2016.

#### 1. SCOPUS

((TITLE ("sedentary behavior" OR "sedentary pattern" OR "sitting behavior" OR "sedentary bout" OR "sedentary variable" OR "sedentary time" OR "sedentary lifestyle" OR (("physical activity" OR "physical inactivity") AND (pattern OR bout)) OR "physical activity level" OR "free-living behaviour" OR "physical behaviour" OR "activity pattern")) AND (TITLE-ABS-KEY(sensor\* OR acceleromet\* OR inclinomet\* OR pedomet\* OR actigraph OR activpal OR directlife OR actical OR promote OR fitbit OR dynaport OR geneactive OR actometer OR GT1M OR GT3X OR stepcount))) AND (TITLE-ABS-KEY(objectiv\* OR monitor\* OR measur\* OR assess\* OR determine OR defin\* OR classific\* OR pattern OR bout OR qualific\* OR accumul\* OR accrue\*)) AND (PUBYEAR > 1989) AND NOT TITLE(child\* OR adolesc\* OR boy\* OR girl\*) AND NOT TITLE(question\* OR interview) AND (LIMIT-TO(LANGUAGE, "English")) AND (LIMIT-TO(LANGUAGE, "English")) AND (EXCLUDE(DOCTYPE, "re"))

#### 2. ISI Web of Knowledge

##### TITLE

"sedentary behavior" OR "sedentary pattern" OR "sitting behavior" OR "sedentary bout" OR "sedentary variable" OR "sedentary time" OR "sedentary lifestyle" OR "physical activity" OR "physical inactivity"

AND

##### TITLE

pattern OR bout OR "physical activity level" OR "free-living behaviour" OR "physical behaviour" OR "activity pattern"

AND

##### TOPIC

sensor\* OR acceleromet\* OR inclinomet\* OR pedomet\* OR actigraph OR activpal OR directlife OR actical OR promote OR fitbit OR dynaport OR geneactive OR actometer OR GT1M OR GT3X OR stepcount

AND

**TOPIC:** objectiv\* OR monitor\* OR measur\* OR assess\* OR determine OR defin\* OR classific\* OR pattern OR bout OR qualific\* OR accumul\* OR accrue\*

NOT

**TITLE:** child\* OR adolesc\* OR boy\* OR girl\*

NOT

**TOPIC:** question\* OR interview

**Refined by:** [excluding] **DOCUMENT TYPES:** ( REVIEW ) AND **LANGUAGES:** ( ENGLISH )

**Timespan:** 1989-2016.

Search language=Auto
