# Supplementary material for: Pattern measures of sedentary behaviour in adults: A literature review
Source: PubMed Central journal article supplement — Digit Health. 2020 Feb 10;6:2055207620905418. doi: 10.1177/2055207620905418 (PMC7013117; doi:10.1177/2055207620905418), 2020-02-10
Supplement: DHJ905418_Supplemental_Material2.pdf [file DHJ905418_Supplemental_Material2.pdf]

## Pattern measures of sedentary behavior in adults: A literature review.

### Additional file 2. Results table

- Table 1 Legend of Table 2 Sedentary behavior pattern measures.
- Table 2 Sedentary behavior pattern measures.

Table 1 Legend of Table 2 Sedentary behavior pattern measures.

| General                                                             |                                                                                                                                                                                                                                                   |
|---------------------------------------------------------------------|---------------------------------------------------------------------------------------------------------------------------------------------------------------------------------------------------------------------------------------------------|
| CI                                                                  | Confidence Interval                                                                                                                                                                                                                               |
| SH                                                                  | Sedentary Hour                                                                                                                                                                                                                                    |
| DO                                                                  | Direct Observation                                                                                                                                                                                                                                |
| IQR                                                                 | interquartile range from the 1st and 3rd quartile                                                                                                                                                                                                 |
| S                                                                   | Sitting                                                                                                                                                                                                                                           |
| S+R                                                                 | Sitting or Reclining                                                                                                                                                                                                                              |
| S+L                                                                 | Sitting or Lying                                                                                                                                                                                                                                  |
| S+S+L                                                               | Sitting or Standing or Lying                                                                                                                                                                                                                      |
| S→S                                                                 | sit-to-stand transition                                                                                                                                                                                                                           |
| Data cleaning                                                       |                                                                                                                                                                                                                                                   |
| *                                                                   | Number of times across the entire wear time (≥5 days).                                                                                                                                                                                            |
| Excessive values were removed, if ...                               |                                                                                                                                                                                                                                                   |
| Excessive values / artefacts                                        | Either: 1) excessively high counts were removed, or 2) days with excessively high counts (>20 000 cpm) were excluded, or 3) days containing spuriously high values were removed                                                                   |
| Non-wear was removed, if ...                                        |                                                                                                                                                                                                                                                   |
| ≥10 min zeros                                                       | at least 10 min of continuous zeros                                                                                                                                                                                                               |
| ≥20 min zeros                                                       | at least 20 min of continuous zeros                                                                                                                                                                                                               |
| ≥20 min zeros, with gap (2min)                                      | at least 20 min of continuous zeros, with allowance for 1 to 2 min of counts >0 cpm                                                                                                                                                               |
| ≥60 min zeros                                                       | at least 60 min of continuous zeros                                                                                                                                                                                                               |
| ≥60 min zeros, with gap (2min)                                      | at least 60 min of continuous zeros, with allowance for 1 to 2 min of counts >0 cpm                                                                                                                                                               |
| ≥60 min zeros, with gap (2min <150 cpm)                             | at least 60 min of continuous zeros, with allowance for 1 to 2 min of counts 0-150 cpm                                                                                                                                                            |
| ≥60 min zeros, with gap (2min <100 cpm)                             | at least 60 min of continuous zeros, with allowance for 1 to 2 min of counts 0-100 cpm                                                                                                                                                            |
| ≥60 min zeros, with gap (2min <50 cpm)                              | at least 60 min of continuous zeros, with allowance for 1 to 2 min of counts 0-50 cpm                                                                                                                                                             |
| ≥60 min <1.0 METs, with gap (2min ≥1.0 METs)                        | at least 60 consecutive minutes of no activity (i.e., estimated activity intensity < 1.0 METs), with allowance for 2 minutes of activities where intensity rose up to 1.0 METs                                                                    |
| ≥90 min zeros                                                       | at least 90 min of continuous zeros                                                                                                                                                                                                               |
| ≥90 min zeros, with gap (2min if ≥30 min before and after)          | at least ≥90 consecutive minutes of zero counts to allow for movement of the unworn device, two minutes with movement (counts > 0) were permitted as long as ≥30 minutes of non-movement were observed before and after it.                       |
| ≥90 min zeros vertical, with gap (2min if ≥30 min before and after) | at least ≥90 consecutive minutes of zero counts on the vertical axis; to allow for movement of the unworn device, two minutes with movement (counts > 0) were permitted as long as ≥30 minutes of non-movement were observed before and after it. |
| >100 min zeros                                                      | at least 101 min of continuous zeros (more than 100 minutes)                                                                                                                                                                                      |
| ≥120 min zeros                                                      | at least 120 min of continuous zeros                                                                                                                                                                                                              |
| >120 min zeros                                                      | at least 121 min of continuous zeros                                                                                                                                                                                                              |
| ≥150 min zeros                                                      | at least 150 min of continuous zeros                                                                                                                                                                                                              |
| ≥180 min zeros                                                      | at least 180 min of continuous zeros                                                                                                                                                                                                              |
| Diary                                                               | non-wear was logged in a diary or logbook e.g. self-reported sleeping or removal of the sensor (e.g. during water activities).                                                                                                                    |

**Pattern measures of sedentary behavior in adults: A literature review.**

*Table 2 Sedentary behavior pattern measures.*

| Study                                       | Population                                                                                | Sensor & settings                                                               | Data cleaning                                                                     | SB classification                | SB pattern measure                                                     | Unit                        | Per subject / day (mean ± SD) |
|---------------------------------------------|-------------------------------------------------------------------------------------------|---------------------------------------------------------------------------------|-----------------------------------------------------------------------------------|----------------------------------|------------------------------------------------------------------------|-----------------------------|-------------------------------|
|                                             | <i>N (Mean ± SD)</i><br><i>Men/Women</i><br><i>Age(Mean ± SD)</i><br><i>Health status</i> | <i>Sensor brand/type</i><br><i>Settings (e.g. epoch length; type of filter)</i> | <i>Non-wear</i><br><i>Day/night</i><br><i>Ouliers</i><br><i>Minimum wear time</i> | < 100 cpm<br>MLT<br>L+S<br>L+S+S | Wear-time<br>Total SB<br>Bouts<br>Breaks<br>Law exponent<br>Gini index |                             |                               |
| <b>(Barber, Forster, &amp; Birch, 2015)</b> | N = 28<br>Age: 82.1 ± 9.2<br><br>Care home residents                                      | ActiGraph GTX-3<br>Epoch: 15s<br>Elastic belt to be worn over the right hip.    | ≥5d<br>≥10h<br>Waking hours<br>Non-wear (≥120 min zeros)                          | < 100 cpm                        | Wear-time                                                              | All subjects (hours)        | 12.78 ± 1.90                  |
|                                             |                                                                                           |                                                                                 |                                                                                   |                                  | Total SB                                                               | (hours) (mean ± SD)         |                               |
|                                             |                                                                                           |                                                                                 |                                                                                   |                                  |                                                                        | All subjects                | 10.12 ± 2.18                  |
|                                             |                                                                                           |                                                                                 |                                                                                   |                                  |                                                                        | < 85 yrs                    | 10.22 ± 2.48                  |
|                                             |                                                                                           |                                                                                 |                                                                                   |                                  |                                                                        | ≥ 85 yrs                    | 10.02 ± 1.92                  |
|                                             |                                                                                           |                                                                                 |                                                                                   |                                  |                                                                        | Men                         | 9.68 ± 2.13                   |
|                                             |                                                                                           |                                                                                 |                                                                                   |                                  |                                                                        | Women                       | 10.32 ± 2.23                  |
|                                             |                                                                                           |                                                                                 |                                                                                   |                                  |                                                                        | FAC 0-2                     | 11.27 ± 1.33                  |
|                                             |                                                                                           |                                                                                 |                                                                                   |                                  |                                                                        | FAC 3-5                     | 9.73 ± 2.30                   |
|                                             |                                                                                           |                                                                                 |                                                                                   |                                  |                                                                        | BI ≤ 11                     | 10.97 ± 1.53                  |
|                                             |                                                                                           |                                                                                 |                                                                                   |                                  |                                                                        | BI >11                      | 8.78 ± 2.43                   |
|                                             |                                                                                           |                                                                                 |                                                                                   |                                  |                                                                        | Outside in last month YES   | 11.35 ± 1.60                  |
|                                             |                                                                                           |                                                                                 |                                                                                   |                                  |                                                                        | Outside in last month NO    | 9.83 ± 2.23                   |
|                                             |                                                                                           |                                                                                 |                                                                                   |                                  |                                                                        | Fallen in last 6 months YES | 8.95 ± 2.30                   |
|                                             |                                                                                           |                                                                                 |                                                                                   |                                  |                                                                        | Fallen in last 6 months NO  | 11.12 ± 1.55                  |
|                                             |                                                                                           |                                                                                 |                                                                                   |                                  |                                                                        | MMSE ≤ 24                   | 11.13 ± 1.48                  |
|                                             |                                                                                           |                                                                                 |                                                                                   |                                  |                                                                        | MMSE > 24                   | 8.52 ± 2.12                   |
|                                             | % of waking time                                                                          |                                                                                 |                                                                                   |                                  |                                                                        |                             |                               |
|                                             | All subjects                                                                              | 79                                                                              |                                                                                   |                                  |                                                                        |                             |                               |
|                                             | < 85 yrs                                                                                  | 75.3 ± 12.2                                                                     |                                                                                   |                                  |                                                                        |                             |                               |
|                                             | ≥ 85 yrs                                                                                  | 83.3 ± 13.3                                                                     |                                                                                   |                                  |                                                                        |                             |                               |
|                                             | Men                                                                                       | 76.7 ± 16                                                                       |                                                                                   |                                  |                                                                        |                             |                               |
|                                             | Women                                                                                     | 80.6 ± 11.9                                                                     |                                                                                   |                                  |                                                                        |                             |                               |
|                                             | FAC 0-2                                                                                   | 88.2 ± 6.6                                                                      |                                                                                   |                                  |                                                                        |                             |                               |
|                                             | FAC 3-5                                                                                   | 76.4 ± 13.6                                                                     |                                                                                   |                                  |                                                                        |                             |                               |
|                                             | BI ≤ 11                                                                                   | 84.1 ± 7.8                                                                      |                                                                                   |                                  |                                                                        |                             |                               |
|                                             | BI >11                                                                                    | 71.9 ± 16.5                                                                     |                                                                                   |                                  |                                                                        |                             |                               |
|                                             | Outside in last month YES                                                                 | 90.2 ± 5.4                                                                      |                                                                                   |                                  |                                                                        |                             |                               |

Pattern measures of sedentary behavior in adults: A literature review.

| Study | Population | Sensor & settings | Data cleaning | SB classification | SB pattern measure | Unit                            | Per subject / day (mean ± SD) |
|-------|------------|-------------------|---------------|-------------------|--------------------|---------------------------------|-------------------------------|
|       |            |                   |               |                   |                    | Outside in last month NO        | 77.0 ± 13.2                   |
|       |            |                   |               |                   |                    | Fallen in last 6 months YES     | 73.5 ± 16.5                   |
|       |            |                   |               |                   |                    | Fallen in last 6 months NO      | 84.4 ± 6.6                    |
|       |            |                   |               |                   |                    | MMSE ≤ 24                       | 85.4 ± 6.9                    |
|       |            |                   |               |                   |                    | MMSE > 24                       | 69.1 ± 14.3                   |
|       |            |                   |               |                   | Bouts              | Number(n): BL: ≥ 60 min         |                               |
|       |            |                   |               |                   |                    | All subjects                    | 3.3 ± 1.3                     |
|       |            |                   |               |                   |                    | < 85 yrs                        | 3.5 ± 1.6                     |
|       |            |                   |               |                   |                    | ≥ 85 yrs                        | 3.1 ± 1                       |
|       |            |                   |               |                   |                    | Men                             | 2.8 ± 1.5                     |
|       |            |                   |               |                   |                    | Women                           | 3.5 ± 1.2                     |
|       |            |                   |               |                   |                    | FAC 0-2                         | 2.8 ± 3.4                     |
|       |            |                   |               |                   |                    | FAC 3-5                         | 1.3 ± 1.3                     |
|       |            |                   |               |                   |                    | BI ≤ 11                         | 3.6 ± 1.3                     |
|       |            |                   |               |                   |                    | BI >11                          | 2.7 ± 1.3                     |
|       |            |                   |               |                   |                    | Outside in last month YES       | 2.5 ± 1.1                     |
|       |            |                   |               |                   |                    | Outside in last month NO        | 3.4 ± 1.4                     |
|       |            |                   |               |                   |                    | Fallen in last 6 months YES     | 3 ± 1.4                       |
|       |            |                   |               |                   |                    | Fallen in last 6 months NO      | 3.5 ± 1.2                     |
|       |            |                   |               |                   |                    | MMSE ≤ 24                       | 3.6 ± 1.2                     |
|       |            |                   |               |                   |                    | MMSE > 24                       | 2.3 ± 1.3                     |
|       |            |                   |               |                   |                    | BL (min) (of bouts BL ≥ 60 min) |                               |
|       |            |                   |               |                   |                    | All subjects                    | 167 ± 211                     |
|       |            |                   |               |                   |                    | < 85 yrs                        | 107 ± 45                      |
|       |            |                   |               |                   |                    | ≥ 85 yrs                        | 228 ± 287                     |
|       |            |                   |               |                   |                    | Men                             | 248 ± 364                     |
|       |            |                   |               |                   |                    | Women                           | 129 ± 52                      |
|       |            |                   |               |                   |                    | FAC 0-2                         | 345 ± 382                     |
|       |            |                   |               |                   |                    | FAC 3-5                         | 108 ± 36                      |
|       |            |                   |               |                   |                    | BI ≤ 11                         | 195 ± 265                     |
|       |            |                   |               |                   |                    | BI >11                          | 124 ± 63                      |
|       |            |                   |               |                   |                    | Outside in last month YES       | 396 ± 452                     |
|       |            |                   |               |                   |                    | Outside in last month NO        | 118 ± 52                      |
|       |            |                   |               |                   |                    | Fallen in last 6 months YES     | 102 ± 35                      |
|       |            |                   |               |                   |                    | Fallen in last 6 months NO      | 224 ± 278                     |
|       |            |                   |               |                   |                    | MMSE ≤ 24                       | 213 ± 262                     |

**Pattern measures of sedentary behavior in adults: A literature review.**

| Study                                                     | Population                          | Sensor & settings              | Data cleaning                                               | SB classification | SB pattern measure | Unit                       | Per subject / day (mean ± SD) |
|-----------------------------------------------------------|-------------------------------------|--------------------------------|-------------------------------------------------------------|-------------------|--------------------|----------------------------|-------------------------------|
|                                                           |                                     |                                |                                                             |                   |                    | MMSE > 24                  | 96.2 ± 38.6                   |
| (Barreira, Zderic, Schuna, Hamilton, & Tudor-Locke, 2015) | N = 15<br>Age = 27.5 ± 2.5yrs       | ActiGraph GT3X+                | 07:00 – 22:00h                                              | <100cpm           | → Breaks           | Number (n/day)             | 74 ± 4.1                      |
|                                                           |                                     | Epoch: 1 min                   |                                                             | ≥100cpm           |                    |                            |                               |
|                                                           |                                     | ActivPAL                       | 07:00 – 22:00h                                              | Sit → Stand       | Breaks             | Number (n/day)             | 39 ± 3.1                      |
|                                                           |                                     | Epoch: 1 min                   |                                                             |                   |                    |                            |                               |
| (Baruth, Sharpe, Hutto, Wilcox, & Warren, 2013)           | N = 197<br>Age: 39.3 ± 7.6<br>Women | Actigraph GT1M<br>Epoch: 1 min | ≥ 4d<br>≥ 10h/d<br>Waking hours<br>Non-wear (≥60 min zeros) | < 100 cpm         | Total SB           | Hours (h)                  | 9.07 ± 1.79                   |
|                                                           |                                     |                                |                                                             |                   |                    | Hours (h) in the morning   | 2.51 ± 0.74                   |
|                                                           |                                     |                                |                                                             |                   |                    | Hours (h) in the afternoon | 3.75 ± 0.59                   |
|                                                           |                                     |                                |                                                             |                   |                    | Hours (h) in the evening   | 2.55 ± 0.95                   |
|                                                           |                                     |                                |                                                             |                   |                    | % of wear time (%)         | 64.1 ± 8.7                    |
|                                                           |                                     |                                |                                                             |                   |                    | % of morning               | 61.8 ± 10.7                   |
|                                                           |                                     |                                |                                                             |                   |                    | % of afternoon             | 63.9 ± 9.5                    |
|                                                           |                                     |                                |                                                             |                   |                    | % of evening               | 65.8 ± 10.0                   |
|                                                           |                                     |                                |                                                             |                   |                    | Bouts                      | Number per SB hour (n/SH)     |
|                                                           |                                     |                                |                                                             |                   |                    | BL: ≥1 min                 | 10.5 ± 2.8                    |
|                                                           |                                     |                                |                                                             |                   |                    | BL: ≥10 min                | 1.6 ± 0.2                     |
|                                                           |                                     |                                |                                                             |                   |                    | BL: ≥30 min                | 0.3 ± 0.1                     |
|                                                           |                                     |                                |                                                             |                   |                    | BL: ≥60 min                | 0.1 ± 0.04                    |
|                                                           |                                     |                                |                                                             |                   |                    | BL (min)                   |                               |
|                                                           |                                     |                                |                                                             |                   |                    | BL: ≥1 min                 | 6.4 ± 1.7                     |
| BL: ≥10 min                                               | 21.4 ± 3.5                          |                                |                                                             |                   |                    |                            |                               |
| BL: ≥30 min                                               | 46.3 ± 7.1                          |                                |                                                             |                   |                    |                            |                               |
| BL: ≥60 min                                               | 79.9 ± 17.9                         |                                |                                                             |                   |                    |                            |                               |
|                                                           | Number (n) in the morning           | 11.5 ± 3.8                     |                                                             |                   |                    |                            |                               |
|                                                           | Number (n) in the afternoon         | 10.9 ± 3.1                     |                                                             |                   |                    |                            |                               |
|                                                           | Number (n) in the evening           | 10.2 ± 3.4                     |                                                             |                   |                    |                            |                               |
| Breaks                                                    | Number (n)                          | 90.9 ± 16.0                    |                                                             |                   |                    |                            |                               |
|                                                           | Intensity (cpm)                     | 484.3 ± 75.2                   |                                                             |                   |                    |                            |                               |
|                                                           | Duration (min)                      | 3.3 ± 0.8                      |                                                             |                   |                    |                            |                               |
| (Bellettiere e.a., 2015)                                  | N = 307<br>Age = 83.6 ± 6.4         | ActiGraph GT3X+                | ≥10h/day<br>4 days                                          | <100cpm           | Wear-time          | (hours)                    | 13.5 ± 1.3                    |
|                                                           |                                     |                                |                                                             |                   | Total SB           | (hours)                    |                               |

**Pattern measures of sedentary behavior in adults: A literature review.**

| Study | Population | Sensor & settings                                                   | Data cleaning                                                                  | SB classification | SB pattern measure | Unit                                 | Per subject / day (mean ± SD) |
|-------|------------|---------------------------------------------------------------------|--------------------------------------------------------------------------------|-------------------|--------------------|--------------------------------------|-------------------------------|
|       |            | 30Hz, low freq. extension.<br>Epoch: 1 minute<br>Only vertical axis | Non-wear (≥90 min zeros vertical; with gap (2min if ≥30 min before and after)) |                   |                    | All subjects                         | 9.73 ± 1.27                   |
|       |            |                                                                     |                                                                                |                   | Bouts              | Number (n)<br>All subjects; BL ≥1min | 70.6 ± 13.7                   |
|       |            |                                                                     |                                                                                |                   |                    | % of total SB (%)                    |                               |
|       |            |                                                                     |                                                                                |                   |                    | All subjects                         |                               |
|       |            |                                                                     |                                                                                |                   |                    | BL: >1 min                           | 100.0                         |
|       |            |                                                                     |                                                                                |                   |                    | BL: ≥5 min                           | 86.0                          |
|       |            |                                                                     |                                                                                |                   |                    | BL: ≥10 min                          | 74.1                          |
|       |            |                                                                     |                                                                                |                   |                    | BL: ≥20 min                          | 57.5                          |
|       |            |                                                                     |                                                                                |                   |                    | BL: ≥30 min                          | 45.5                          |
|       |            |                                                                     |                                                                                |                   |                    | BL: ≥40 min                          | 35.9                          |
|       |            |                                                                     |                                                                                |                   |                    | BL: ≥50 min                          | 28.3                          |
|       |            |                                                                     |                                                                                |                   |                    | BL: ≥60 min                          | 21.2                          |
|       |            |                                                                     |                                                                                |                   |                    | BL: ≥90 min                          | 7.5                           |
|       |            |                                                                     |                                                                                |                   |                    | BL: ≥120 min                         | 3.1                           |
|       |            |                                                                     |                                                                                |                   |                    | Men                                  |                               |
|       |            |                                                                     |                                                                                |                   |                    | BL: >1 min                           | 100.0                         |
|       |            |                                                                     |                                                                                |                   |                    | BL: ≥5 min                           | 88.6                          |
|       |            |                                                                     |                                                                                |                   |                    | BL: ≥10 min                          | 78.1                          |
|       |            |                                                                     |                                                                                |                   |                    | BL: ≥20 min                          | 62.5                          |
|       |            |                                                                     |                                                                                |                   |                    | BL: ≥30 min                          | 50.1                          |
|       |            |                                                                     |                                                                                |                   |                    | BL: ≥40 min                          | 39.9                          |
|       |            |                                                                     |                                                                                |                   |                    | BL: ≥50 min                          | 31.7                          |
|       |            |                                                                     |                                                                                |                   |                    | BL: ≥60 min                          | 23.8                          |
|       |            |                                                                     |                                                                                |                   |                    | BL: ≥90 min                          | 8.1                           |
|       |            |                                                                     |                                                                                |                   |                    | BL: ≥120 min                         | 3.3                           |
|       |            |                                                                     |                                                                                |                   |                    | Women                                |                               |
|       |            |                                                                     |                                                                                |                   |                    | BL: >1 min                           | 100.0                         |
|       |            |                                                                     |                                                                                |                   |                    | BL: ≥5 min                           | 84.9                          |
|       |            |                                                                     |                                                                                |                   |                    | BL: ≥10 min                          | 72.5                          |
|       |            |                                                                     |                                                                                |                   |                    | BL: ≥20 min                          | 55.4                          |
|       |            |                                                                     |                                                                                |                   |                    | BL: ≥30 min                          | 43.6                          |
|       |            |                                                                     |                                                                                |                   |                    | BL: ≥40 min                          | 34.2                          |
|       |            |                                                                     |                                                                                |                   |                    | BL: ≥50 min                          | 26.9                          |
|       |            |                                                                     |                                                                                |                   |                    | BL: ≥60 min                          | 20.0                          |
|       |            |                                                                     |                                                                                |                   |                    | BL: ≥90 min                          | 7.3                           |

Pattern measures of sedentary behavior in adults: A literature review.

| Study | Population | Sensor & settings | Data cleaning | SB classification | SB pattern measure | Unit                   | Per subject / day (mean ± SD) |
|-------|------------|-------------------|---------------|-------------------|--------------------|------------------------|-------------------------------|
|       |            |                   |               |                   |                    | BL: ≥120 min           | 3.0                           |
|       |            |                   |               |                   |                    | 65-79yrs               |                               |
|       |            |                   |               |                   |                    | BL: >1 min             | 100.0                         |
|       |            |                   |               |                   |                    | BL: ≥5 min             | 85.5                          |
|       |            |                   |               |                   |                    | BL: ≥10 min            | 73.1                          |
|       |            |                   |               |                   |                    | BL: ≥20 min            | 55.6                          |
|       |            |                   |               |                   |                    | BL: ≥30 min            | 43.6                          |
|       |            |                   |               |                   |                    | BL: ≥40 min            | 33.7                          |
|       |            |                   |               |                   |                    | BL: ≥50 min            | 26.8                          |
|       |            |                   |               |                   |                    | BL: ≥60 min            | 19.8                          |
|       |            |                   |               |                   |                    | BL: ≥90 min            | 6.9                           |
|       |            |                   |               |                   |                    | BL: ≥120 min           | 2.6                           |
|       |            |                   |               |                   |                    | 80-89yrs               |                               |
|       |            |                   |               |                   |                    | BL: >1 min             | 100.0                         |
|       |            |                   |               |                   |                    | BL: ≥5 min             | 86.0                          |
|       |            |                   |               |                   |                    | BL: ≥10 min            | 74.0                          |
|       |            |                   |               |                   |                    | BL: ≥20 min            | 57.3                          |
|       |            |                   |               |                   |                    | BL: ≥30 min            | 45.1                          |
|       |            |                   |               |                   |                    | BL: ≥40 min            | 35.4                          |
|       |            |                   |               |                   |                    | BL: ≥50 min            | 27.7                          |
|       |            |                   |               |                   |                    | BL: ≥60 min            | 20.5                          |
|       |            |                   |               |                   |                    | BL: ≥90 min            | 7.5                           |
|       |            |                   |               |                   |                    | BL: ≥120 min           | 3.0                           |
|       |            |                   |               |                   |                    | 90+yrs                 |                               |
|       |            |                   |               |                   |                    | BL: >1 min             | 100.0                         |
|       |            |                   |               |                   |                    | BL: ≥5 min             | 86.5                          |
|       |            |                   |               |                   |                    | BL: ≥10 min            | 75.4                          |
|       |            |                   |               |                   |                    | BL: ≥20 min            | 60.3                          |
|       |            |                   |               |                   |                    | BL: ≥30 min            | 48.8                          |
|       |            |                   |               |                   |                    | BL: ≥40 min            | 39.4                          |
|       |            |                   |               |                   |                    | BL: ≥50 min            | 31.7                          |
|       |            |                   |               |                   |                    | BL: ≥60 min            | 24.4                          |
|       |            |                   |               |                   |                    | BL: ≥90 min            | 8.6                           |
|       |            |                   |               |                   |                    | BL: ≥120 min           | 4.0                           |
|       |            |                   |               |                   |                    | BL (min) (median (se)) |                               |
|       |            |                   |               |                   |                    | All subjects           | 2.9 (0.1)                     |



Pattern measures of sedentary behavior in adults: A literature review.

| Study                                                 | Population                                                                                                                                                  | Sensor & settings                                                                                                                                                         | Data cleaning                                                                                                                | SB classification         | SB pattern measure             | Unit                                                                            | Per subject / day (mean ± SD) |           |
|-------------------------------------------------------|-------------------------------------------------------------------------------------------------------------------------------------------------------------|---------------------------------------------------------------------------------------------------------------------------------------------------------------------------|------------------------------------------------------------------------------------------------------------------------------|---------------------------|--------------------------------|---------------------------------------------------------------------------------|-------------------------------|-----------|
|                                                       |                                                                                                                                                             |                                                                                                                                                                           |                                                                                                                              |                           |                                | Fragmentation of sedentary bouts (F <sub>sed</sub> ) = bouts per SB hour (n/SH) |                               |           |
|                                                       |                                                                                                                                                             |                                                                                                                                                                           |                                                                                                                              |                           |                                | MS patients                                                                     | 0.26 ± 0.07                   |           |
|                                                       |                                                                                                                                                             |                                                                                                                                                                           |                                                                                                                              |                           |                                | Control group                                                                   | 0.30 ± 0.06                   |           |
|                                                       |                                                                                                                                                             |                                                                                                                                                                           |                                                                                                                              |                           |                                | Gini index (G)                                                                  |                               |           |
|                                                       |                                                                                                                                                             |                                                                                                                                                                           |                                                                                                                              |                           |                                | MS patients                                                                     | 0.50 ± 0.05                   |           |
|                                                       |                                                                                                                                                             |                                                                                                                                                                           |                                                                                                                              |                           |                                | Control group                                                                   | 0.47 ± 0.05                   |           |
| (Boerema, Essink, Tönis, van Velsen, & Hermens, 2015) | N = 27<br>Age = 37.9 ± 13.5<br>Office workers                                                                                                               | Promove 3D<br>40Hz<br>Epoch: 1 min.<br>IMA                                                                                                                                | Waking hours<br>5d                                                                                                           | ≤ 1.660 m·s <sup>-2</sup> | Wear-time                      | Hours (h)                                                                       | 13.3 ± 2.55                   |           |
|                                                       |                                                                                                                                                             |                                                                                                                                                                           |                                                                                                                              |                           | Total SB                       | % of wear-time                                                                  | 85.66                         |           |
|                                                       |                                                                                                                                                             |                                                                                                                                                                           |                                                                                                                              |                           | SB Bouts                       | BL (mean)                                                                       | 17.34                         |           |
|                                                       |                                                                                                                                                             |                                                                                                                                                                           |                                                                                                                              |                           |                                | BL (median)                                                                     | 5.09                          |           |
|                                                       |                                                                                                                                                             |                                                                                                                                                                           |                                                                                                                              |                           |                                | % of total SB (%)                                                               |                               |           |
|                                                       |                                                                                                                                                             |                                                                                                                                                                           |                                                                                                                              |                           |                                | BL: 54.78 min (W <sub>50%</sub> )                                               | 50.0                          |           |
|                                                       | Gini index                                                                                                                                                  | 0.67                                                                                                                                                                      |                                                                                                                              |                           |                                |                                                                                 |                               |           |
| (Carson e.a., 2014)                                   | N = 4935<br>Age: 45.9 ± 15.1                                                                                                                                | Actical<br>Worn on right hip on an elasticized belt.<br>Epoch: 1min                                                                                                       | ≥ 4d (incl. Sat. or Sun.)<br>≥ 10h/d<br>Waking hours<br>Non-wear (≥60 min zeros, with gap (2min <100 cpm))                   | <100 cpm                  | Wear-time                      | Hours (h)                                                                       | 14.73 ± 1.49                  |           |
|                                                       |                                                                                                                                                             |                                                                                                                                                                           |                                                                                                                              |                           | Total SB                       | Hours (h)                                                                       | 10.76 ± 2.03                  |           |
|                                                       |                                                                                                                                                             |                                                                                                                                                                           |                                                                                                                              |                           | Bouts                          | Duration (min); BL: ≥20 min                                                     | 331.6 ± 126.5                 |           |
|                                                       |                                                                                                                                                             |                                                                                                                                                                           |                                                                                                                              |                           | Breaks                         | Number (n)                                                                      | 83.2 ± 18.3                   |           |
| (Cavanaugh, Kochi, & Stergiou, 2010)                  | N = 157<br>Age: 80.1 ± 5.8<br>community-dwelling older adults:<br>1) high (≥10,000 steps/d)<br>2) moderate (5,000-10,000 steps/day)<br>3) inactive (<5,000) | StepWatch<br>Attached to the ankle using Velcro closures.<br>During data processing, stride counts are doubled to reflect steps accumulated by both legs.<br>Epoch: 1 min | 14d<br>24h/d (Except when bathing, showering or swimming and to refrain from aerobic exercise other than walking or jogging) | 0 steps                   | Total SB                       | % of wear time (%)                                                              |                               |           |
|                                                       |                                                                                                                                                             |                                                                                                                                                                           |                                                                                                                              |                           |                                | Highly active elderly                                                           | 72.2±2.1                      |           |
|                                                       |                                                                                                                                                             |                                                                                                                                                                           |                                                                                                                              |                           |                                | Moderately active elderly                                                       | 79.2±1.6                      |           |
|                                                       |                                                                                                                                                             |                                                                                                                                                                           |                                                                                                                              |                           |                                | Inactive elderly                                                                | 86.9±1.0                      |           |
|                                                       |                                                                                                                                                             |                                                                                                                                                                           |                                                                                                                              |                           | Sequence activity-rest periods | of Detrended Fluctuation Analysis (DFA) scaling component (α)                   |                               |           |
|                                                       |                                                                                                                                                             |                                                                                                                                                                           |                                                                                                                              |                           |                                |                                                                                 | Highly active elderly         | 0.88±0.11 |
|                                                       |                                                                                                                                                             |                                                                                                                                                                           |                                                                                                                              |                           |                                |                                                                                 | Moderately active elderly     | 0.82±0.08 |
|                                                       |                                                                                                                                                             |                                                                                                                                                                           |                                                                                                                              |                           |                                | Inactive elderly                                                                | 0.72±0.07                     |           |
|                                                       |                                                                                                                                                             |                                                                                                                                                                           |                                                                                                                              |                           |                                | Entropy Rate (ER)                                                               |                               |           |
|                                                       |                                                                                                                                                             |                                                                                                                                                                           |                                                                                                                              |                           |                                | Highly active elderly                                                           | 3.94±0.39                     |           |
|                                                       | Moderately active elderly                                                                                                                                   | 3.61±0.55                                                                                                                                                                 |                                                                                                                              |                           |                                |                                                                                 |                               |           |
|                                                       | Inactive elderly                                                                                                                                            | 2.89±0.57                                                                                                                                                                 |                                                                                                                              |                           |                                |                                                                                 |                               |           |
|                                                       | N=75                                                                                                                                                        | ActiGraph GT3X                                                                                                                                                            | 24h/day → Waking hours                                                                                                       | ≤100cpm                   | Wear-time                      | Hours (h) (median)                                                              | 14.15                         |           |



**Pattern measures of sedentary behavior in adults: A literature review.**

| Study                                    | Population                                                                                                                                                            | Sensor & settings                          | Data cleaning                                                              | SB classification | SB pattern measure | Unit                                                                                                    | Per subject / day (mean ± SD)    |
|------------------------------------------|-----------------------------------------------------------------------------------------------------------------------------------------------------------------------|--------------------------------------------|----------------------------------------------------------------------------|-------------------|--------------------|---------------------------------------------------------------------------------------------------------|----------------------------------|
| (Chapman, Fraser, Brown, & Burton, 2015) | Age= 42yrs<br>Adults with mental illness                                                                                                                              | Right hip<br>Vertical axis<br>Epoch: 1 min | 7 days → ≥ 4d with 90% of waking hours<br>Non-wear (≥60 min zeros + diary) |                   | Total SB           | % of wear-time (median) (IQR)                                                                           | 65 (58 – 72)                     |
|                                          |                                                                                                                                                                       |                                            |                                                                            |                   | Bouts              | % of Total SB (IQR)<br>BL ≥20 min                                                                       | 34 (25 – 42)                     |
|                                          |                                                                                                                                                                       |                                            |                                                                            |                   | Breaks             | Number (n) (median) (IQR)<br>Break Length (min) (median) (IQR)                                          | 87 (77 – 102)<br>3.3 (2.7 – 3.9) |
| (S. F. . Chastin e.a., 2010)             | N = 34<br>Age: 55.4 ± 9.5<br><br>Groups:<br>1) Parkinson (PD)<br>2) Control                                                                                           | ActivPAL<br>Sf = 10 Hz;                    | 7d<br>24h/d                                                                | S+L               | Total SB           | % of wear time (24h) (%)<br>PD<br>Control                                                               | 76.7 ± 10.6<br>71.5 ± 9.4        |
|                                          |                                                                                                                                                                       |                                            |                                                                            |                   | Bouts              | % of Total SB (%)<br>PD: BL: < 3.5h<br>Control: BL < 2h                                                 | 60<br>60                         |
|                                          |                                                                                                                                                                       |                                            |                                                                            |                   |                    | Distribution of bout lengths (α)<br>PD<br>Control                                                       | 1.32 ± 0.05<br>1.49 ± 0.07       |
|                                          |                                                                                                                                                                       |                                            |                                                                            |                   |                    | Gini index (G)<br>PD<br>Control                                                                         | 0.84 ± 0.06<br>0.75 ± 0.05       |
|                                          |                                                                                                                                                                       |                                            |                                                                            |                   |                    |                                                                                                         |                                  |
|                                          |                                                                                                                                                                       |                                            |                                                                            |                   |                    |                                                                                                         |                                  |
|                                          |                                                                                                                                                                       |                                            |                                                                            |                   |                    |                                                                                                         |                                  |
| (S.F.M. Chastin & Granat, 2010)          | N = 126<br>Age: 49.7<br><br>Groups:<br>1) Healthy active (Ha);<br>2) Healthy sedentary (Hs);<br>3) Chronic low back pain (BLP);<br>4) Chronic fatigue syndrome (CFS). | ActivPAL                                   | 24h/d                                                                      | S+L               | Total SB           | % of wear time (24h) (min, max)                                                                         | 75% (41%, 92%)                   |
|                                          |                                                                                                                                                                       |                                            |                                                                            |                   | Bouts              | Duration (min) (median)<br>Ha<br>Hs<br>LBP<br>CFS                                                       | 17.3<br>20.7<br>23.8<br>24.9     |
|                                          |                                                                                                                                                                       |                                            |                                                                            |                   |                    | % of Total SB (%)<br>Ha: BL: >17.3 min<br>Hs: BL: >20.7 min<br>LBP: BL: >23.8 min<br>CFS: BL: >24.9 min | 71.5<br>76.1<br>92.7<br>95.4     |
|                                          |                                                                                                                                                                       |                                            |                                                                            |                   |                    | Distribution of bout lengths (α)<br>Ha<br>Hs<br>LBP<br>CFS                                              | 2.27<br>1.95<br>1.80<br>1.76     |
|                                          |                                                                                                                                                                       |                                            |                                                                            |                   |                    |                                                                                                         |                                  |
|                                          |                                                                                                                                                                       |                                            |                                                                            |                   |                    |                                                                                                         |                                  |
|                                          |                                                                                                                                                                       |                                            |                                                                            |                   |                    |                                                                                                         |                                  |
|                                          |                                                                                                                                                                       |                                            |                                                                            |                   |                    |                                                                                                         |                                  |
|                                          |                                                                                                                                                                       |                                            |                                                                            |                   |                    |                                                                                                         |                                  |
|                                          |                                                                                                                                                                       |                                            |                                                                            |                   |                    |                                                                                                         |                                  |

Pattern measures of sedentary behavior in adults: A literature review.

| Study                                                           | Population                   | Sensor & settings              | Data cleaning                                                                                                                      | SB classification | SB pattern measure | Unit           | Per subject / day (mean ± SD) |  |
|-----------------------------------------------------------------|------------------------------|--------------------------------|------------------------------------------------------------------------------------------------------------------------------------|-------------------|--------------------|----------------|-------------------------------|--|
|                                                                 |                              |                                |                                                                                                                                    |                   |                    | Gini index (G) |                               |  |
|                                                                 |                              |                                |                                                                                                                                    |                   |                    | Ha             | 0.35                          |  |
|                                                                 |                              |                                |                                                                                                                                    |                   |                    | Hs             | 0.40                          |  |
|                                                                 |                              |                                |                                                                                                                                    |                   |                    | LBP            | 0.74                          |  |
|                                                                 |                              |                                |                                                                                                                                    |                   |                    | CFS            | 0.77                          |  |
| (S. F. M. . Chastin, Mandrichenko, Helbostadt, & Skelton, 2014) | N = 2635<br>Age: 47 (median) | Actigraph 7164<br>Epoch: 1 min | ≥ 5d (incl. Sat. or Sun.)<br>≥ 10h/d<br>Waking hours<br>Non-wear (≥60 min zeros, were with gap (2min <50 cpm))<br>Excessive values | < 100 cpm         | Total SB           | % of wear time |                               |  |
|                                                                 |                              |                                |                                                                                                                                    |                   |                    | Men 22-29      | 52.4 ± 13.8                   |  |
|                                                                 |                              |                                |                                                                                                                                    |                   |                    | Men 30-39      | 54.0 ± 13.4                   |  |
|                                                                 |                              |                                |                                                                                                                                    |                   |                    | Men 40-49      | 53.3 ± 12.3                   |  |
|                                                                 |                              |                                |                                                                                                                                    |                   |                    | Men 50-59      | 58.2 ± 11.9                   |  |
|                                                                 |                              |                                |                                                                                                                                    |                   |                    | Men 60-69      | 60.6 ± 11.1                   |  |
|                                                                 |                              |                                |                                                                                                                                    |                   |                    | Men 70-79      | 68.3 ± 10.5                   |  |
|                                                                 |                              |                                |                                                                                                                                    |                   |                    | Men 80+        | 72.5 ± 11.0                   |  |
|                                                                 |                              |                                |                                                                                                                                    |                   |                    | Women 22-29    | 56.6 ± 9.3                    |  |
|                                                                 |                              |                                |                                                                                                                                    |                   |                    | Women 30-39    | 55.6 ± 10.5                   |  |
|                                                                 |                              |                                |                                                                                                                                    |                   |                    | Women 40-49    | 55.0 ± 10.5                   |  |
|                                                                 |                              |                                |                                                                                                                                    |                   |                    | Women 50-59    | 57.9 ± 9.9                    |  |
|                                                                 |                              |                                |                                                                                                                                    |                   |                    | Women 60-69    | 60.4 ± 11.7                   |  |
|                                                                 |                              |                                |                                                                                                                                    |                   |                    | Women 70-79    | 65.0 ± 11.9                   |  |
|                                                                 |                              |                                |                                                                                                                                    |                   |                    | Women 80+      | 71.1 ± 10.4                   |  |
|                                                                 |                              |                                |                                                                                                                                    |                   |                    | Bouts          | Number (n)                    |  |
|                                                                 |                              |                                |                                                                                                                                    |                   |                    | Men 22-29      | 92.5 ± 19.8                   |  |
|                                                                 |                              |                                |                                                                                                                                    |                   |                    | Men 30-39      | 94.3 ± 18.5                   |  |
|                                                                 |                              |                                |                                                                                                                                    |                   |                    | Men 40-49      | 96.6 ± 17.4                   |  |
|                                                                 |                              |                                |                                                                                                                                    |                   |                    | Men 50-59      | 94.3 ± 19.3                   |  |
| Men 60-69                                                       | 88.3 ± 19.2                  |                                |                                                                                                                                    |                   |                    |                |                               |  |
| Men 70-79                                                       | 80.9 ± 17.4                  |                                |                                                                                                                                    |                   |                    |                |                               |  |
| Men 80+                                                         | 77.5 ± 19.5                  |                                |                                                                                                                                    |                   |                    |                |                               |  |
| Women 22-29                                                     | 98.4 ± 15.6                  |                                |                                                                                                                                    |                   |                    |                |                               |  |
| Women 30-39                                                     | 99.9 ± 16.3                  |                                |                                                                                                                                    |                   |                    |                |                               |  |
| Women 40-49                                                     | 99.5 ± 16.2                  |                                |                                                                                                                                    |                   |                    |                |                               |  |
| Women 50-59                                                     | 97.9 ± 16.7                  |                                |                                                                                                                                    |                   |                    |                |                               |  |
| Women 60-69                                                     | 91.9 ± 17.3                  |                                |                                                                                                                                    |                   |                    |                |                               |  |
| Women 70-79                                                     | 89.5 ± 18.2                  |                                |                                                                                                                                    |                   |                    |                |                               |  |
| Women 80+                                                       | 84.4 ± 19.3                  |                                |                                                                                                                                    |                   |                    |                |                               |  |
|                                                                 | Bout Length (min)            |                                |                                                                                                                                    |                   |                    |                |                               |  |

Pattern measures of sedentary behavior in adults: A literature review.

| Study                                                                                 | Population                                   | Sensor & settings                                                                   | Data cleaning                                                                       | SB classification | SB pattern measure                                       | Unit                                                                            | Per subject / day (mean ± SD) |
|---------------------------------------------------------------------------------------|----------------------------------------------|-------------------------------------------------------------------------------------|-------------------------------------------------------------------------------------|-------------------|----------------------------------------------------------|---------------------------------------------------------------------------------|-------------------------------|
|                                                                                       |                                              |                                                                                     |                                                                                     |                   |                                                          | Men 22-29                                                                       | 4.89 ± 1.76                   |
|                                                                                       |                                              |                                                                                     |                                                                                     |                   |                                                          | Men 30-39                                                                       | 5.15 ± 2.02                   |
|                                                                                       |                                              |                                                                                     |                                                                                     |                   |                                                          | Men 40-49                                                                       | 4.89 ± 1.47                   |
|                                                                                       |                                              |                                                                                     |                                                                                     |                   |                                                          | Men 50-59                                                                       | 5.69 ± 2.02                   |
|                                                                                       |                                              |                                                                                     |                                                                                     |                   |                                                          | Men 60-69                                                                       | 6.15 ± 2.04                   |
|                                                                                       |                                              |                                                                                     |                                                                                     |                   |                                                          | Men 70-79                                                                       | 7.24 ± 2.63                   |
|                                                                                       |                                              |                                                                                     |                                                                                     |                   |                                                          | Men 80+                                                                         | 9.07 ± 4.37                   |
|                                                                                       |                                              |                                                                                     |                                                                                     |                   |                                                          | Women 22-29                                                                     | 4.80 ± 1.14                   |
|                                                                                       |                                              |                                                                                     |                                                                                     |                   |                                                          | Women 30-39                                                                     | 4.82 ± 1.48                   |
|                                                                                       |                                              |                                                                                     |                                                                                     |                   |                                                          | Women 40-49                                                                     | 4.83 ± 1.30                   |
|                                                                                       |                                              |                                                                                     |                                                                                     |                   |                                                          | Women 50-59                                                                     | 5.23 ± 1.50                   |
|                                                                                       |                                              |                                                                                     |                                                                                     |                   |                                                          | Women 60-69                                                                     | 5.82 ± 2.14                   |
|                                                                                       |                                              |                                                                                     |                                                                                     |                   |                                                          | Women 70-79                                                                     | 6.79 ± 3.50                   |
|                                                                                       |                                              |                                                                                     |                                                                                     |                   |                                                          | Women 80+                                                                       | 7.58 ± 2.71                   |
| (Sebastien F. M. Chastin e.a., 2015)                                                  | N=53<br>Age = 73.7 ± 8.8<br><br>Older adults | ActiGraph GT1M<br>Epoch: 1 min                                                      | ≥10h/d<br>≥3d PRE-intervention<br>≥3d POST-intervention<br><br>Only baseline period | <100 cpm          | Total SB                                                 | % of wear-time                                                                  | 68.0 ± 10.1                   |
|                                                                                       |                                              |                                                                                     |                                                                                     |                   | Bouts                                                    | Number (n)                                                                      | 35.5 ± 7.2                    |
|                                                                                       |                                              |                                                                                     |                                                                                     |                   |                                                          | BL (min) (median)                                                               | 5.12 ± 1.03                   |
|                                                                                       |                                              |                                                                                     |                                                                                     |                   |                                                          | % of Total SB                                                                   |                               |
|                                                                                       |                                              |                                                                                     |                                                                                     |                   |                                                          | BL: 19.8 ± 6.4 (W <sub>50%</sub> )                                              | 50.0                          |
|                                                                                       |                                              |                                                                                     |                                                                                     |                   |                                                          | α (slope of the frequency distribution of bout duration)                        | 1.93 ± 0.15                   |
|                                                                                       |                                              |                                                                                     |                                                                                     |                   |                                                          | Fragmentation of sedentary bouts (F <sub>sed</sub> ) = bouts per SB hour (n/SH) | 10.7 ± 2.4                    |
|                                                                                       |                                              |                                                                                     |                                                                                     |                   | Breaks                                                   | Break Length ('period') (min) (log-mean)                                        | 14.4 ± 2.6                    |
|                                                                                       |                                              |                                                                                     |                                                                                     |                   |                                                          |                                                                                 |                               |
|                                                                                       |                                              |                                                                                     |                                                                                     |                   |                                                          |                                                                                 |                               |
| N=36<br>Age = 43.0 ± 10.3<br>Office workers<br>Groups:<br>- Intervention<br>- Control | ActiGraph GT3X+<br>Epoch: 1 min              | ≥10h/d<br>≥3d PRE-intervention<br>≥3d POST-intervention<br><br>Only baseline period | < 100 cpm                                                                           | Total SB          | % of wear-time                                           | 63.9 ± 9.4                                                                      |                               |
|                                                                                       |                                              |                                                                                     |                                                                                     | Bouts             | Number (n)                                               | 26.6 ± 11.8                                                                     |                               |
|                                                                                       |                                              |                                                                                     |                                                                                     |                   | BL (min) (median)                                        | 8.22 ± 9.1                                                                      |                               |
|                                                                                       |                                              |                                                                                     |                                                                                     |                   | % of Total SB                                            |                                                                                 |                               |
|                                                                                       |                                              |                                                                                     |                                                                                     |                   | BL: 27.1 ± 18.5 (W <sub>50%</sub> )                      | 50.0                                                                            |                               |
|                                                                                       |                                              |                                                                                     |                                                                                     |                   | α (slope of the frequency distribution of bout duration) | 1.39 ± 0.14                                                                     |                               |
|                                                                                       |                                              |                                                                                     |                                                                                     |                   |                                                          |                                                                                 |                               |

**Pattern measures of sedentary behavior in adults: A literature review.**

| Study                 | Population                                                                                                         | Sensor & settings                                                       | Data cleaning                                                                        | SB classification | SB pattern measure | Unit                                                                                     | Per subject / day (mean ± SD)                            |
|-----------------------|--------------------------------------------------------------------------------------------------------------------|-------------------------------------------------------------------------|--------------------------------------------------------------------------------------|-------------------|--------------------|------------------------------------------------------------------------------------------|----------------------------------------------------------|
|                       |                                                                                                                    |                                                                         |                                                                                      |                   |                    | Fragmentation of sedentary bouts (F <sub>sed</sub> ) = bouts per SB hour (n/SH)          | 5.72 ± 3.79                                              |
|                       |                                                                                                                    |                                                                         |                                                                                      |                   | Breaks             | Break Length ('period') (min) (log-mean)                                                 | 5.11 ± 4.1                                               |
|                       |                                                                                                                    | ActivPAL                                                                | ≥10h/d<br>≥3d PRE-intervention<br>≥3d POST-intervention                              | S                 | Total SB           | % of wear-time                                                                           | 69.4 ± 9.1                                               |
|                       |                                                                                                                    |                                                                         | Only baseline period                                                                 |                   | Bouts              | Number (n)                                                                               | 33.0 ± 10.4                                              |
|                       |                                                                                                                    |                                                                         |                                                                                      |                   |                    | BL (min) (median)                                                                        | 6.86 ± 3.0                                               |
|                       |                                                                                                                    |                                                                         |                                                                                      |                   |                    | % of Total SB<br>BL: 21.9 ± 7.7 (W <sub>50%</sub> )                                      | 50.0                                                     |
|                       |                                                                                                                    |                                                                         |                                                                                      |                   |                    | α (slope of the frequency distribution of bout duration)                                 | 1.37 ± 0.03                                              |
|                       |                                                                                                                    |                                                                         |                                                                                      |                   |                    | Fragmentation of sedentary bouts (F <sub>sed</sub> ) = bouts per SB hour (n/SH)          | 6.0 ± 2.7                                                |
|                       |                                                                                                                    |                                                                         |                                                                                      |                   | Breaks             | Break Length ('period') (min) (log-mean)                                                 | 4.92 ± 1.7                                               |
| (Chen e.a., 2016)     | N = 1634<br>Age = 73.3 ± 6.0<br><br>Older adults<br><br>Groups:<br>- disability in IADL<br>- no disability in IADL | Active stylePro HJA-350IT<br>Epoch: 1 minute<br>On either side of waist | ≥10h/d (waking hours) ≥4d<br>Non-wear (≥60 min <1.0 METs, with gap (2min ≥1.0 METs)) | ≤ 1.5 METs        | Wear-time          | Hours (h)<br>All subjects<br>Disability in IADL YES<br>Disability in IADL NO             | 14.0 ± 1.8<br>13.8 ± 1.9<br>14.0 ± 1.8                   |
|                       |                                                                                                                    |                                                                         |                                                                                      |                   | Total SB           | Hours (h)<br>All subjects<br>Disability in IADL YES<br>Disability in IADL NO             | 7.72 ± 2.1<br>8.73 ± 2.34<br>7.63 ± 2.04                 |
|                       |                                                                                                                    |                                                                         |                                                                                      |                   | Breaks             | Number (n)<br>All subjects<br>Disability in IADL YES<br>Disability in IADL NO            | 59.0 ± 13.2<br>54.5 ± 13.2<br>59.4 ± 13.1                |
| (Claridge e.a., 2015) | N = 42<br>Age = 33.5 ± 12<br><br>Adults with Cerebral Palsy (CP)                                                   | ActiGraph GT3X<br>Epoch: 3 sec                                          | ≥5h/d (waking hours) ≥4d<br>Non-wear (diary)                                         | <100 cpm          | Wear-time          | Hours (h)<br>All subjects<br>CP-GMFCS level I<br>CP-GMFCS level II<br>CP-GMFCS level III | 10.50 ± 2.1<br>12.08 ± 2.2<br>12.38 ± 2.1<br>10.14 ± 1.8 |

**Pattern measures of sedentary behavior in adults: A literature review.**

| Study               | Population                                                                                                                | Sensor & settings              | Data cleaning                                          | SB classification | SB pattern measure | Unit               | Per subject / day (mean ± SD) |
|---------------------|---------------------------------------------------------------------------------------------------------------------------|--------------------------------|--------------------------------------------------------|-------------------|--------------------|--------------------|-------------------------------|
|                     |                                                                                                                           |                                |                                                        |                   |                    | CP-GMFCS level IV  | 11.16 ± 2.1                   |
|                     |                                                                                                                           |                                |                                                        |                   |                    | CP-GMFCS level V   | 11.67 ± 2.1                   |
|                     | Groups:<br>- CP-GMFCS level I<br>- CP-GMFCS level II<br>- CP-GMFCS level III<br>- CP-GMFCS level IV<br>- CP-GMFCS level V |                                |                                                        |                   | Total SB           | Hours (h)          |                               |
|                     |                                                                                                                           |                                |                                                        |                   |                    | All subjects       | 10.50 ± 2.0                   |
|                     |                                                                                                                           |                                |                                                        |                   |                    | CP-GMFCS level I   | 9.82 ± 1.09                   |
|                     |                                                                                                                           |                                |                                                        |                   |                    | CP-GMFCS level II  | 10.97 ± 0.45                  |
|                     |                                                                                                                           |                                |                                                        |                   |                    | CP-GMFCS level III | 9.49 ± 0.33                   |
|                     |                                                                                                                           |                                |                                                        |                   |                    | CP-GMFCS level IV  | 10.90 ± 0.19                  |
|                     |                                                                                                                           |                                |                                                        |                   |                    | CP-GMFCS level V   | 11.51 ± 0.09                  |
|                     |                                                                                                                           |                                |                                                        |                   | Breaks             | Number (n)         |                               |
|                     |                                                                                                                           |                                |                                                        |                   |                    | All subjects       | n.a.                          |
|                     |                                                                                                                           |                                |                                                        |                   |                    | CP-GMFCS level I   | 24.4                          |
|                     |                                                                                                                           |                                |                                                        |                   |                    | CP-GMFCS level II  | 16.0                          |
|                     |                                                                                                                           |                                |                                                        |                   |                    | CP-GMFCS level III | 7.6                           |
|                     |                                                                                                                           |                                |                                                        |                   |                    | CP-GMFCS level IV  | 3.3                           |
|                     |                                                                                                                           |                                |                                                        |                   |                    | CP-GMFCS level V   | 2.4                           |
|                     |                                                                                                                           |                                |                                                        |                   |                    | Break-rate (n/SH)  |                               |
|                     |                                                                                                                           |                                |                                                        |                   |                    | All subjects       | n.a.                          |
|                     |                                                                                                                           |                                |                                                        |                   |                    | CP-GMFCS level I   | 2.63 ± 1.99                   |
|                     |                                                                                                                           |                                |                                                        |                   |                    | CP-GMFCS level II  | 1.46 ± 0.62                   |
|                     |                                                                                                                           |                                |                                                        |                   |                    | CP-GMFCS level III | 0.82 ± 0.43                   |
|                     |                                                                                                                           |                                |                                                        |                   |                    | CP-GMFCS level IV  | 0.31 ± 0.18                   |
|                     |                                                                                                                           |                                |                                                        |                   |                    | CP-GMFCS level V   | 0.20 ± 0.095                  |
| (Cooper e.a., 2012) | N = 528<br>Age: 59.8 ± 10.0<br>Type 2 diabetes                                                                            | Actigraph GT1M<br>Epoch: 1 min | ≥ 3d; Waking hours > 10h/d<br>Non wear (≥20 min zeros) | < 100 cpm         | Total SB           | (hours)            |                               |
|                     |                                                                                                                           |                                |                                                        |                   |                    | All subjects       | 8.1 ± 1.3                     |
|                     |                                                                                                                           |                                |                                                        |                   |                    | Men                | 8.0 ± 1.2                     |
|                     |                                                                                                                           |                                |                                                        |                   |                    | Women              | 8.1 ± 1.3                     |
|                     |                                                                                                                           |                                |                                                        |                   | Breaks             | Number (n)         |                               |
|                     |                                                                                                                           |                                |                                                        |                   |                    | All subjects       | 82.9 ± 13.3                   |
|                     |                                                                                                                           |                                |                                                        |                   |                    | Men                | 87.3 ± 15.7                   |
|                     |                                                                                                                           |                                |                                                        |                   |                    | Women              | 85.2 ± 14.5                   |
|                     |                                                                                                                           |                                |                                                        |                   |                    | Number (n/SH)      |                               |
|                     |                                                                                                                           |                                |                                                        |                   |                    | All subjects       | 10.7 ± 2.3                    |
|                     | N = 217                                                                                                                   | ActiGraph GT1M                 | ≥10h/d; waking hours                                   | <100 cpm          | Wear-time          | Hours (h)          |                               |

**Pattern measures of sedentary behavior in adults: A literature review.**

| Study              | Population                       | Sensor & settings                                                 | Data cleaning                              | SB classification | SB pattern measure | Unit         | Per subject / day (mean ± SD) |             |
|--------------------|----------------------------------|-------------------------------------------------------------------|--------------------------------------------|-------------------|--------------------|--------------|-------------------------------|-------------|
| (Davis e.a., 2014) | Age = 78.1 ± 5.8<br>Older adults | Epoch: 10 sec → 1min                                              | ≥5d<br>Non-wear (>100 min zeros)           |                   |                    | All subjects | 14.1 ± 1.4                    |             |
|                    |                                  |                                                                   |                                            |                   |                    | Men          | 14.7 ± 1.5                    |             |
|                    |                                  |                                                                   |                                            |                   |                    |              | Women                         | 14.2 ± 1.2  |
|                    |                                  |                                                                   |                                            |                   |                    | Total SB     | % of wear-time (%)            |             |
|                    |                                  |                                                                   |                                            |                   |                    |              | All subjects                  | 71.3 ± 0.10 |
|                    |                                  |                                                                   |                                            |                   |                    |              | Men                           | 72.0 ± 0.10 |
|                    |                                  |                                                                   |                                            |                   |                    |              | Women                         | 70.7 ± 0.10 |
|                    |                                  |                                                                   |                                            |                   |                    | Breaks       | Number (n)                    |             |
|                    |                                  |                                                                   |                                            |                   |                    |              | All subjects                  | 72.8 ± 16.2 |
|                    |                                  |                                                                   |                                            |                   |                    |              | Men                           | n.a.        |
|                    |                                  |                                                                   |                                            |                   |                    |              | Women                         | n.a.        |
|                    |                                  |                                                                   |                                            |                   |                    |              | Break-rate (n/wear-time(h))   |             |
|                    |                                  |                                                                   |                                            |                   |                    |              | All subjects                  | 5.0 ± 1.0   |
|                    |                                  |                                                                   |                                            |                   |                    | Men          | 4.8 ± 1.0                     |             |
|                    |                                  |                                                                   |                                            |                   |                    | Women        | 5.2 ± 1.1                     |             |
| (Diaz e.a., 2016)  | N = 8096<br>Age ≥ 45y            | Actical<br>Secured to a nylon belt; on right hip<br>Epoch = 1 min | ≥10h/d<br>≥4d<br>Non-wear (≥150 min zeros) | <50 cpm           |                    | Wear-time    | Hours (h)                     | 14.4 ± 2.0  |
|                    |                                  |                                                                   |                                            |                   |                    | Total SB     | Hours (h)                     | 11.2 ± 2.1  |
|                    |                                  |                                                                   |                                            |                   |                    | Bouts        | BL (min) (mean)               | 11.4 ± 8.1  |
|                    |                                  |                                                                   |                                            |                   |                    |              | BL (min) (median)             | 9.7 ± 2.3   |
|                    |                                  |                                                                   |                                            |                   |                    |              | Number (n)                    |             |
|                    |                                  |                                                                   |                                            |                   |                    |              | All subjects                  |             |
|                    |                                  |                                                                   |                                            |                   |                    |              | BL: >1 min                    | 68.3 ± 20.0 |
|                    |                                  |                                                                   |                                            |                   |                    |              | BL: ≥5 min                    | 28.0 ± 5.9  |
|                    |                                  |                                                                   |                                            |                   |                    |              | BL: ≥10 min                   | 16.9 ± 3.4  |
|                    |                                  |                                                                   |                                            |                   |                    |              | BL: ≥20 min                   | 8.8 ± 2.3   |
|                    |                                  |                                                                   |                                            |                   |                    |              | BL: ≥30 min                   | 5.5 ± 1.9   |
|                    |                                  |                                                                   |                                            |                   |                    |              | BL: ≥40 min                   | 3.8 ± 1.6   |
|                    |                                  |                                                                   |                                            |                   |                    |              | BL: ≥50 min                   | 2.6 ± 1.3   |
|                    |                                  |                                                                   |                                            |                   |                    |              | BL: ≥60 min                   | 1.9 ± 1.1   |
|                    |                                  |                                                                   |                                            |                   |                    |              | BL: ≥90 min                   | 0.8 ± 0.7   |
|                    |                                  |                                                                   |                                            |                   |                    |              | Age: 45-54 yr                 |             |
|                    |                                  |                                                                   |                                            |                   |                    |              | BL: >1 min                    | 77.5 ± 17.3 |
|                    |                                  |                                                                   |                                            |                   |                    |              | BL: ≥5 min                    | 28.7 ± 5.8  |
|                    |                                  |                                                                   |                                            |                   |                    |              | BL: ≥10 min                   | 16.2 ± 3.9  |
|                    |                                  |                                                                   |                                            |                   |                    | BL: ≥20 min  | 7.7 ± 2.6                     |             |

Pattern measures of sedentary behavior in adults: A literature review.

| Study | Population | Sensor & settings | Data cleaning | SB classification | SB pattern measure | Unit          | Per subject / day (mean ± SD) |
|-------|------------|-------------------|---------------|-------------------|--------------------|---------------|-------------------------------|
|       |            |                   |               |                   |                    | BL: ≥30 min   | 4.4 ± 1.9                     |
|       |            |                   |               |                   |                    | BL: ≥40 min   | 2.8 ± 1.5                     |
|       |            |                   |               |                   |                    | BL: ≥50 min   | 1.9 ± 1.1                     |
|       |            |                   |               |                   |                    | BL: ≥60 min   | 1.3 ± 0.9                     |
|       |            |                   |               |                   |                    | BL: ≥90 min   | 0.5 ± 0.5                     |
|       |            |                   |               |                   |                    | Age: 55-64 yr |                               |
|       |            |                   |               |                   |                    | BL: >1 min    | 74.0 ± 18.7                   |
|       |            |                   |               |                   |                    | BL: ≥5 min    | 28.8 ± 5.5                    |
|       |            |                   |               |                   |                    | BL: ≥10 min   | 16.7 ± 3.4                    |
|       |            |                   |               |                   |                    | BL: ≥20 min   | 8.3 ± 2.4                     |
|       |            |                   |               |                   |                    | BL: ≥30 min   | 5.0 ± 1.8                     |
|       |            |                   |               |                   |                    | BL: ≥40 min   | 3.3 ± 1.4                     |
|       |            |                   |               |                   |                    | BL: ≥50 min   | 2.2 ± 1.2                     |
|       |            |                   |               |                   |                    | BL: ≥60 min   | 1.6 ± 1.0                     |
|       |            |                   |               |                   |                    | BL: ≥90 min   | 0.6 ± 0.6                     |
|       |            |                   |               |                   |                    | Age: 65-74 yr |                               |
|       |            |                   |               |                   |                    | BL: >1 min    | 69.5 ± 18.7                   |
|       |            |                   |               |                   |                    | BL: ≥5 min    | 28.3 ± 5.5                    |
|       |            |                   |               |                   |                    | BL: ≥10 min   | 16.9 ± 3.3                    |
|       |            |                   |               |                   |                    | BL: ≥20 min   | 8.8 ± 2.2                     |
|       |            |                   |               |                   |                    | BL: ≥30 min   | 5.4 ± 1.8                     |
|       |            |                   |               |                   |                    | BL: ≥40 min   | 3.7 1.5                       |
|       |            |                   |               |                   |                    | BL: ≥50 min   | 2.6 ± 1.3                     |
|       |            |                   |               |                   |                    | BL: ≥60 min   | 1.8 ± 1.1                     |
|       |            |                   |               |                   |                    | BL: ≥90 min   | 0.7 ± 0.6                     |
|       |            |                   |               |                   |                    | Age: ≥75yr    |                               |
|       |            |                   |               |                   |                    | BL: >1 min    | 59.9 ± 20.5                   |
|       |            |                   |               |                   |                    | BL: ≥5 min    | 26.9 6.6                      |
|       |            |                   |               |                   |                    | BL: ≥10 min   | 17.0 ± 3.5                    |
|       |            |                   |               |                   |                    | BL: ≥20 min   | 9.5 ± 2.1                     |
|       |            |                   |               |                   |                    | BL: ≥30 min   | 6.3 ± 1.7                     |
|       |            |                   |               |                   |                    | BL: ≥40 min   | 4.5 ± 1.5                     |
|       |            |                   |               |                   |                    | BL: ≥50 min   | 3.3 ± 1.4                     |
|       |            |                   |               |                   |                    | BL: ≥60 min   | 2.4 ± 1.2                     |
|       |            |                   |               |                   |                    | BL: ≥90 min   | 1.1 ± 0.8                     |
|       |            |                   |               |                   |                    | % of Total SB |                               |
|       |            |                   |               |                   |                    | All subjects  |                               |

Pattern measures of sedentary behavior in adults: A literature review.

| Study | Population | Sensor & settings | Data cleaning | SB classification | SB pattern measure | Unit          | Per subject / day (mean ± SD) |
|-------|------------|-------------------|---------------|-------------------|--------------------|---------------|-------------------------------|
|       |            |                   |               |                   |                    | BL: >1 min    | 100                           |
|       |            |                   |               |                   |                    | BL: ≥5 min    | 88.2 ± 5.7                    |
|       |            |                   |               |                   |                    | BL: ≥10 min   | 76.7 ± 9.7                    |
|       |            |                   |               |                   |                    | BL: ≥20 min   | 60.0 ± 13.9                   |
|       |            |                   |               |                   |                    | BL: ≥30 min   | 48.0 ± 15.5                   |
|       |            |                   |               |                   |                    | BL: ≥40 min   | 39.1 ± 16.0                   |
|       |            |                   |               |                   |                    | BL: ≥50 min   | 31.8 ± 15.9                   |
|       |            |                   |               |                   |                    | BL: ≥60 min   | 26.0 ± 15.4                   |
|       |            |                   |               |                   |                    | BL: ≥90 min   | 14.2 ± 12.9                   |
|       |            |                   |               |                   |                    | Age: 45-54 yr |                               |
|       |            |                   |               |                   |                    | BL: >1 min    | 100                           |
|       |            |                   |               |                   |                    | BL: ≥5 min    | 84.6 ± 6.2                    |
|       |            |                   |               |                   |                    | BL: ≥10 min   | 70.6 ± 10.2                   |
|       |            |                   |               |                   |                    | BL: ≥20 min   | 51.5 ± 13.0                   |
|       |            |                   |               |                   |                    | BL: ≥30 min   | 38.9 ± 13.8                   |
|       |            |                   |               |                   |                    | BL: ≥40 min   | 30.2 ± 13.3                   |
|       |            |                   |               |                   |                    | BL: ≥50 min   | 24.0 ± 12.5                   |
|       |            |                   |               |                   |                    | BL: ≥60 min   | 18.9 ± 11.4                   |
|       |            |                   |               |                   |                    | BL: ≥90 min   | 9.9 ± 8.4                     |
|       |            |                   |               |                   |                    | Age: 55-64 yr |                               |
|       |            |                   |               |                   |                    | BL: >1 min    | 100                           |
|       |            |                   |               |                   |                    | BL: ≥5 min    | 86.4 ± 5.8                    |
|       |            |                   |               |                   |                    | BL: ≥10 min   | 73.6 ± 9.6                    |
|       |            |                   |               |                   |                    | BL: ≥20 min   | 55.6 ± 13.0                   |
|       |            |                   |               |                   |                    | BL: ≥30 min   | 43.2 ± 14.0                   |
|       |            |                   |               |                   |                    | BL: ≥40 min   | 34.2 ± 13.8                   |
|       |            |                   |               |                   |                    | BL: ≥50 min   | 27.2 ± 13.3                   |
|       |            |                   |               |                   |                    | BL: ≥60 min   | 21.8 ± 12.5                   |
|       |            |                   |               |                   |                    | BL: ≥90 min   | 11.4 ± 10.0                   |
|       |            |                   |               |                   |                    | Age: 65-74 yr |                               |
|       |            |                   |               |                   |                    | BL: >1 min    | 100                           |
|       |            |                   |               |                   |                    | BL: ≥5 min    | 87.8 ± 5.4                    |
|       |            |                   |               |                   |                    | BL: ≥10 min   | 76.2 ± 9.2                    |
|       |            |                   |               |                   |                    | BL: ≥20 min   | 59.1 ± 13.0                   |
|       |            |                   |               |                   |                    | BL: ≥30 min   | 46.9 ± 14.4                   |
|       |            |                   |               |                   |                    | BL: ≥40 min   | 37.8 ± 14.7                   |
|       |            |                   |               |                   |                    | BL: ≥50 min   | 30.5 ± 14.5                   |



Pattern measures of sedentary behavior in adults: A literature review.

| Study | Population | Sensor & settings | Data cleaning | SB classification | SB pattern measure | Unit               | Per subject / day (mean ± SD) |
|-------|------------|-------------------|---------------|-------------------|--------------------|--------------------|-------------------------------|
|       |            |                   |               |                   |                    | BL: ≥60 min        | 24.6 ± 13.9                   |
|       |            |                   |               |                   |                    | BL: ≥90 min        | 12.9 ± 11.4                   |
|       |            |                   |               |                   |                    | Age: ≥75yr         |                               |
|       |            |                   |               |                   |                    | BL: >1 min         | 100                           |
|       |            |                   |               |                   |                    | BL: ≥5 min         | 90.8 ± 4.8                    |
|       |            |                   |               |                   |                    | BL: ≥10 min        | 81.2 ± 8.7                    |
|       |            |                   |               |                   |                    | BL: ≥20 min        | 66.6 ± 13.3                   |
|       |            |                   |               |                   |                    | BL: ≥30 min        | 55.5 ± 15.8                   |
|       |            |                   |               |                   |                    | BL: ≥40 min        | 46.7 ± 17.1                   |
|       |            |                   |               |                   |                    | BL: ≥50 min        | 39.2 ± 17.6                   |
|       |            |                   |               |                   |                    | BL: ≥60 min        | 32.8 ± 17.6                   |
|       |            |                   |               |                   |                    | BL: ≥90 min        | 19.2 ± 16.1                   |
|       |            |                   |               |                   |                    | Female             |                               |
|       |            |                   |               |                   |                    | BL: ≥30 min        | 46.7 ± 15.6                   |
|       |            |                   |               |                   |                    | BL: ≥60 min        | 25.1 ± 15.2                   |
|       |            |                   |               |                   |                    | BL: ≥90 min        | 13.9 ± 12.8                   |
|       |            |                   |               |                   |                    | Male               |                               |
|       |            |                   |               |                   |                    | BL: ≥30 min        | 49.7 ± 15.3                   |
|       |            |                   |               |                   |                    | BL: ≥60 min        | 27.0 ± 15.4                   |
|       |            |                   |               |                   |                    | BL: ≥90 min        | 14.5 ± 13.0                   |
|       |            |                   |               |                   |                    | BMI: underweight   |                               |
|       |            |                   |               |                   |                    | BL: ≥30 min        | 43.9 ± 15.7                   |
|       |            |                   |               |                   |                    | BL: ≥60 min        | 22.7 ± 13.6                   |
|       |            |                   |               |                   |                    | BL: ≥90 min        | 12.5 ± 11.8                   |
|       |            |                   |               |                   |                    | BMI: normal weight |                               |
|       |            |                   |               |                   |                    | BL: ≥30 min        | 45.1 ± 15.8                   |
|       |            |                   |               |                   |                    | BL: ≥60 min        | 23.7 ± 15.1                   |
|       |            |                   |               |                   |                    | BL: ≥90 min        | 12.6 ± 12.6                   |
|       |            |                   |               |                   |                    | BMI: overweight    |                               |
|       |            |                   |               |                   |                    | BL: ≥30 min        | 47.7 ± 14.9                   |
|       |            |                   |               |                   |                    | BL: ≥60 min        | 25.5 ± 14.6                   |
|       |            |                   |               |                   |                    | BL: ≥90 min        | 13.8 ± 12.3                   |
|       |            |                   |               |                   |                    | BMI: obese         |                               |
|       |            |                   |               |                   |                    | BL: ≥30 min        | 50.7 ± 15.6                   |
|       |            |                   |               |                   |                    | BL: ≥60 min        | 28.2 ± 16.0                   |
|       |            |                   |               |                   |                    | BL: ≥90 min        | 15.8 ± 13.6                   |
|       |            |                   |               |                   | Breaks             | Number (n)         |                               |

Pattern measures of sedentary behavior in adults: A literature review.

| Study | Population | Sensor & settings | Data cleaning           | SB classification | SB pattern measure | Unit               | Per subject / day (mean ± SD) |
|-------|------------|-------------------|-------------------------|-------------------|--------------------|--------------------|-------------------------------|
|       |            |                   |                         |                   |                    | All subjects       | 68.8 ± 20.0                   |
|       |            |                   |                         |                   |                    | Age: 45-54         | 78.0 ± 17.3                   |
|       |            |                   |                         |                   |                    | Age: 55-64         | 74.6 ± 18.7                   |
|       |            |                   |                         |                   |                    | Age: 65-74         | 70.1 ± 18.7                   |
|       |            |                   |                         |                   |                    | Age: ≥75           | 60.4 ± 20.6                   |
|       |            |                   |                         |                   |                    | Female             | 70.6 ± 20.5                   |
|       |            |                   |                         |                   |                    | Male               | 66.7 ± 19.3                   |
|       |            |                   |                         |                   |                    | BMI: underweight   | 76.5 ± 22.0                   |
|       |            |                   |                         |                   |                    | BMI: normal weight | 73.5 ± 20.6                   |
|       |            |                   |                         |                   |                    | BMI: overweight    | 69.4 ± 18.9                   |
|       |            |                   |                         |                   |                    | BMI: obese         | 64.5 ± 19.9                   |
|       |            |                   |                         |                   |                    | Breakrate (n/SH)   |                               |
|       |            |                   |                         |                   |                    | All subjects       | 6.4 ± 2.4                     |
|       |            |                   |                         |                   |                    | Age: 45-54         | 8.0 ± 2.5                     |
|       |            |                   |                         |                   |                    | Age: 55-64         | 7.2 ± 2.3                     |
|       |            |                   |                         |                   |                    | Age: 65-74         | 6.6 ± 2.2                     |
|       |            |                   |                         |                   |                    | Age: ≥75           | 5.3 ± 2.1                     |
|       |            |                   |                         |                   |                    | Female             | 6.6 ± 2.4                     |
|       |            |                   |                         |                   |                    | Male               | 6.2 ± 2.3                     |
|       |            |                   |                         |                   |                    | BMI: underweight   | 6.9 ± 2.6                     |
|       |            |                   |                         |                   |                    | BMI: normal weight | 6.9 ± 2.5                     |
|       |            |                   |                         |                   |                    | BMI: overweight    | 6.5 ± 2.3                     |
|       |            |                   |                         |                   |                    | BMI: obese         | 6.0 ± 2.3                     |
|       |            |                   |                         |                   |                    | Duration (min)     |                               |
|       |            |                   |                         |                   |                    | All subjects       | 2.8 ± 0.8                     |
|       |            |                   |                         |                   |                    | Age: 45-54         | 3.4 ± 0.9                     |
|       |            |                   |                         |                   |                    | Age: 55-64         | 3.0 ± 0.8                     |
|       |            |                   |                         |                   |                    | Age: 65-74         | 2.8 ± 0.8                     |
|       |            |                   |                         |                   |                    | Age: ≥75           | 2.3 ± 0.6                     |
|       |            |                   |                         |                   |                    | Female             | 2.6 ± 0.7                     |
|       |            |                   |                         |                   |                    | Male               | 2.9 ± 0.9                     |
|       |            |                   |                         |                   |                    | BMI: underweight   | 2.6 ± 0.8                     |
|       |            |                   |                         |                   |                    | BMI: normal weight | 2.8 ± 0.8                     |
|       |            |                   |                         |                   |                    | BMI: overweight    | 2.8 ± 0.8                     |
|       |            |                   |                         |                   |                    | BMI: obese         | 2.7 ± 0.8                     |
|       | N = 439    | ActiGraph 7164    | ≥3d during waking hours | <100 cpm          | Wear-time          | Hours (h)          |                               |

**Pattern measures of sedentary behavior in adults: A literature review.**

| Study                                             | Population                                                                                                                  | Sensor & settings                                                     | Data cleaning                                                           | SB classification | SB pattern measure              | Unit                            | Per subject / day (mean ± SD)  |
|---------------------------------------------------|-----------------------------------------------------------------------------------------------------------------------------|-----------------------------------------------------------------------|-------------------------------------------------------------------------|-------------------|---------------------------------|---------------------------------|--------------------------------|
| (Ezeugwu, Klaren, A Hubbard, Manns, & Motl, 2015) | Age = 47.3 ± 10.0 yrs<br>Adults with MS:<br>- mobility disability absent (PDDS≤2)<br>- mobility disability present (PDDS≥3) | Epoch = 1 minute<br>On belt around the waist, on the non-dominant hip | ≥10h/d wear-time<br>Non-wear (≥60 min zeros)                            |                   |                                 | MS, mobility disability absent  | 14.01 ± 0.11                   |
|                                                   |                                                                                                                             |                                                                       |                                                                         |                   |                                 | MS, mobility disability present | 13.79 ± 0.14                   |
|                                                   |                                                                                                                             |                                                                       |                                                                         |                   | Total SB                        | Hours (h)                       |                                |
|                                                   |                                                                                                                             |                                                                       |                                                                         |                   |                                 | MS, mobility disability absent  | 8.41 ± 0.08                    |
|                                                   |                                                                                                                             |                                                                       |                                                                         |                   |                                 | MS, mobility disability present | 8.89 ± 0.09                    |
|                                                   |                                                                                                                             |                                                                       |                                                                         |                   |                                 | Bouts (≥2min)                   | BL (min)                       |
|                                                   |                                                                                                                             |                                                                       |                                                                         |                   | MS, mobility disability absent  |                                 | 23.8 ± 1.1                     |
|                                                   |                                                                                                                             |                                                                       |                                                                         |                   |                                 | MS, mobility disability present | 24.2 ± 1.3                     |
|                                                   |                                                                                                                             |                                                                       |                                                                         |                   |                                 | Number(n); BL >30 min           | MS, mobility disability absent |
|                                                   |                                                                                                                             |                                                                       |                                                                         |                   | MS, mobility disability present |                                 | 5.1 ± 0.1                      |
| Breaks (≥2min)                                    | Number (n)                                                                                                                  |                                                                       |                                                                         |                   |                                 |                                 |                                |
|                                                   | MS, mobility disability absent                                                                                              | 13.7 ± 0.2                                                            |                                                                         |                   |                                 |                                 |                                |
|                                                   | MS, mobility disability present                                                                                             | 14.7 ± 0.2                                                            |                                                                         |                   |                                 |                                 |                                |
|                                                   | Duration (min)                                                                                                              | MS, mobility disability absent                                        | 12.8 ± 0.1                                                              |                   |                                 |                                 |                                |
| MS, mobility disability present                   |                                                                                                                             | 11.6 ± 0.1                                                            |                                                                         |                   |                                 |                                 |                                |
| (Falconer, Page, Andrews, & Cooper, 2015)         | N = 519<br>Age = 59.9 ± 9.9<br>Adults with type 2 Diabetes                                                                  | ActiGraph GT1M<br>Epoch = 1 min<br>Waist-worn belt                    | ≥3d during waking hours<br>≥10h/d wear-time<br>Non-wear (≥60 min zeros) | <100 cpm          | Wear-time                       | Hours(h)                        | 14.02 ± 1.22                   |
|                                                   |                                                                                                                             |                                                                       |                                                                         |                   | Total SB                        | Hours(h)                        | 9.06 ± 1.39                    |
|                                                   |                                                                                                                             |                                                                       |                                                                         |                   | Bouts                           | % of Total SB                   |                                |
|                                                   |                                                                                                                             |                                                                       |                                                                         |                   |                                 | BL: ≥30 min                     | 54                             |
|                                                   |                                                                                                                             |                                                                       |                                                                         |                   | BL: <30 min                     | 46                              |                                |
| (Fanning e.a., 2016)                              | N = 221<br>Age = 70.7 ± 4.7<br>Low active older adults<br>- Intervention<br>- Controls                                      | ActiGraph GT1M or GT3X<br>Epoch = 1 min<br>On non-dominant hip        | ≥3d during waking hours<br>≥10h/d wear-time                             | <100 cpm          | Total SB                        | Hours(h)                        |                                |
|                                                   |                                                                                                                             |                                                                       |                                                                         |                   |                                 | Intervention; month 0           | 9.94 ± 1.61                    |
|                                                   |                                                                                                                             |                                                                       |                                                                         |                   |                                 | Intervention; month 6           | 9.89 ± 1.21                    |
|                                                   |                                                                                                                             |                                                                       |                                                                         |                   |                                 | Intervention; month 12          | 9.97 ± 1.41                    |
|                                                   |                                                                                                                             |                                                                       |                                                                         |                   |                                 | Control; month 0                | 9.77 ± 1.38                    |
|                                                   |                                                                                                                             |                                                                       |                                                                         |                   |                                 | Control; month 6                | 9.69 ± 1.27                    |
|                                                   |                                                                                                                             |                                                                       |                                                                         |                   |                                 | Control; month 12               | 9.76 ± 1.23                    |
|                                                   |                                                                                                                             |                                                                       |                                                                         |                   |                                 | Breaks                          | Number(n)                      |
|                                                   |                                                                                                                             |                                                                       |                                                                         |                   | Intervention; month 0           |                                 | 78.31 ± 16.11                  |
|                                                   |                                                                                                                             |                                                                       |                                                                         |                   |                                 | Intervention; month 6           | 79.48 ± 15.12                  |
| Intervention; month 12                            | 77.99 ± 16.43                                                                                                               |                                                                       |                                                                         |                   |                                 |                                 |                                |

**Pattern measures of sedentary behavior in adults: A literature review.**

| Study                                           | Population                   | Sensor & settings                                                                        | Data cleaning                                                                                   | SB classification | SB pattern measure | Unit                    | Per subject / day (mean ± SD) |  |
|-------------------------------------------------|------------------------------|------------------------------------------------------------------------------------------|-------------------------------------------------------------------------------------------------|-------------------|--------------------|-------------------------|-------------------------------|--|
|                                                 |                              |                                                                                          |                                                                                                 |                   |                    | Control; month 0        | 80.10 ± 15.95                 |  |
|                                                 |                              |                                                                                          |                                                                                                 |                   |                    | Control; month 6        | 78.61 ± 15.51                 |  |
|                                                 |                              |                                                                                          |                                                                                                 |                   |                    | Control; month 12       | 75.42 ± 17.07                 |  |
| (García-Hermoso, Notario-Pacheco, e.a., 2015)   | N = 1365<br>Age = 20-80 yrs  | ActiGraph GT3X<br>Vector magnitude<br>Elastic belt; right side of waist                  | ≥4d (≥ 1 weekend-day)<br>≥10h/d wear-time<br>Non-wear (≥60 min zeros, with gap (2min <100 cpm)) | <100 cpm          | Wear-time          | Hours(h)                |                               |  |
|                                                 |                              |                                                                                          |                                                                                                 |                   |                    | All subjects            | 15,52 ± 3.65                  |  |
|                                                 |                              |                                                                                          |                                                                                                 |                   |                    | Men                     | 15,69 ± 3.85                  |  |
|                                                 |                              |                                                                                          |                                                                                                 |                   |                    | Women                   | 15,41 ± 3.51                  |  |
|                                                 |                              |                                                                                          |                                                                                                 |                   |                    | Total SB                | Hours(h)                      |  |
|                                                 |                              |                                                                                          |                                                                                                 |                   |                    | All subjects            | 9,67 ± 2.93                   |  |
|                                                 |                              |                                                                                          |                                                                                                 |                   |                    | Men                     | 10,03 ± 3.11                  |  |
|                                                 |                              |                                                                                          |                                                                                                 |                   |                    | Women                   | 9,45 ± 2.79                   |  |
|                                                 |                              |                                                                                          |                                                                                                 |                   |                    | Bouts                   | % of Total SB (%)             |  |
|                                                 |                              |                                                                                          |                                                                                                 |                   |                    | All subjects            | 77,0                          |  |
|                                                 |                              |                                                                                          |                                                                                                 |                   |                    | Men                     | 75,5                          |  |
|                                                 |                              |                                                                                          |                                                                                                 |                   |                    | Women                   | 77,9                          |  |
|                                                 |                              |                                                                                          |                                                                                                 |                   |                    | Breaks                  | Number (n)                    |  |
|                                                 |                              |                                                                                          |                                                                                                 |                   |                    | All subjects            | 74.4 ± 14.3                   |  |
| Men                                             | 77.3 ± 13.3                  |                                                                                          |                                                                                                 |                   |                    |                         |                               |  |
| Women                                           | 72.9 ± 15.7                  |                                                                                          |                                                                                                 |                   |                    |                         |                               |  |
|                                                 |                              |                                                                                          |                                                                                                 |                   |                    | Breakrate (n/SH)        |                               |  |
|                                                 |                              |                                                                                          |                                                                                                 |                   |                    | All subjects            | 3.4 ± 1.5                     |  |
|                                                 |                              |                                                                                          |                                                                                                 |                   |                    | Men                     | 4.4 ± 1.1                     |  |
|                                                 |                              |                                                                                          |                                                                                                 |                   |                    | Women                   | 2.9 ± 1.2                     |  |
| (García-Hermoso, Martínez-Vizcaino, e.a., 2015) | N = 263<br>Age = 55.8 ± 12.2 | ActiGraph GT3X<br>Vector magnitude<br>Elastic band; right side of waist<br>Epoch = 1 min | ≥4d (≥ 1 weekend-day)<br>≥10h/d wear-time<br>Non-wear (≥10 min zeros)                           | <100 cpm          | Total SB           | Hours(h)                |                               |  |
|                                                 |                              |                                                                                          |                                                                                                 |                   |                    | All subjects            | 8.46 ± 2.01                   |  |
|                                                 |                              |                                                                                          |                                                                                                 |                   |                    | Men                     | 9.15 ± 1.98                   |  |
|                                                 |                              |                                                                                          |                                                                                                 |                   |                    | Women                   | 8.03 ± 1.92                   |  |
|                                                 |                              |                                                                                          |                                                                                                 |                   |                    | Bouts                   | Number (n)                    |  |
|                                                 |                              |                                                                                          |                                                                                                 |                   |                    | BL ≥10min; All subjects | 14.4 ± 4.8                    |  |
|                                                 |                              |                                                                                          |                                                                                                 |                   |                    | BL ≥10min; Men          | 14.2 ± 3.9                    |  |
|                                                 |                              |                                                                                          |                                                                                                 |                   |                    | BL ≥10min; Women        | 14.5 ± 5.3                    |  |
|                                                 |                              |                                                                                          |                                                                                                 |                   |                    | % of Total SB (%)       |                               |  |
|                                                 |                              |                                                                                          |                                                                                                 |                   |                    | BL ≥10min; All subjects | 76.8 ± 29.9                   |  |
| BL ≥10min; Men                                  | 70.6 ± 26.5                  |                                                                                          |                                                                                                 |                   |                    |                         |                               |  |

**Pattern measures of sedentary behavior in adults: A literature review.**

| Study                                                | Population                                                                                                   | Sensor & settings                                                  | Data cleaning                                                                              | SB classification                                                        | SB pattern measure            | Unit                          | Per subject / day (mean ± SD) |  |  |                               |                  |
|------------------------------------------------------|--------------------------------------------------------------------------------------------------------------|--------------------------------------------------------------------|--------------------------------------------------------------------------------------------|--------------------------------------------------------------------------|-------------------------------|-------------------------------|-------------------------------|--|--|-------------------------------|------------------|
|                                                      |                                                                                                              |                                                                    |                                                                                            |                                                                          |                               | BL ≥10min; Women              | 81.3 ± 32.4                   |  |  |                               |                  |
| (Gardiner, Eakin, Healy, & Owen, 2011)               | N = 59<br>Age: 74.3 ± 9.3<br><br>Older adults<br>Intervention on breaking up SB time                         | Actigraph GT1M                                                     | 6+6d<br>≥10h/d                                                                             | < 100 cpm                                                                | Total SB                      | % of wear time (%)            |                               |  |  |                               |                  |
|                                                      |                                                                                                              |                                                                    |                                                                                            |                                                                          |                               | PRE                           | 71.1 ± 8.9                    |  |  |                               |                  |
|                                                      |                                                                                                              |                                                                    |                                                                                            |                                                                          | POST (mean (95% CI))          | 67.9 (66.9, 69.0)             |                               |  |  |                               |                  |
|                                                      |                                                                                                              |                                                                    |                                                                                            |                                                                          | Breaks                        | Number (n)                    |                               |  |  |                               |                  |
| PRE                                                  | 87.8 ± 14.0                                                                                                  |                                                                    |                                                                                            |                                                                          |                               |                               |                               |  |  |                               |                  |
|                                                      |                                                                                                              |                                                                    |                                                                                            |                                                                          |                               | POST (mean (95% CI))          | 91.8 (89.3, 94.4)             |  |  |                               |                  |
| (Gennuso, Gangnon, Thraen-Borowski, & Colbert, 2014) | N = 5076<br>Age = 43.8 ± 19.5<br><br>Groups:<br>- Subjects <8h/d SB<br>- Subjects ≥8h/d SB                   | ActiGraph AM-7164<br>Elastic belt, over right hip<br>Epoch = 1 min | ≥1d Waking hours<br>≥10h/d wear-time<br>Non-wear (≥60 min zeros, with gap (2min <100 cpm)) | ≥100 cpm                                                                 | Total SB                      | Hours(h)                      |                               |  |  |                               |                  |
|                                                      |                                                                                                              |                                                                    |                                                                                            |                                                                          |                               | All subjects (mean ± SD)      | 8.2 ± 2.3                     |  |  |                               |                  |
|                                                      |                                                                                                              |                                                                    |                                                                                            |                                                                          |                               | <8 h/d SB (median, 25% - 75%) | 6.6 (5.6 – 7.3)               |  |  |                               |                  |
|                                                      |                                                                                                              |                                                                    |                                                                                            |                                                                          |                               |                               |                               |  |  | ≥8 h/d SB (median, 25% - 75%) | 9.4 (8.7 – 10.6) |
|                                                      |                                                                                                              |                                                                    |                                                                                            |                                                                          | Breaks                        | Number (n)                    |                               |  |  |                               |                  |
|                                                      |                                                                                                              |                                                                    |                                                                                            |                                                                          |                               | All subjects (mean ± SD)      | 90 ± 19                       |  |  |                               |                  |
| <8 h/d SB (median, 25% - 75%)                        | 89 (78 – 100)                                                                                                |                                                                    |                                                                                            |                                                                          |                               |                               |                               |  |  |                               |                  |
|                                                      |                                                                                                              |                                                                    |                                                                                            |                                                                          | ≥8 h/d SB (median, 25% - 75%) | 91 (77 – 104)                 |                               |  |  |                               |                  |
| (Gupta e.a., 2016)                                   | N = 692<br>Age = 45.1 ± 9.9<br>Blue-collar workers<br><br>Time split:<br>- Whole day<br>- Work<br>- Non-work | ActiGraph GT3X+<br>Placed on the right thigh (like the ActivPAL)   | 4d; 24h/d<br>≥10h/d wear-time during waking hours.                                         | If inclination of the thigh is above 45° (Custom classification program) | Wear-time                     | Hours(h)                      |                               |  |  |                               |                  |
|                                                      |                                                                                                              |                                                                    |                                                                                            |                                                                          |                               | Whole day                     | 15.93 ± 1.45                  |  |  |                               |                  |
|                                                      |                                                                                                              |                                                                    |                                                                                            |                                                                          |                               | Work                          | 7.60 ± 1.29                   |  |  |                               |                  |
|                                                      |                                                                                                              |                                                                    |                                                                                            |                                                                          |                               |                               |                               |  |  | Non-work                      | 8.79 ± 1.60      |
|                                                      |                                                                                                              |                                                                    |                                                                                            |                                                                          | Total SB                      | Hours(h)                      |                               |  |  |                               |                  |
|                                                      |                                                                                                              |                                                                    |                                                                                            |                                                                          |                               | Whole day                     | 7.83 ± 2.13                   |  |  |                               |                  |
|                                                      |                                                                                                              |                                                                    |                                                                                            |                                                                          |                               | Work                          | 2.45 ± 1.75                   |  |  |                               |                  |
|                                                      |                                                                                                              |                                                                    |                                                                                            |                                                                          |                               |                               |                               |  |  | Non-work                      | 5.49 ± 1.46      |
|                                                      |                                                                                                              |                                                                    |                                                                                            |                                                                          | Bouts                         | Hours(h)                      |                               |  |  |                               |                  |
|                                                      |                                                                                                              |                                                                    |                                                                                            |                                                                          |                               | Whole day                     |                               |  |  |                               |                  |
|                                                      |                                                                                                              |                                                                    |                                                                                            |                                                                          |                               | BL >30min                     | 3.17 ± 1.67                   |  |  |                               |                  |
|                                                      |                                                                                                              |                                                                    |                                                                                            |                                                                          |                               | BL 6-30min                    | 3.60 ± 1.28                   |  |  |                               |                  |
|                                                      |                                                                                                              |                                                                    |                                                                                            |                                                                          |                               | BL ≤5min                      | 1.06 ± 0.58                   |  |  |                               |                  |
|                                                      |                                                                                                              |                                                                    |                                                                                            |                                                                          |                               | Work                          |                               |  |  |                               |                  |
| BL >30min                                            | 2.45 ± 1.75                                                                                                  |                                                                    |                                                                                            |                                                                          |                               |                               |                               |  |  |                               |                  |
| BL 6-30min                                           | 0.50 ± 0.94                                                                                                  |                                                                    |                                                                                            |                                                                          |                               |                               |                               |  |  |                               |                  |
|                                                      |                                                                                                              |                                                                    |                                                                                            |                                                                          | BL ≤5min                      | 1.40 ± 1.09                   |                               |  |  |                               |                  |
|                                                      |                                                                                                              |                                                                    |                                                                                            |                                                                          | Non-work                      |                               |                               |  |  |                               |                  |
|                                                      |                                                                                                              |                                                                    |                                                                                            |                                                                          | BL >30min                     | 5.49 ± 1.46                   |                               |  |  |                               |                  |

**Pattern measures of sedentary behavior in adults: A literature review.**

| Study                                                       | Population                                                                                                           | Sensor & settings                                                      | Data cleaning                                                                                                                                                                                                               | SB classification                        | SB pattern measure | Unit                                             | Per subject / day (mean ± SD) |  |
|-------------------------------------------------------------|----------------------------------------------------------------------------------------------------------------------|------------------------------------------------------------------------|-----------------------------------------------------------------------------------------------------------------------------------------------------------------------------------------------------------------------------|------------------------------------------|--------------------|--------------------------------------------------|-------------------------------|--|
|                                                             |                                                                                                                      |                                                                        |                                                                                                                                                                                                                             |                                          |                    | BL 6-30min                                       | 2.65 ± 1.40                   |  |
|                                                             |                                                                                                                      |                                                                        |                                                                                                                                                                                                                             |                                          |                    | BL ≤5min                                         | 2.30 ± 0.80                   |  |
| (Hallman, Mathiassen, Gupta, Korshoj, & Holtermann, 2015)   | N = 191<br>Age = 45 ± 9.5<br>Blue collar workers                                                                     | 2x Actigraph GT3X<br>Placed on the thigh and trunk (like the ActivPAL) | 4d; 24h/d<br>Waking hours<br>≥4h/day of working time and >75% of average reported working time<br>≥4h/day of leisure time and >75% of average reported leisure time<br>Non-wear (≥90 min zeros + diary)<br>Excessive values | Acti4 software classification of sitting | Wear-time          | Work (h)                                         | 8.4 ± 2.5                     |  |
|                                                             |                                                                                                                      |                                                                        |                                                                                                                                                                                                                             |                                          |                    | Leisure (h)                                      | 8.9 ± 2.7                     |  |
|                                                             |                                                                                                                      |                                                                        |                                                                                                                                                                                                                             |                                          | Total SB           | Work (h)                                         | 3.12 ± 1.5                    |  |
|                                                             |                                                                                                                      |                                                                        |                                                                                                                                                                                                                             |                                          |                    | Leisure (h)                                      | 5.93 ± 1.9                    |  |
|                                                             |                                                                                                                      |                                                                        |                                                                                                                                                                                                                             |                                          | Bouts              | % of wear-time during either Work or Leisure (%) |                               |  |
|                                                             |                                                                                                                      |                                                                        |                                                                                                                                                                                                                             |                                          |                    | Males; BL >30min                                 | 8.2 ± 10.2                    |  |
|                                                             | Females; BL >30min                                                                                                   | 5.6 ± 7.7                                                              |                                                                                                                                                                                                                             |                                          |                    |                                                  |                               |  |
|                                                             |                                                                                                                      | Non-work                                                               |                                                                                                                                                                                                                             |                                          |                    |                                                  |                               |  |
|                                                             |                                                                                                                      | Males; BL >30min                                                       | 34.8 ± 15.1                                                                                                                                                                                                                 |                                          |                    |                                                  |                               |  |
|                                                             |                                                                                                                      | Females; BL >30min                                                     | 28.2 ± 14.9                                                                                                                                                                                                                 |                                          |                    |                                                  |                               |  |
| (G. N. Healy e.a., 2008)                                    | N = 168<br>Age = 53.4 ± 11.8<br>Adults                                                                               | Actigraph 7164<br>Epoch: 1 min                                         | ≥ 5d (incl. 1 weekend day) ≥ 10h/d<br>Waking hours<br>Non-wear (≥20 min zeros + dairy)                                                                                                                                      | < 100 cpm                                | Total SB           | (hours) = sum over ≥5 days                       | 56.7 ± 12.1 *                 |  |
|                                                             |                                                                                                                      |                                                                        |                                                                                                                                                                                                                             |                                          |                    | % of wear-time (%)                               | 57                            |  |
|                                                             |                                                                                                                      |                                                                        |                                                                                                                                                                                                                             |                                          | Breaks             | Number (n) = sum over ≥5 days                    | 601 ± 155*                    |  |
|                                                             |                                                                                                                      |                                                                        |                                                                                                                                                                                                                             |                                          |                    | Intensity (cpm) = sum over ≥5 days               | 514 ± 94 *                    |  |
|                                                             |                                                                                                                      | Duration (min) = sum over ≥5 days                                      | 4.50 ± 1.05 *                                                                                                                                                                                                               |                                          |                    |                                                  |                               |  |
| (G. N. . b Healy, Matthews, Dunstan, Winkler, & Owen, 2011) | N = 4757<br>Age = 46.5 ± 14.2<br>Adults                                                                              | Actigraph 7164<br>Epoch: 1 min                                         | ≥ 10h/d<br>Non-wear (≥60 min zeros, with gap (2min <50 cpm))<br>Excessive values                                                                                                                                            | < 100 cpm                                | Wear-time          | Hours (h)                                        | 14.6 ± 1.45                   |  |
|                                                             |                                                                                                                      |                                                                        |                                                                                                                                                                                                                             |                                          | Total SB           | (hours)                                          | 8.44 ± 1.45                   |  |
|                                                             |                                                                                                                      |                                                                        |                                                                                                                                                                                                                             |                                          | Breaks             | Number (n)                                       | 92.5 ± 15.6                   |  |
| Duration (min)                                              | 4.12 ± 1.26                                                                                                          |                                                                        |                                                                                                                                                                                                                             |                                          |                    |                                                  |                               |  |
| (Helgadóttir, Forsell, & Ekblom, 2015)                      | N = 165<br>Age = 43.42 ± 11.42<br>Groups:<br>- Depressive disorders<br>- Concurrent disorders<br>- Anxiety disorders | ActiGraph GT3X+<br>On the right hip<br>Epoch = 1 min                   | ≥4d; waking hours<br>≥10h/d<br>Non-wear (≥60 min zeros, with gap (2min))<br>If excessive values, whole day excluded from analysis.                                                                                          | <100cpm                                  | Wear-time          | Hours(h)                                         | 14.14                         |  |
|                                                             |                                                                                                                      |                                                                        |                                                                                                                                                                                                                             |                                          | Total SB           | Hours(h)                                         |                               |  |
|                                                             |                                                                                                                      |                                                                        |                                                                                                                                                                                                                             |                                          |                    | All subjects                                     | 9.11 ± 1.62                   |  |
|                                                             |                                                                                                                      |                                                                        |                                                                                                                                                                                                                             |                                          |                    | Depressive disorders                             | 9.66 ± 1.62                   |  |
|                                                             |                                                                                                                      |                                                                        |                                                                                                                                                                                                                             |                                          |                    | Concurrent disorders                             | 9.02 ± 1.59                   |  |
|                                                             |                                                                                                                      |                                                                        |                                                                                                                                                                                                                             |                                          |                    | Anxiety disorder                                 | 9.20 ± 1.77                   |  |
|                                                             |                                                                                                                      |                                                                        |                                                                                                                                                                                                                             |                                          |                    | Men                                              | 9.43 ± 1.70                   |  |
|                                                             |                                                                                                                      |                                                                        |                                                                                                                                                                                                                             |                                          |                    | Women                                            | 8.95 ± 1.56                   |  |
| Bouts                                                       | Total time of BL ≥ 20min (h)                                                                                         |                                                                        |                                                                                                                                                                                                                             |                                          |                    |                                                  |                               |  |

Pattern measures of sedentary behavior in adults: A literature review.

| Study                 | Population                                     | Sensor & settings                                                     | Data cleaning                                                                                              | SB classification | SB pattern measure | Unit                              | Per subject / day (mean ± SD) |
|-----------------------|------------------------------------------------|-----------------------------------------------------------------------|------------------------------------------------------------------------------------------------------------|-------------------|--------------------|-----------------------------------|-------------------------------|
|                       |                                                |                                                                       |                                                                                                            |                   |                    | All subjects                      | 3.84 ± 1.8                    |
|                       |                                                |                                                                       |                                                                                                            |                   |                    | Depressive disorders              | 4.19 ± 1.8                    |
|                       |                                                |                                                                       |                                                                                                            |                   |                    | Concurrent disorders              | 3.77 ± 1.7                    |
|                       |                                                |                                                                       |                                                                                                            |                   |                    | Anxiety disorder                  | 4.00 ± 2.2                    |
|                       |                                                |                                                                       |                                                                                                            |                   |                    | Men                               | 4.37 ± 1.8                    |
|                       |                                                |                                                                       |                                                                                                            |                   |                    | Women                             | 3.59 ± 1.8                    |
|                       |                                                |                                                                       |                                                                                                            |                   |                    | Number of bouts of BL ≥ 20min (n) |                               |
|                       |                                                |                                                                       |                                                                                                            |                   |                    | All subjects                      | 6.41 ± 2.53                   |
|                       |                                                |                                                                       |                                                                                                            |                   |                    | Depressive disorders              | 7.03 ± 2.73                   |
|                       |                                                |                                                                       |                                                                                                            |                   |                    | Concurrent disorders              | 6.26 ± 2.34                   |
|                       |                                                |                                                                       |                                                                                                            |                   |                    | Anxiety disorder                  | 6.76 ± 3.29                   |
|                       |                                                |                                                                       |                                                                                                            |                   |                    | Men                               | 7.13 ± 2.39                   |
|                       |                                                |                                                                       |                                                                                                            |                   |                    | Women                             | 6.06 ± 2.53                   |
| (Jefferis e.a., 2015) | N = 1403<br>Age = 78.4 ± 4.6<br><br>Older men. | ActiGraph GT3X<br>Only vertical axis<br>Over the hip<br>Epoch = 1 min | ≥3d; waking hours<br>≥10h/d<br>Non-wear (≥90 min zeros;<br>with gap (2min if ≥30 min<br>before and after)) | <100cpm           | Total SB           | Hours (h (95% CI))                |                               |
|                       |                                                |                                                                       |                                                                                                            |                   |                    | All subjects                      | 10.3 (10.2-10.4)              |
|                       |                                                |                                                                       |                                                                                                            |                   |                    | Age: 70 – 74                      | 10.0 ( 9.9-10.2)              |
|                       |                                                |                                                                       |                                                                                                            |                   |                    | Age: 75 – 79                      | 10.2 (10.1-10.3)              |
|                       |                                                |                                                                       |                                                                                                            |                   |                    | Age: ≥80                          | 10.7 (10.6-10.8)              |
|                       |                                                |                                                                       |                                                                                                            |                   |                    | BMI: <25                          | 10.2 (10.1-10.4)              |
|                       |                                                |                                                                       |                                                                                                            |                   |                    | BMI: 25 – 29                      | 10.2 (10.1-10.3)              |
|                       |                                                |                                                                       |                                                                                                            |                   |                    | BMI: ≥30                          | 10.6 (10.5-10.7)              |
|                       |                                                |                                                                       |                                                                                                            |                   |                    | Smoking: yes                      | 10.3 (10.2-10.3)              |
|                       |                                                |                                                                       |                                                                                                            |                   |                    | Smoking: no                       | 10.8 (10.5-11.2)              |
|                       |                                                |                                                                       |                                                                                                            |                   |                    | Depression: no                    | 10.2 (10.2-10.3)              |
|                       |                                                |                                                                       |                                                                                                            |                   |                    | Depression: yes                   | 10.6 (10.4-10.7)              |
|                       |                                                |                                                                       |                                                                                                            |                   |                    | Chronic conditions: non           | 10.4 (10.3-10.5)              |
|                       |                                                |                                                                       |                                                                                                            |                   |                    | Chronic conditions: 1 – 2         | 10.5 (10.3-10.7)              |
|                       |                                                |                                                                       |                                                                                                            |                   |                    | Chronic conditions: ≥3            | 10.9 (10.6-11.1)              |
|                       |                                                |                                                                       |                                                                                                            |                   |                    | % of wear time (% (95% CI))       |                               |
|                       |                                                |                                                                       |                                                                                                            |                   |                    | All subjects                      | 72.4 (72.0-72.8)              |
|                       |                                                |                                                                       |                                                                                                            |                   |                    | Age: 70 – 74                      | 69.7 (68.9-70.5)              |
|                       |                                                |                                                                       |                                                                                                            |                   |                    | Age: 75 – 79                      | 71.2 (70.5-72.0)              |
|                       |                                                |                                                                       |                                                                                                            |                   |                    | Age: ≥80                          | 76.0 (75.3-76.7)              |
|                       |                                                |                                                                       |                                                                                                            |                   |                    | BMI: <25                          | 74.5 (70.6-72.3)              |
|                       |                                                |                                                                       |                                                                                                            |                   |                    | BMI: 25 – 29                      | 74.7 (71.1-72.3)              |
|                       |                                                |                                                                       |                                                                                                            |                   |                    | BMI: ≥30                          | 75.7 (74.8-76.5)              |

Pattern measures of sedentary behavior in adults: A literature review.

| Study | Population | Sensor & settings | Data cleaning | SB classification | SB pattern measure | Unit                      | Per subject / day (mean ± SD) |
|-------|------------|-------------------|---------------|-------------------|--------------------|---------------------------|-------------------------------|
|       |            |                   |               |                   |                    | Smoking: yes              | 72.3 (71.9-72.7)              |
|       |            |                   |               |                   |                    | Smoking: no               | 74.9 (72.4-77.4)              |
|       |            |                   |               |                   |                    | Depression: no            | 71.3 (70.8-71.8)              |
|       |            |                   |               |                   |                    | Depression: yes           | 76.4 (75.4-77.3)              |
|       |            |                   |               |                   |                    | Chronic conditions: non   | 73.0 (72.3-73.7)              |
|       |            |                   |               |                   |                    | Chronic conditions: 1 – 2 | 74.4 (73.1-75.6)              |
|       |            |                   |               |                   |                    | Chronic conditions: ≥3    | 78.3 (76.5-80.1)              |
|       |            |                   |               |                   | Bouts              | Number (n (95% CI))       |                               |
|       |            |                   |               |                   |                    | All subjects              | 71.9 (71.2-72.6)              |
|       |            |                   |               |                   |                    | Age: 70 – 74              | 73.4 (72.2-74.6)              |
|       |            |                   |               |                   |                    | Age: 75 – 79              | 72.7 (71.6-73.8)              |
|       |            |                   |               |                   |                    | Age: ≥80                  | 69.6 (68.3-70.9)              |
|       |            |                   |               |                   |                    | BMI: <25                  | 74.5 (73.2-75.8)              |
|       |            |                   |               |                   |                    | BMI: 25 – 29              | 72.7 (71.7-73.7)              |
|       |            |                   |               |                   |                    | BMI: ≥30                  | 65.7 (64.1-67.3)              |
|       |            |                   |               |                   |                    | Smoking: yes              | 71.7 (71.0-72.4)              |
|       |            |                   |               |                   |                    | Smoking: no               | 77.6 (73.3-82.0)              |
|       |            |                   |               |                   |                    | Depression: no            | 73.1 (72.3-73.9)              |
|       |            |                   |               |                   |                    | Depression: yes           | 67.4 (65.8-68.9)              |
|       |            |                   |               |                   |                    | Chronic conditions: non   | 71.3 (70.1-72.5)              |
|       |            |                   |               |                   |                    | Chronic conditions: 1 – 2 | 69.4 (67.4-71.4)              |
|       |            |                   |               |                   |                    | Chronic conditions: ≥3    | 66.6 (63.3-70.0)              |
|       |            |                   |               |                   |                    | Number (n)                |                               |
|       |            |                   |               |                   |                    | All subjects              |                               |
|       |            |                   |               |                   |                    | BL: >1 min                | 71.6 ± 15.7                   |
|       |            |                   |               |                   |                    | BL: ≥5 min                | 27.5 ± 4.6                    |
|       |            |                   |               |                   |                    | BL: ≥10 min               | 16.5 ± 2.7                    |
|       |            |                   |               |                   |                    | BL: ≥20 min               | 8.5 ± 1.9                     |
|       |            |                   |               |                   |                    | BL: ≥30 min               | 5.1 ± 1.6                     |
|       |            |                   |               |                   |                    | BL: ≥40 min               | 3.3 ± 1.3                     |
|       |            |                   |               |                   |                    | BL: ≥50 min               | 2.1 ± 1.1                     |
|       |            |                   |               |                   |                    | BL: ≥60 min               | 1.4 ± 0.9                     |
|       |            |                   |               |                   |                    | BL: ≥70 min               | 0.9 ± 0.7                     |
|       |            |                   |               |                   |                    | BL: ≥80 min               | 0.6 ± 0.6                     |
|       |            |                   |               |                   |                    | BL: ≥90 min               | 0.4 ± 0.4                     |
|       |            |                   |               |                   |                    | BL: ≥100 min              | 0.3 ± 0.4                     |



Pattern measures of sedentary behavior in adults: A literature review.

| Study | Population | Sensor & settings | Data cleaning | SB classification | SB pattern measure | Unit                                 | Per subject / day (mean ± SD) |
|-------|------------|-------------------|---------------|-------------------|--------------------|--------------------------------------|-------------------------------|
|       |            |                   |               |                   |                    | BL: ≥110 min                         | 0.2 ± 0.3                     |
|       |            |                   |               |                   |                    | BL: ≥120 min                         | 0.1 ± 0.2                     |
|       |            |                   |               |                   |                    | % of Total SB (%)                    |                               |
|       |            |                   |               |                   |                    | All subjects                         |                               |
|       |            |                   |               |                   |                    | BL: >1 min                           | 100                           |
|       |            |                   |               |                   |                    | BL: ≥5 min                           | 86.5 ± 5.0                    |
|       |            |                   |               |                   |                    | BL: ≥10 min                          | 74.5 ± 8.4                    |
|       |            |                   |               |                   |                    | BL: ≥20 min                          | 56.5 ± 11.8                   |
|       |            |                   |               |                   |                    | BL: ≥30 min                          | 43.2 ± 13.2                   |
|       |            |                   |               |                   |                    | BL: ≥40 min                          | 33.1 13.2                     |
|       |            |                   |               |                   |                    | BL: ≥50 min                          | 25.1 12.7                     |
|       |            |                   |               |                   |                    | BL: ≥60 min                          | 18.8 ± 11.7                   |
|       |            |                   |               |                   |                    | BL: ≥70 min                          | 14.1 ± 10.7                   |
|       |            |                   |               |                   |                    | BL: ≥80 min                          | 10.5 ± 9.6                    |
|       |            |                   |               |                   |                    | BL: ≥90 min                          | 7.7 ± 8.5                     |
|       |            |                   |               |                   |                    | BL: ≥100 min                         | 5.8 7.5                       |
|       |            |                   |               |                   |                    | BL: ≥110 min                         | 4.4 ± 6.6                     |
|       |            |                   |               |                   |                    | BL: ≥120 min                         | 3.3 ± 6.1                     |
|       |            |                   |               |                   |                    | BL (min; median (IQR))               | 3.2 (1.1-9.9)                 |
|       |            |                   |               |                   | Breaks             | Number/sedentary hour (n/SH (95% CI) |                               |
|       |            |                   |               |                   |                    | All subjects                         | 7.2 (7.1-7.3)                 |
|       |            |                   |               |                   |                    | Age: 70 – 74                         | 7.6 (7.4-7.8)                 |
|       |            |                   |               |                   |                    | Age: 75 – 79                         | 7.4 (7.2-7.6)                 |
|       |            |                   |               |                   |                    | Age: ≥80                             | 6.7 (6.5-6.9)                 |
|       |            |                   |               |                   |                    | BMI: <25                             | 7.5 (7.3-7.7)                 |
|       |            |                   |               |                   |                    | BMI: 25 – 29                         | 7.4 (7.2-7.5)                 |
|       |            |                   |               |                   |                    | BMI: ≥30                             | 6.4 (6.2-6.6)                 |
|       |            |                   |               |                   |                    | Smoking: yes                         | 7.2 (7.1-7.3)                 |
|       |            |                   |               |                   |                    | Smoking: no                          | 7.5 (6.9-8.2)                 |
|       |            |                   |               |                   |                    | Depression: no                       | 7.4 (7.3-7.5)                 |
|       |            |                   |               |                   |                    | Depression: yes                      | 6.6 (6.4-6.8)                 |
|       |            |                   |               |                   |                    | Chronic conditions: non              | 7.1 (6.9-7.3)                 |
|       |            |                   |               |                   |                    | Chronic conditions: 1 – 2            | 6.9 (6.6-7.2)                 |
|       |            |                   |               |                   |                    | Chronic conditions: ≥3               | 6.3 (5.9-6.8)                 |

**Pattern measures of sedentary behavior in adults: A literature review.**

| Study                             | Population                                     | Sensor & settings                                                                  | Data cleaning                                                                                        | SB classification | SB pattern measure | Unit              | Per subject / day (mean ± SD) |
|-----------------------------------|------------------------------------------------|------------------------------------------------------------------------------------|------------------------------------------------------------------------------------------------------|-------------------|--------------------|-------------------|-------------------------------|
| (Jefferis e.a., 2016)             | N = 1078<br>Age = 78.5 ± 4.7<br><br>Older men. | ActiGraph GT3X<br>Only vertical axis<br>On a belt, over right hip<br>Epoch = 1 min | ≥3d; waking hours<br>≥10h/d<br>Non-wear (≥90 min zeros; with gap (2min if ≥30 min before and after)) | <100cpm           | Wear-time          | Hours(h)          | 14.27 ± 1.12                  |
|                                   |                                                |                                                                                    |                                                                                                      |                   | Total SB           | Hours (h)         | 10.20 ± 1.38                  |
|                                   |                                                |                                                                                    |                                                                                                      |                   | Bouts              | % of Total SB (%) |                               |
|                                   |                                                |                                                                                    |                                                                                                      |                   |                    | BL: 01-15min      | 37                            |
|                                   |                                                |                                                                                    |                                                                                                      |                   |                    | BL: 16-30min      | 21                            |
|                                   |                                                |                                                                                    |                                                                                                      |                   |                    | BL: 31-60min      | 24                            |
|                                   |                                                |                                                                                    |                                                                                                      |                   |                    | BL: ≥61min        | 18                            |
| (Judice, Silva, & Sardinha, 2015) | N = 351<br>Age = 74.6 ± 7.0                    | ActiGraph GT1M<br>Right hip, near the iliac crest<br>Epoch = 1 min                 | ≥3d (incl. 1 weekend day) waking hours<br>≥10h/d<br>Non-wear (≥60 min zeros + water activities)      | <100 cpm          | Wear-time          | Hours (h)         |                               |
|                                   |                                                |                                                                                    |                                                                                                      |                   |                    | All subjects      | 13.3                          |
|                                   |                                                |                                                                                    |                                                                                                      |                   |                    | Male              | 13.46                         |
|                                   |                                                |                                                                                    |                                                                                                      |                   |                    | Female            | 13.23                         |
|                                   |                                                |                                                                                    |                                                                                                      |                   | Total SB           | Hours (h)         |                               |
|                                   |                                                |                                                                                    |                                                                                                      |                   |                    | All subjects      | 9.60 ± 1.95                   |
|                                   |                                                |                                                                                    |                                                                                                      |                   |                    | Male              | 9.87 ± 1.80                   |
|                                   |                                                |                                                                                    |                                                                                                      |                   |                    | Female            | 9.46 ± 2.02                   |
|                                   |                                                |                                                                                    |                                                                                                      |                   | Bouts              | Number(n)         |                               |
|                                   |                                                |                                                                                    |                                                                                                      |                   |                    | All subjects      |                               |
|                                   |                                                |                                                                                    |                                                                                                      |                   |                    | BL: 5-10min       | 156.0 ± 27.0                  |
|                                   |                                                |                                                                                    |                                                                                                      |                   |                    | BL: 11-20min      | 40.0 ± 14.0                   |
|                                   |                                                |                                                                                    |                                                                                                      |                   |                    | BL: 21-30min      | 16.0 ± 7.5                    |
|                                   |                                                |                                                                                    |                                                                                                      |                   |                    | BL: 31-60min      | 6.0 ± 3.9                     |
|                                   |                                                |                                                                                    |                                                                                                      |                   |                    | BL: >60min        | 1.3 ± 1.2                     |
|                                   |                                                |                                                                                    |                                                                                                      |                   |                    | Male              |                               |
|                                   |                                                |                                                                                    |                                                                                                      |                   |                    | BL: 5-10min       | 156.5 ± 23.8                  |
|                                   | BL: 11-20min                                   | 44.0 ± 13.7                                                                        |                                                                                                      |                   |                    |                   |                               |
|                                   | BL: 21-30min                                   | 18.1 ± 7.0                                                                         |                                                                                                      |                   |                    |                   |                               |
|                                   | BL: 31-60min                                   | 7.0 ± 3.8                                                                          |                                                                                                      |                   |                    |                   |                               |
|                                   | BL: >60min                                     | 1.6 ± 1.2                                                                          |                                                                                                      |                   |                    |                   |                               |
|                                   | Female                                         |                                                                                    |                                                                                                      |                   |                    |                   |                               |
|                                   | BL: 5-10min                                    | 156.2 ± 28.7                                                                       |                                                                                                      |                   |                    |                   |                               |
|                                   | BL: 11-20min                                   | 38.2 ± 14.6                                                                        |                                                                                                      |                   |                    |                   |                               |
|                                   | BL: 21-30min                                   | 14.8 ± 7.5                                                                         |                                                                                                      |                   |                    |                   |                               |
|                                   | BL: 31-60min                                   | 5.4 ± 3.8                                                                          |                                                                                                      |                   |                    |                   |                               |
|                                   | BL: >60min                                     | 1.2 ± 1.2                                                                          |                                                                                                      |                   |                    |                   |                               |

**Pattern measures of sedentary behavior in adults: A literature review.**

| Study                                               | Population                                                                                                                              | Sensor & settings                                                                                                                                                                                                                                            | Data cleaning                             | SB classification                                                                                                                                         | SB pattern measure        | Unit               | Per subject / day (mean ± SD) |
|-----------------------------------------------------|-----------------------------------------------------------------------------------------------------------------------------------------|--------------------------------------------------------------------------------------------------------------------------------------------------------------------------------------------------------------------------------------------------------------|-------------------------------------------|-----------------------------------------------------------------------------------------------------------------------------------------------------------|---------------------------|--------------------|-------------------------------|
| (Júdice, Santos, Hamilton, Sardinha, & Silva, 2015) | N = 7<br>Age = 49.7 ± 12.6<br><br>Overweight/Obese adult with computer based work.<br><br>Crossover-RCT:<br>- Control<br>- Intervention | ActivPAL<br>On right thigh.<br>Epoch = 1min<br><br>ActiGraph GT3X<br>On the right hip, near iliac crest.<br>Only vertical axis<br>Filter: AG-norm<br>Epoch = 1min<br><br>Actiheart (HR+Acc.)<br>On an adapted polarband placed on the chest.<br>Epoch = 1min | 1w+1w; waking hours<br>≥10h/day wear-time | ActivPAL:<br>S+R<br><br>Actigraph:<br><100 cpm<br><br>Actiheart:<br><1.5METs                                                                              | Total SB                  | Hours(h)           |                               |
|                                                     |                                                                                                                                         |                                                                                                                                                                                                                                                              |                                           |                                                                                                                                                           |                           | Control            |                               |
|                                                     |                                                                                                                                         |                                                                                                                                                                                                                                                              |                                           |                                                                                                                                                           |                           | ActivPAL           | 8.58 ± 2.4                    |
|                                                     |                                                                                                                                         |                                                                                                                                                                                                                                                              |                                           |                                                                                                                                                           |                           | ActiGraph GT3x     | 10.7 ± 1.6                    |
|                                                     |                                                                                                                                         |                                                                                                                                                                                                                                                              |                                           |                                                                                                                                                           |                           | Actiheart          | 5.93 ± 2.1                    |
|                                                     |                                                                                                                                         |                                                                                                                                                                                                                                                              |                                           |                                                                                                                                                           |                           | Intervention       |                               |
|                                                     |                                                                                                                                         |                                                                                                                                                                                                                                                              |                                           |                                                                                                                                                           |                           | ActivPAL           | 5.27 ± 2.9                    |
|                                                     |                                                                                                                                         |                                                                                                                                                                                                                                                              |                                           |                                                                                                                                                           |                           | ActiGraph GT3x     | 10.6 ± 2.3                    |
|                                                     |                                                                                                                                         |                                                                                                                                                                                                                                                              |                                           |                                                                                                                                                           |                           | Actiheart          | 5.7 ± 2.6                     |
|                                                     |                                                                                                                                         |                                                                                                                                                                                                                                                              |                                           |                                                                                                                                                           |                           | Breaks             | Number (n)                    |
| Control                                             |                                                                                                                                         |                                                                                                                                                                                                                                                              |                                           |                                                                                                                                                           |                           |                    |                               |
| ActivPAL                                            | 46.6 ± 16.7                                                                                                                             |                                                                                                                                                                                                                                                              |                                           |                                                                                                                                                           |                           |                    |                               |
| ActiGraph GT3x                                      | 128.0 ± 43.6                                                                                                                            |                                                                                                                                                                                                                                                              |                                           |                                                                                                                                                           |                           |                    |                               |
| Actiheart                                           | 258 ± 79.8                                                                                                                              |                                                                                                                                                                                                                                                              |                                           |                                                                                                                                                           |                           |                    |                               |
| Intervention                                        |                                                                                                                                         |                                                                                                                                                                                                                                                              |                                           |                                                                                                                                                           |                           |                    |                               |
| ActivPAL                                            | 53.7 ± 15.2                                                                                                                             |                                                                                                                                                                                                                                                              |                                           |                                                                                                                                                           |                           |                    |                               |
| ActiGraph GT3x                                      | 136 ± 34.5                                                                                                                              |                                                                                                                                                                                                                                                              |                                           |                                                                                                                                                           |                           |                    |                               |
| Actiheart                                           | 305 ± 79.2                                                                                                                              |                                                                                                                                                                                                                                                              |                                           |                                                                                                                                                           |                           |                    |                               |
| (Kim, Barry, & Kang, 2015)                          | N = 11<br>Age = 30.67 ± 7.24                                                                                                            | ActivPAL<br>Mid-anterior position on right thigh<br><br>ActiGraph GT3X<br>On waist over right hip<br>Epoch = 1s – 1 min                                                                                                                                      | Non-wear based on images (lifelogging)    | ActivPAL:<br>S+R<br><br>Actigraph:<br><50 cpm<br><100 cpm<br><150 cpm<br>Sojourn (vertical axis)<br>Sojourn (three axis)<br>Inclinometer on 1s, 10s, 60s. | Wear-time<br><br>Total SB | Hours(h)           | 6.11 ± 0.36                   |
|                                                     |                                                                                                                                         |                                                                                                                                                                                                                                                              |                                           |                                                                                                                                                           |                           | Hours(h (95% CI))) |                               |
|                                                     |                                                                                                                                         |                                                                                                                                                                                                                                                              |                                           |                                                                                                                                                           |                           | ActivPAL           | 3.95 (2.90, 4.99)             |
|                                                     |                                                                                                                                         |                                                                                                                                                                                                                                                              |                                           |                                                                                                                                                           |                           | GT3X-Soj1x         | 3.75 (2.81, 4.69)             |
|                                                     |                                                                                                                                         |                                                                                                                                                                                                                                                              |                                           |                                                                                                                                                           |                           | GT3X-Soj3x         | 3.94 (2.88, 4.99)             |
|                                                     |                                                                                                                                         |                                                                                                                                                                                                                                                              |                                           |                                                                                                                                                           |                           | GT3X-Incli-1s      | 3.19 (2.31, 4.07)             |
|                                                     |                                                                                                                                         |                                                                                                                                                                                                                                                              |                                           |                                                                                                                                                           |                           | GT3X-<8cnts/10s    | 4.38 (3.63, 5.13)             |
|                                                     |                                                                                                                                         |                                                                                                                                                                                                                                                              |                                           |                                                                                                                                                           |                           | GT3X-Incli-10s     | 3.17 (2.30, 4.05)             |
|                                                     |                                                                                                                                         |                                                                                                                                                                                                                                                              |                                           |                                                                                                                                                           |                           | GT3X-<50cpm        | 3.89 (3.04, 4.74)             |
|                                                     |                                                                                                                                         |                                                                                                                                                                                                                                                              |                                           |                                                                                                                                                           |                           | GT3X-<100cpm       | 4.24 (3.46, 5.03)             |
|                                                     |                                                                                                                                         |                                                                                                                                                                                                                                                              |                                           |                                                                                                                                                           |                           | GT3X-<150cpm       | 4.42 (3.65, 5.18)             |
|                                                     |                                                                                                                                         |                                                                                                                                                                                                                                                              |                                           |                                                                                                                                                           |                           | GT3X-Incli-60s     | 3.16 (2.26, 4.05)             |
|                                                     |                                                                                                                                         |                                                                                                                                                                                                                                                              |                                           |                                                                                                                                                           |                           | Bouts              | Number(n (95% CI)))           |
|                                                     |                                                                                                                                         |                                                                                                                                                                                                                                                              |                                           |                                                                                                                                                           |                           | ActivPAL           | 18.2 (12.7, 23.6)             |
|                                                     |                                                                                                                                         |                                                                                                                                                                                                                                                              |                                           |                                                                                                                                                           |                           | GT3X-Soj1x         | 23.8 (18.9, 28.8)             |
|                                                     |                                                                                                                                         |                                                                                                                                                                                                                                                              |                                           |                                                                                                                                                           |                           | GT3X-Soj3x         | 13.7 (10.2, 17.2)             |
|                                                     |                                                                                                                                         |                                                                                                                                                                                                                                                              |                                           |                                                                                                                                                           |                           | GT3X-Incli-1s      | 55.1 (35.6, 74.6)             |

Pattern measures of sedentary behavior in adults: A literature review.

| Study                            | Population | Sensor & settings                            | Data cleaning                                                                              | SB classification                                                           | SB pattern measure | Unit                                                                                                                                                 | Per subject / day (mean ± SD)                                                                                                       |
|----------------------------------|------------|----------------------------------------------|--------------------------------------------------------------------------------------------|-----------------------------------------------------------------------------|--------------------|------------------------------------------------------------------------------------------------------------------------------------------------------|-------------------------------------------------------------------------------------------------------------------------------------|
|                                  |            |                                              |                                                                                            |                                                                             |                    | GT3X-<8cnts/10s                                                                                                                                      | 137.0 (109.1, 164.9)                                                                                                                |
|                                  |            |                                              |                                                                                            |                                                                             |                    | GT3X-Incli-10s                                                                                                                                       | 53.0 (34.5, 71.7)                                                                                                                   |
|                                  |            |                                              |                                                                                            |                                                                             |                    | GT3X-<50cpm                                                                                                                                          | 32.0 (24.8, 39.2)                                                                                                                   |
|                                  |            |                                              |                                                                                            |                                                                             |                    | GT3X-<100cpm                                                                                                                                         | 27.8 (22.1, 33.5)                                                                                                                   |
|                                  |            |                                              |                                                                                            |                                                                             |                    | GT3X-<150cpm                                                                                                                                         | 24.9 (19.0, 30.8)                                                                                                                   |
|                                  |            |                                              |                                                                                            |                                                                             |                    | GT3X-Incli-60s                                                                                                                                       | 22.5 (14.9, 30.0)                                                                                                                   |
|                                  |            |                                              |                                                                                            |                                                                             |                    | BL (min (95% CI))                                                                                                                                    |                                                                                                                                     |
|                                  |            |                                              |                                                                                            |                                                                             |                    | ActivPAL                                                                                                                                             | 16.7 (8.9, 22.4)                                                                                                                    |
|                                  |            |                                              |                                                                                            |                                                                             |                    | GT3X-Soj1x                                                                                                                                           | 10.1 (6.6, 13.5)                                                                                                                    |
|                                  |            |                                              |                                                                                            |                                                                             |                    | GT3X-Soj3x                                                                                                                                           | 18.7 (12.7, 24.6)                                                                                                                   |
|                                  |            |                                              |                                                                                            |                                                                             |                    | GT3X-Incli-1s                                                                                                                                        | 4.3 (2.8, 5.8)                                                                                                                      |
|                                  |            |                                              |                                                                                            |                                                                             |                    | GT3X-<8cnts/10s                                                                                                                                      | 2.2 (1.4, 2.9)                                                                                                                      |
|                                  |            |                                              |                                                                                            |                                                                             |                    | GT3X-Incli-10s                                                                                                                                       | 4.4 (2.9, 5.9)                                                                                                                      |
|                                  |            |                                              |                                                                                            |                                                                             |                    | GT3X-<50cpm                                                                                                                                          | 8.5 (5.0, 12.1)                                                                                                                     |
|                                  |            |                                              |                                                                                            |                                                                             |                    | GT3X-<100cpm                                                                                                                                         | 10.4 (6.5, 14.4)                                                                                                                    |
|                                  |            |                                              |                                                                                            |                                                                             |                    | GT3X-<150cpm                                                                                                                                         | 12.5 (7.4, 17.6)                                                                                                                    |
|                                  |            |                                              |                                                                                            |                                                                             |                    | GT3X-Incli-60s                                                                                                                                       | 9.8 (7.0, 12.5)                                                                                                                     |
| (Kim, Welk, Braun, & Kang, 2015) | N = 5917   | ActiGraph 7164<br>Right hip<br>Epoch = 1 min | ≥4d; Waking hours<br>≥10h/d wear time<br>Non-wear (≥60 min zeros, with gap (2min <100cpm)) | <100 cpm<br><i>All estimates were adjusted for accelerometer wear time.</i> | Total SB           | Hours(h (SE))<br>Total<br>BL: 1 min<br>BL: 2-4 min<br>BL: 5-9 min<br>BL: 10-14 min<br>BL: 15-19 min<br>BL: 20-24 min<br>BL: 25-29 min<br>BL: ≥30 min | 8.05 (0.03)<br>0.57 (0.00)<br>1.42 (0.01)<br>1.57 (0.01)<br>1.04 (0.01)<br>0.74 (0.00)<br>0.56 (0.00)<br>0.43 (0.00)<br>1.73 (0.02) |
|                                  |            |                                              |                                                                                            |                                                                             | Bouts              | Number(n (SE))<br>All<br>BL: 1 min<br>BL: 2-4 min<br>BL: 5-9 min<br>BL: 10-14 min<br>BL: 15-19 min<br>BL: 20-24 min<br>BL: 25-29 min                 | 93.02 (0.31)<br>34.25 (0.17)<br>31.53 (0.16)<br>14.41 (0.05)<br>5.34 (0.03)<br>2.65 (0.02)<br>1.53 (0.01)<br>0.96 (0.01)            |

**Pattern measures of sedentary behavior in adults: A literature review.**

| Study                                           | Population                                                                  | Sensor & settings                                | Data cleaning     | SB classification   | SB pattern measure           | Unit                                                            | Per subject / day (mean ± SD)                                               |          |           |          |             |
|-------------------------------------------------|-----------------------------------------------------------------------------|--------------------------------------------------|-------------------|---------------------|------------------------------|-----------------------------------------------------------------|-----------------------------------------------------------------------------|----------|-----------|----------|-------------|
|                                                 |                                                                             |                                                  |                   |                     |                              | BL: ≥30 min                                                     | 2.35 (0.03)                                                                 |          |           |          |             |
| (Leask, Harvey, Skelton, & Chastin, 2015)       | N = 33<br>Age = 65-82<br>(median = 73.3)<br>Community dwelling older adults | ActivPAL                                         | ≥1d; waking hours | S+R                 | Total SB                     | % of wear-time (% (range))                                      | 59.2 (28.3 – 94)                                                            |          |           |          |             |
|                                                 |                                                                             |                                                  |                   |                     | Bouts                        | Number (n(range))<br>BL≥2min                                    | 30 (11 – 35)                                                                |          |           |          |             |
| (Lord e.a., 2011)                               | N=56<br>Age: 78.9 ± 4.9<br><br>Older adults                                 | ActivPAL<br>sf = 10 Hz;                          | 7d<br>24h/d       | S+L                 | Total SB                     | (hours)                                                         | 12.46 ± 1.94                                                                |          |           |          |             |
|                                                 |                                                                             |                                                  |                   |                     | Bouts                        | Gini index (G)                                                  | 0.836 ± 0.04                                                                |          |           |          |             |
|                                                 |                                                                             |                                                  |                   | S→S                 | Bouts                        | Temporal diversity (D <sub>1sed</sub> )                         | 15.2 ± 5.3                                                                  |          |           |          |             |
|                                                 |                                                                             |                                                  |                   |                     | Breaks                       | Number per day                                                  | 39.0 ± 10.7                                                                 |          |           |          |             |
| (Lyden, Keadle, Staudenmayer, & Freedson, 2014) | N = 13<br>Age: 24.8 ± 5.2                                                   | Actigraph GT3X<br>(1D and 3D)<br>Epoch: 1 second | 3d<br>10h/d       | Soj-1x model        | Total SB                     | (hours) (mean (95% CI))                                         | 6.27 (5.70, 6.85)                                                           |          |           |          |             |
|                                                 |                                                                             |                                                  |                   |                     | Breaks                       | Number (n) (mean (95% CI))<br>Breakrate (n/SH) (mean (95% CI))  | 39.3 (35.3, 43.3)<br>6.6 (5.5, 7.7)                                         |          |           |          |             |
|                                                 |                                                                             |                                                  |                   | Soj-3x model        | Total SB                     | (hours) (mean (95% CI))                                         | 5.80 (5.28, 6.33)                                                           |          |           |          |             |
|                                                 |                                                                             |                                                  |                   |                     | Breaks                       | Number (n) (mean (95% CI))<br>Breakrate (n/SH) (mean (95% CI))  | 29.4 (23.3, 35.5)<br>-1.3 (-12.7, 10.1)                                     |          |           |          |             |
|                                                 |                                                                             |                                                  |                   | ≤ 100 cpm           | Total SB                     | (hours) (mean (95% CI))                                         | 6.52 (6.06, 6.98)                                                           |          |           |          |             |
|                                                 |                                                                             |                                                  |                   |                     | Breaks                       | Number (n) (mean (95% CI))<br>Breakrate (n/SH) (mean (95% CI))  | 54.4 (51.5, 72.9)<br>11.2 (8.7, 13.8)                                       |          |           |          |             |
|                                                 |                                                                             |                                                  |                   | ≤ 50 cpm            | Total SB                     | (hours) (mean (95% CI))                                         | 5.95 (5.43, 6.46)                                                           |          |           |          |             |
|                                                 |                                                                             |                                                  |                   |                     | Breaks                       | Number (n) (mean (95% CI))<br>Breakrate (n/SH) (mean (95% CI))  | 62.2 (51.5, 72.9)<br>11.2 (8.7, 13.8)                                       |          |           |          |             |
|                                                 |                                                                             |                                                  |                   | 8 counts per 10 sec | Total SB                     | (hours) (mean (95% CI))                                         | 6.40 (5.91, 6.89)                                                           |          |           |          |             |
|                                                 |                                                                             |                                                  |                   |                     | Breaks                       | Number (n) (mean (95% CI))<br>Breakrate (n/SH) (mean (95% CI))  | 56.9 (45.3, 68.4)<br>9.5 (7.2, 11.8)                                        |          |           |          |             |
|                                                 |                                                                             |                                                  |                   | (Lynch e.a., 2016)  | N = 185<br>Age = 64.2 ± 10.3 | ActiGraph GT3X+<br>Elastic belt over right hip.<br>Epoch: 1 min | Waking hours<br>≥10h/d<br>Non-wear (≥60 min zeros, with gap (2min <50 cpm)) | <100 cpm | Wear-time | Hours(h) | 14.41       |
|                                                 |                                                                             |                                                  |                   |                     |                              |                                                                 |                                                                             |          | Total SB  | Hours(h) | 8.77 ± 1.55 |
| Bouts                                           | Number (n)<br>BL: ≥ 20 min                                                  | 6.1                                              |                   |                     |                              |                                                                 |                                                                             |          |           |          |             |

**Pattern measures of sedentary behavior in adults: A literature review.**

| Study                                                   | Population                      | Sensor & settings                                 | Data cleaning                                                                                | SB classification | SB pattern measure | Unit                    | Per subject / day (mean ± SD) |
|---------------------------------------------------------|---------------------------------|---------------------------------------------------|----------------------------------------------------------------------------------------------|-------------------|--------------------|-------------------------|-------------------------------|
|                                                         | Colon cancer survivors          |                                                   | Excessive values                                                                             |                   |                    | BL: ≥ 30 min            | 3.2                           |
|                                                         |                                 |                                                   |                                                                                              |                   |                    | % of Total SB (%)       |                               |
|                                                         |                                 |                                                   |                                                                                              |                   |                    | BL: ≥ 20 min            | 42.6 ± 1.92                   |
|                                                         |                                 |                                                   |                                                                                              |                   |                    | BL: ≥ 30 min            | 29.3 ± 1.74                   |
| (Maddocks & Wilcock, 2012)                              | N = 85<br>Age: 66 ± 9           | ActivPAL                                          | 4d (incl. Sat. and Sun.)<br>24h/d                                                            | S+L               | Total SB           | Hours (h) of 24h        |                               |
|                                                         |                                 |                                                   |                                                                                              |                   |                    | All subjects            | 17.9 ± 2.1                    |
|                                                         |                                 |                                                   |                                                                                              |                   |                    | Physical status 0       | 17.7 ± 2.2                    |
|                                                         | Patients with Thoracic cancer   |                                                   |                                                                                              |                   |                    | Physical status 1       | 19.7 ± 1.7                    |
|                                                         | Physical status 0-2             |                                                   |                                                                                              |                   |                    | Physical status 2       | 21.0 ± 1.7                    |
|                                                         |                                 |                                                   |                                                                                              | S→S               | Breaks             | Number (n)              |                               |
|                                                         |                                 |                                                   |                                                                                              |                   |                    | All subjects            | 45 ± 17                       |
|                                                         |                                 |                                                   |                                                                                              |                   |                    | Physical status 0       | 49 ± 8                        |
|                                                         |                                 |                                                   |                                                                                              |                   |                    | Physical status 1       | 47 ± 18                       |
|                                                         |                                 |                                                   |                                                                                              |                   |                    | Physical status 2       | 39 ± 19                       |
| (Manns, Ezeugwu, Armijo-Olivo, Vallance, & Healy, 2015) | N = 2017<br>Age = 70.7 ± 7.6    | ActiGraph 7164<br>Over right hip<br>Epoch = 1 min | Waking hours ≥10h/d<br>Non-wear (≥60 min zeros, with gap (2min <50 cpm))<br>Excessive values | <100 cpm          | Wear time          | Hours (h (95% CI))      |                               |
|                                                         |                                 |                                                   |                                                                                              |                   |                    | - m-disability present  | 14.37 (14.06, 14.68)          |
|                                                         |                                 |                                                   |                                                                                              |                   |                    | - m-disability absent   | 14.48 (14.21, 14.76)          |
|                                                         | Community dwelling older adults |                                                   |                                                                                              |                   | Total SB           | Hours (h (95% CI))      |                               |
|                                                         | - mobility disability present   |                                                   |                                                                                              |                   |                    | - m-disability present  | 9.92 (9.60, 10.24)            |
|                                                         | - mobility disability absent    |                                                   |                                                                                              |                   |                    | - m-disability absent   | 9.18 (8.8, 9.47)              |
|                                                         |                                 |                                                   |                                                                                              |                   | Bouts              | BL (min)                |                               |
|                                                         |                                 |                                                   |                                                                                              |                   |                    | - m-disability present  |                               |
|                                                         |                                 |                                                   |                                                                                              |                   |                    | (mean (95% CI))         | 7.3 (7.0, 7.7)                |
|                                                         |                                 |                                                   |                                                                                              |                   |                    | (median (IQR))          | 6.6 (5.2 – 8.7)               |
|                                                         |                                 |                                                   |                                                                                              |                   |                    | - m-disability absent   |                               |
|                                                         |                                 |                                                   |                                                                                              |                   |                    | (mean (95% CI))         | 6.4 (6.1, 6.8)                |
|                                                         |                                 |                                                   |                                                                                              |                   |                    | (median (IQR))          | 6.1 (5.0 – 7.6)               |
|                                                         |                                 |                                                   |                                                                                              |                   | Breaks             | Duration (min (95% CI)) |                               |
|                                                         |                                 |                                                   |                                                                                              |                   |                    | - m-disability present  |                               |
|                                                         |                                 |                                                   |                                                                                              |                   |                    | (mean (95% CI))         | 3.0 (2.8, 3.2)                |
|                                                         |                                 |                                                   |                                                                                              |                   |                    | (median (IQR))          | 3.2(2.6 – 3.8)                |
|                                                         |                                 |                                                   |                                                                                              |                   |                    | - m-disability absent   |                               |
|                                                         |                                 |                                                   |                                                                                              |                   |                    | (mean (95% CI))         | 3.7 (3.5, 3.8)                |
|                                                         |                                 |                                                   |                                                                                              |                   |                    | (median (IQR))          | 3.7 (3.1 – 4.5)               |

**Pattern measures of sedentary behavior in adults: A literature review.**

| Study                                                     | Population                                                                                        | Sensor & settings                                                             | Data cleaning                                              | SB classification | SB pattern measure                | Unit                                                       | Per subject / day (mean ± SD) |
|-----------------------------------------------------------|---------------------------------------------------------------------------------------------------|-------------------------------------------------------------------------------|------------------------------------------------------------|-------------------|-----------------------------------|------------------------------------------------------------|-------------------------------|
|                                                           |                                                                                                   |                                                                               |                                                            |                   |                                   | Number (n (95% CI))                                        |                               |
|                                                           |                                                                                                   |                                                                               |                                                            |                   |                                   | - m-disability present                                     | 87.6 (85.1, 90.1)             |
|                                                           |                                                                                                   |                                                                               |                                                            |                   |                                   | - m-disability absent                                      | 89.6 (87.3, 91.9)             |
| (Ortlieb e.a., 2014)                                      | N = 168<br>Age: 65 – 89                                                                           | Actigraph GT3X;<br>Epoch: 1 min<br>1D: vertical axis only                     | ≥4d<br>≥10h/d<br>Non-wear (≥20 min zeros, with gap (2min)) | ≤ 100 cpm         | Total SB                          | (hours)                                                    |                               |
|                                                           | Groups - total<br>PA/day:<br>1) 'rare' (<25%)<br>2) 'average' (≥25- <75%)<br>3) 'frequent' (≥75%) |                                                                               |                                                            |                   |                                   | All subjects                                               | 8.4 ± 1.48                    |
|                                                           |                                                                                                   |                                                                               |                                                            |                   |                                   | % of wear time (median (5%, 95%))                          |                               |
|                                                           |                                                                                                   |                                                                               |                                                            |                   |                                   | All                                                        | 65 (50, 82)                   |
|                                                           |                                                                                                   |                                                                               |                                                            |                   |                                   | Rare                                                       | 74 (66, 85)                   |
|                                                           |                                                                                                   |                                                                               |                                                            |                   |                                   | Average                                                    | 65 (54, 74)                   |
|                                                           |                                                                                                   |                                                                               |                                                            |                   |                                   | Frequent                                                   | 59 (41, 67)                   |
|                                                           |                                                                                                   |                                                                               |                                                            |                   | Bouts                             | BL (min) (mean (5%, 95%))                                  |                               |
|                                                           |                                                                                                   |                                                                               |                                                            |                   |                                   | All                                                        | 7.08 (4.78, 11.81)            |
|                                                           |                                                                                                   |                                                                               |                                                            |                   |                                   | Rare                                                       | 8.64 (6.13, 12.58)            |
|                                                           |                                                                                                   |                                                                               |                                                            |                   |                                   | Average                                                    | 6.91 (4.80, 9.97)             |
|                                                           |                                                                                                   |                                                                               |                                                            |                   |                                   | Frequent                                                   | 6.31 (4.18, 8.58)             |
|                                                           |                                                                                                   |                                                                               |                                                            |                   |                                   | BL (min) (median (5%, 95%))                                |                               |
|                                                           |                                                                                                   |                                                                               |                                                            |                   |                                   | All                                                        | 3.00 (2.00, 4.50)             |
|                                                           |                                                                                                   |                                                                               |                                                            |                   |                                   | Rare                                                       | 3.00 (2.00, 5.00)             |
|                                                           |                                                                                                   |                                                                               |                                                            |                   |                                   | Average                                                    | 3.00 (2.00, 4.00)             |
|                                                           |                                                                                                   |                                                                               |                                                            |                   |                                   | Frequent                                                   | 2.00 (2.00, 3.00)             |
|                                                           |                                                                                                   |                                                                               |                                                            |                   |                                   | % of total SB (%)                                          |                               |
|                                                           |                                                                                                   |                                                                               |                                                            |                   |                                   | All BL: >3 min                                             | 89 (84, 92)                   |
|                                                           |                                                                                                   |                                                                               |                                                            |                   |                                   | Rare BL: >3 min                                            | 90 (86, 92)                   |
|                                                           |                                                                                                   |                                                                               |                                                            |                   |                                   | Average BL: >3 min                                         | 88 (84, 92)                   |
|                                                           |                                                                                                   |                                                                               |                                                            |                   |                                   | Frequent BL: >2 min                                        | 88 (81, 91)                   |
|                                                           |                                                                                                   |                                                                               |                                                            |                   |                                   | Gini index (G (5%, 95%))                                   |                               |
|                                                           |                                                                                                   |                                                                               |                                                            |                   |                                   | All                                                        | 0.63 (0.57, 0.68)             |
|                                                           |                                                                                                   |                                                                               |                                                            |                   |                                   | Rare                                                       | 0.65 (0.60, 0.68)             |
|                                                           |                                                                                                   |                                                                               |                                                            |                   |                                   | Average                                                    | 0.63 (0.58, 0.68)             |
|                                                           |                                                                                                   |                                                                               |                                                            |                   |                                   | Frequent                                                   | 0.62 (0.57, 0.67)             |
| (Paraschiv-Ionescu, Buchser, Rutschmann, & Aminian, 2008) | N=30<br>Groups:<br>1) Healthy subjects                                                            | Three inertial sensors (each with two accelerometers and one gyroscope) fixed | 5d<br>8h/d<br>No epoch length reported.                    | S+L               | Sequence of activity-rest periods | Detrended Fluctuation Analysis (DFA) scaling component (α) |                               |
|                                                           |                                                                                                   |                                                                               |                                                            |                   |                                   | Healthy subjects                                           | 0.856±0.09                    |
|                                                           |                                                                                                   |                                                                               |                                                            |                   |                                   | Chronic Pain patients                                      | 0.756±0.09                    |

**Pattern measures of sedentary behavior in adults: A literature review.**

| Study                                                     | Population                                                                                | Sensor & settings                                      | Data cleaning | SB classification | SB pattern measure | Unit                                                             | Per subject / day (mean ± SD) |
|-----------------------------------------------------------|-------------------------------------------------------------------------------------------|--------------------------------------------------------|---------------|-------------------|--------------------|------------------------------------------------------------------|-------------------------------|
|                                                           | 2) Chronic Pain patients (CP)                                                             | <i>on the chest, the thigh and the shank.</i><br>40 Hz |               |                   |                    | Fano factor scaling component ( $\alpha_F$ )                     |                               |
|                                                           |                                                                                           |                                                        |               |                   |                    | Healthy subjects                                                 | 0.350±0.085                   |
|                                                           |                                                                                           |                                                        |               |                   |                    | Chronic Pain patients                                            | 0.178±0.100                   |
|                                                           |                                                                                           |                                                        |               |                   |                    | Probability of words representing:<br>long activity - short rest |                               |
|                                                           |                                                                                           |                                                        |               |                   |                    | P <sub>111</sub> (word: "111")                                   |                               |
|                                                           |                                                                                           |                                                        |               |                   |                    | Healthy subjects                                                 | 0.060±0.02                    |
|                                                           |                                                                                           |                                                        |               |                   |                    | Chronic Pain patients                                            | 0.043±0.01                    |
|                                                           |                                                                                           |                                                        |               |                   |                    | P <sub>110</sub> (word: "110")                                   |                               |
|                                                           |                                                                                           |                                                        |               |                   |                    | Healthy subjects                                                 | 0.063±0.01                    |
|                                                           |                                                                                           |                                                        |               |                   |                    | Chronic Pain patients                                            | 0.052±0.01                    |
|                                                           |                                                                                           |                                                        |               |                   |                    | P <sub>011</sub> (word: "011")                                   |                               |
|                                                           |                                                                                           |                                                        |               |                   |                    | Healthy subjects                                                 | 0.065±0.01                    |
|                                                           |                                                                                           |                                                        |               |                   |                    | Chronic Pain patients                                            | 0.053±0.01                    |
|                                                           |                                                                                           |                                                        |               |                   |                    | P <sub>111111</sub> (word: "111", "111")                         |                               |
|                                                           |                                                                                           |                                                        |               |                   |                    | Healthy subjects                                                 | 0.540±0.08                    |
|                                                           |                                                                                           |                                                        |               |                   |                    | Chronic Pain patients                                            | 0.400±0.06                    |
| (Paraschiv-Ionescu, Perruchoud, Buchser, & Aminian, 2009) | N = 32<br>Age: 67 ± 13<br>Groups:<br>1) Healthy subjects<br>2) Chronic Pain patients (CP) | ASUR (Autonomous Sensing Unit Recorder)<br>2D, 40 Hz   | 5d<br>8h/d    | S+L               | Total SB           | % of wear time                                                   |                               |
|                                                           |                                                                                           |                                                        |               |                   |                    | Healthy subjects                                                 | 49±11                         |
|                                                           |                                                                                           |                                                        |               |                   |                    | Chronic Pain patients                                            | 63±13                         |
|                                                           |                                                                                           |                                                        |               |                   | Bouts              | Burstiness parameter (B)                                         |                               |
|                                                           |                                                                                           |                                                        |               |                   |                    | Healthy subjects                                                 | 0.40±0.10                     |
|                                                           |                                                                                           |                                                        |               |                   |                    | Chronic Pain patients                                            | 0.33±0.12                     |
|                                                           |                                                                                           |                                                        |               |                   |                    | Memory parameter (M)                                             |                               |
|                                                           |                                                                                           |                                                        |               |                   |                    | Healthy subjects                                                 | 0.08±0.07                     |
|                                                           |                                                                                           |                                                        |               |                   |                    | Chronic Pain patients                                            | 0.11±0.10                     |
|                                                           |                                                                                           |                                                        |               |                   | Breaks             | Burstiness parameter (B)                                         |                               |
|                                                           |                                                                                           |                                                        |               |                   |                    | Healthy subjects                                                 | 0.37±0.05                     |
|                                                           |                                                                                           |                                                        |               |                   |                    | Chronic Pain patients                                            | 0.32±0.12                     |
|                                                           |                                                                                           |                                                        |               |                   |                    | Memory parameter (M)                                             |                               |
|                                                           |                                                                                           |                                                        |               |                   |                    | Healthy subjects                                                 | 0.20±0.13                     |
|                                                           |                                                                                           |                                                        |               |                   |                    | Chronic Pain patients                                            | 0.09±0.07                     |



Pattern measures of sedentary behavior in adults: A literature review.

| Study                     | Population                                      | Sensor & settings                                                                | Data cleaning                                                            | SB classification | SB pattern measure                | Unit                                                                                                                         | Per subject / day (mean ± SD)                                                         |  |
|---------------------------|-------------------------------------------------|----------------------------------------------------------------------------------|--------------------------------------------------------------------------|-------------------|-----------------------------------|------------------------------------------------------------------------------------------------------------------------------|---------------------------------------------------------------------------------------|--|
|                           |                                                 |                                                                                  |                                                                          |                   | Sequence of activity-rest periods | Complementary cumulative probability distribution (CCPD)<br>1. Scaling factor ( $\tau_{\Delta}^{pos}, \tau_{\Delta}^{neg}$ ) | Healthy subjects: 296±133, 413±208<br>Chronic Pain patients: 614±340, 297±158         |  |
|                           |                                                 |                                                                                  |                                                                          |                   |                                   | 2. Characteristic shape parameter ( $\beta_{\Delta}^{pos}, \beta_{\Delta}^{neg}$ )                                           | Healthy subjects: 0.66±0.15, 0.63±0.15<br>Chronic Pain patients: 0.71±0.16, 0.77±0.19 |  |
|                           |                                                 |                                                                                  |                                                                          |                   |                                   | Fano factor scaling component ( $\alpha_F$ )                                                                                 | Healthy subjects: 0.34±0.08<br>Chronic Pain patients: 0.19±0.11                       |  |
|                           |                                                 |                                                                                  |                                                                          |                   | Structural complexity             | Permutation entropy (PE)                                                                                                     | Healthy subjects: 0.28±0.09<br>Chronic Pain patients: 0.16±0.07                       |  |
| (Parry & Straker, 2013)   | N = 50<br>Age: 36.4 ± 8.6<br><br>Office workers | Actical<br>Attached to an elastic belt, worn over the right hip.<br>Epoch: 1 min | ≥4d<br>(≥3 work, ≥1 non-work)<br>≥ 8,34 h/d<br>Non-wear (>120 min zeros) | < 91 cpm          | Wear-time                         | Hours (h)                                                                                                                    |                                                                                       |  |
|                           |                                                 |                                                                                  |                                                                          |                   |                                   | Workdays – all day                                                                                                           | 14.9 ± 1.09                                                                           |  |
|                           |                                                 |                                                                                  |                                                                          |                   |                                   | Workdays – work hours                                                                                                        | 8.9 ± 0.77                                                                            |  |
|                           |                                                 |                                                                                  |                                                                          |                   |                                   | Non-workdays                                                                                                                 | 13.7 ± 1.43                                                                           |  |
|                           |                                                 |                                                                                  |                                                                          |                   |                                   | Total SB                                                                                                                     | Hours(h)                                                                              |  |
|                           |                                                 |                                                                                  |                                                                          |                   |                                   | Workdays – all day                                                                                                           | 11.3 ± 0.98                                                                           |  |
|                           |                                                 |                                                                                  |                                                                          |                   | Non-Workdays                      | 9.30 ± 1.47                                                                                                                  |                                                                                       |  |
|                           |                                                 |                                                                                  |                                                                          |                   |                                   | % of wear time (%)                                                                                                           |                                                                                       |  |
|                           |                                                 |                                                                                  |                                                                          |                   | Workdays – all day                | 75.9                                                                                                                         |                                                                                       |  |
|                           |                                                 |                                                                                  |                                                                          |                   | Non-Workdays                      | 69.7                                                                                                                         |                                                                                       |  |
|                           |                                                 |                                                                                  |                                                                          |                   | Bouts                             | % of wear time; BL: >30 min                                                                                                  |                                                                                       |  |
|                           |                                                 |                                                                                  |                                                                          |                   | Workdays – all day                | 34.1 ± 11.6                                                                                                                  |                                                                                       |  |
| Workdays – work hours     | 40.8 ± 16.6                                     |                                                                                  |                                                                          |                   |                                   |                                                                                                                              |                                                                                       |  |
| Workdays – non-work hours | 22.8 ± 10.9                                     |                                                                                  |                                                                          |                   |                                   |                                                                                                                              |                                                                                       |  |
| Non-workdays              | 26.9 ± 11.1                                     |                                                                                  |                                                                          |                   |                                   |                                                                                                                              |                                                                                       |  |
| Breaks                    | Number (n/SH)                                   |                                                                                  |                                                                          |                   |                                   |                                                                                                                              |                                                                                       |  |
| Workdays – all day        | 6.0 ± 1.4                                       |                                                                                  |                                                                          |                   |                                   |                                                                                                                              |                                                                                       |  |
| Workdays – work hours     | 5.1 ± 1.7                                       |                                                                                  |                                                                          |                   |                                   |                                                                                                                              |                                                                                       |  |

**Pattern measures of sedentary behavior in adults: A literature review.**

| Study                                    | Population                                                               | Sensor & settings                                                                                     | Data cleaning                                                                              | SB classification | SB pattern measure | Unit                      | Per subject / day (mean ± SD)      |
|------------------------------------------|--------------------------------------------------------------------------|-------------------------------------------------------------------------------------------------------|--------------------------------------------------------------------------------------------|-------------------|--------------------|---------------------------|------------------------------------|
|                                          |                                                                          |                                                                                                       |                                                                                            |                   |                    | Workdays – non-work hours | 7.9 ± 2.1                          |
|                                          |                                                                          |                                                                                                       |                                                                                            |                   |                    | Non-workdays              | 9.2 ± 9.8                          |
| (Parry, Straker, Gilson, & Smith, 2013)  | N = 62<br>Age: 41.4 ± 10.9<br><br>Office workers<br>Intervention         | Actigraph GT3X<br>Epoch: 1 min<br>7 days. 60sec epoch.<br>Elastic belt to be worn over the right hip. | ≥4+4d<br>(≥3 work, ≥1 non-work)<br>≥ 8,34 h/d<br>Waking hours<br>Non-wear (≥120 min zeros) | < 100 cpm         | Wear-time          | Hours (h)                 |                                    |
|                                          |                                                                          |                                                                                                       |                                                                                            |                   |                    | Workdays – all day        | 15.37 ± 1.40                       |
|                                          |                                                                          |                                                                                                       |                                                                                            |                   |                    | Workdays – work hours     | 8.36 ± 1.09                        |
|                                          |                                                                          |                                                                                                       |                                                                                            |                   | Total SB           | % of wear time            |                                    |
|                                          |                                                                          |                                                                                                       |                                                                                            |                   |                    | PRE                       | 72.85 ± 7.06                       |
|                                          |                                                                          |                                                                                                       |                                                                                            |                   |                    | Workdays – all day        | 78.29 ± 8.41                       |
|                                          |                                                                          |                                                                                                       |                                                                                            |                   |                    | Workdays – work hours     |                                    |
|                                          |                                                                          |                                                                                                       |                                                                                            |                   |                    | POST                      | 71.25 ± 7.27                       |
|                                          |                                                                          |                                                                                                       |                                                                                            |                   |                    | Workdays – all day        | 76.6 ± 8.6                         |
|                                          |                                                                          |                                                                                                       |                                                                                            |                   | Bouts              | % of wear time; BL: >30   |                                    |
|                                          |                                                                          |                                                                                                       |                                                                                            |                   |                    | PRE                       |                                    |
|                                          |                                                                          |                                                                                                       |                                                                                            |                   |                    | Workdays – all day        | 24.37 ± 12.73                      |
|                                          |                                                                          |                                                                                                       |                                                                                            |                   |                    | Workdays – work hours     | 28.98 ± 19.34                      |
|                                          |                                                                          |                                                                                                       |                                                                                            |                   |                    | POST                      |                                    |
|                                          |                                                                          |                                                                                                       |                                                                                            |                   |                    | Workdays – all day        | 22.29 ± 13.16                      |
| Breaks                                   | Break rate (n/SH)                                                        |                                                                                                       |                                                                                            |                   |                    |                           |                                    |
|                                          | PRE                                                                      |                                                                                                       |                                                                                            |                   |                    |                           |                                    |
|                                          | Workdays – all day                                                       | 7.81 ± 2.45                                                                                           |                                                                                            |                   |                    |                           |                                    |
|                                          | Workdays – work hours                                                    | 6.95 ± 3.20                                                                                           |                                                                                            |                   |                    |                           |                                    |
|                                          | POST                                                                     |                                                                                                       |                                                                                            |                   |                    |                           |                                    |
|                                          | Workdays – all day                                                       | 8.45 ± 2.86                                                                                           |                                                                                            |                   |                    |                           |                                    |
| (Pettapiece-Phillips e.a., 2016)         | N = 50<br>Age = 37.2 (18 – 62)<br>Women<br>- Control<br>- BRCA1 mutation | ActiGraph GT3X<br>Elasticized belt<br>Epoch = 1 sec                                                   | 7d; waking hours<br>≥10h/d<br>Non-wear (≥10 min zeros)                                     | ActiLife<br>6.8.2 | ver. Total SB      | Hours(h)                  |                                    |
|                                          |                                                                          |                                                                                                       |                                                                                            |                   |                    | All subjects              | 8.6 ± 1.5                          |
|                                          |                                                                          |                                                                                                       |                                                                                            |                   |                    | Bouts                     | BL – longest bout (in 7days) (min) |
| (Prince, Blanchard, Grace, & Reid, 2015) | N = 263<br>Age = 63.6 9.3                                                | ActiGraph GT3X<br>Right hip<br>Vector Magnitude<br>Epoch = 1 min                                      | ≥4d; waking hours<br>≥10h/d<br>Non-wear (≥60 min zeros, with gap (2min <150 cpm))          | ≤150 cpm          | Wear-time          | Hours(h)                  |                                    |
|                                          |                                                                          |                                                                                                       |                                                                                            |                   |                    | All subjects              | 14.14 ± 1.30                       |
|                                          |                                                                          |                                                                                                       |                                                                                            |                   |                    | Men                       | 14.21 ± 1.28                       |
|                                          |                                                                          |                                                                                                       |                                                                                            |                   |                    | Women                     | 13.93 ± 1.32                       |

**Pattern measures of sedentary behavior in adults: A literature review.**

| Study                                        | Population                                                                                             | Sensor & settings                                               | Data cleaning                                                               | SB classification                 | SB pattern measure       | Unit                                                                                                                                                                                 | Per subject / day (mean ± SD)          |
|----------------------------------------------|--------------------------------------------------------------------------------------------------------|-----------------------------------------------------------------|-----------------------------------------------------------------------------|-----------------------------------|--------------------------|--------------------------------------------------------------------------------------------------------------------------------------------------------------------------------------|----------------------------------------|
|                                              | Cardiac rehabilitation graduates                                                                       |                                                                 |                                                                             |                                   | Total SB                 | Hours(h)<br>All subjects<br>Men<br>Women                                                                                                                                             | 8.0 ± 1.6<br>8.2 ± 1.5<br>7.2 ± 1.5    |
|                                              |                                                                                                        |                                                                 |                                                                             |                                   | Bouts                    | Number (n); BL: ≥10 min<br>All subjects<br>Men<br>Women                                                                                                                              | 14.1 ± 3.8<br>14.7 ± 3.6<br>12.3 ± 3.7 |
| (Prioreschi, Makda, Tikly, & McVeigh, 2015)  | N = 29<br>Age = 52.7 ± 11<br><br>Rheumatoid Arthritis, women.<br>- normal bone mass<br>- low bone mass | Actical<br>Velcro belt on hip of dominant leg.<br>Epoch = 1 min | ≥4d; waking hours ≥10h/d<br>Non-wear (≥60 min zeros)                        | ≤100cpm                           | Wear-time                | Hours(h)<br>normal bone mass<br>low bone mass                                                                                                                                        | 17 ± 3<br>16 ± 3                       |
|                                              |                                                                                                        |                                                                 |                                                                             |                                   | Total SB                 | % of wear-time (%)<br>normal bone mass<br>low bone mass                                                                                                                              | 65 ± 11<br>74 ± 10                     |
|                                              |                                                                                                        |                                                                 |                                                                             |                                   | Bouts                    | Number (n); BL: ≥60 min<br>normal bone mass<br>low bone mass                                                                                                                         | 7 ± 3<br>8 ± 3                         |
|                                              |                                                                                                        |                                                                 |                                                                             |                                   | Breaks                   | Number (n)<br>normal bone mass<br>low bone mass                                                                                                                                      | 72 ± 21<br>53 ± 18                     |
| (N. Reid e.a., 2013)                         | N = 31<br>Age: 84.2 (range 61.4-95.8)<br><br>Older adults<br>In residential care                       | ActivPAL3™<br>Epoch: 15 seconds                                 | 7d<br>24h/d<br>Waking hours ≥80% or ≥10h of waking time<br>Non-wear (diary) | S+L                               | Waking hours<br>Total SB | Hours(h)<br>(hours) (mean (CI 95%))<br>% of waking hours                                                                                                                             | 14.6 ± 2.0<br>12.4 (11.3, 13.3)<br>85  |
|                                              |                                                                                                        |                                                                 |                                                                             |                                   | Bouts                    | % of Total SB (%)<br>Duration: ≥30 min<br>Duration: ≥60 min<br><br>Bout duration at 10% total SB (min)<br>Bout duration at 50% total SB (min)<br>Bout duration at 90% total SB (min) | 73<br>44<br><br>11<br>53<br>142        |
| (R. E. R. . Reid, Carver, Andersen, Court, & | N = 71<br>Age = 50.27 ± 9.38                                                                           | ActivPAL™3<br>Adhesive patch on mid-thigh<br>Epoch = 15sec      | ≥4d<br>≥22h/d;<br>Sleep time was not analysed                               | Sitting<br><br>Break = Transition | Total SB<br>Breaks       | Hours (h)<br>Number(n)                                                                                                                                                               | 9.74 ± 2.29<br>48.20 ± 15.40           |

**Pattern measures of sedentary behavior in adults: A literature review.**

| Study                                                       | Population                                                                                                                                     | Sensor & settings                                                                           | Data cleaning                                                                                                                                                                                            | SB classification        | SB pattern measure | Unit                                | Per subject / day (mean ± SD) |
|-------------------------------------------------------------|------------------------------------------------------------------------------------------------------------------------------------------------|---------------------------------------------------------------------------------------------|----------------------------------------------------------------------------------------------------------------------------------------------------------------------------------------------------------|--------------------------|--------------------|-------------------------------------|-------------------------------|
| Andersen, 2015)                                             | Adults, post bariatric surgery                                                                                                                 |                                                                                             |                                                                                                                                                                                                          | from sitting to standing |                    |                                     |                               |
| (L. B. . c Sardinha, Santos, Silva, Baptista, & Owen, 2015) | N = 215<br>Age = 73.3 ± 5.9<br>Non-institutionalized older adults                                                                              | ActiGraph GT1M<br>Right hip, near iliac crest<br>Epoch: 15sec → 1 min                       | ≥3d, incl. 1 weekend day<br>≥10h/d<br>Non-wear (≥60 min zeros)                                                                                                                                           | <100 cpm                 | Wear-time          | Hours(h)                            | 13.38 ± 1.58                  |
|                                                             |                                                                                                                                                |                                                                                             |                                                                                                                                                                                                          |                          | Total SB           | Hours(h)                            | 8.55 ± 1.89                   |
|                                                             |                                                                                                                                                |                                                                                             |                                                                                                                                                                                                          |                          | Breaks             | Number(n)                           | 78.9 ± 16.0                   |
| (L. B. Sardinha e.a., 2015)                                 | N = 371<br>Age = 74.7 ± 6.9<br>Non-institutionalized older adults<br>- Low risk for physical dependence<br>- High risk for physical dependence | ActiGraph GT1M<br>Right hip, near iliac crest<br>Epoch: 15sec → 1 min                       | ≥3d, incl. 1 weekend day<br>≥10h/d<br>Non-wear (≥60 min zeros)                                                                                                                                           | <100 cpm                 | Wear-time          | Hours(h)                            |                               |
|                                                             |                                                                                                                                                |                                                                                             |                                                                                                                                                                                                          |                          |                    | All subjects                        | 13.72 ± 1.54                  |
|                                                             |                                                                                                                                                |                                                                                             |                                                                                                                                                                                                          |                          |                    | Low risk for physical dependence    | 13.87 ± 1.57                  |
|                                                             |                                                                                                                                                |                                                                                             |                                                                                                                                                                                                          |                          |                    | High risk for physical dependence   | 13.30 ± 1.34                  |
|                                                             |                                                                                                                                                |                                                                                             |                                                                                                                                                                                                          |                          | Total SB           | Hours(h)                            |                               |
|                                                             |                                                                                                                                                |                                                                                             |                                                                                                                                                                                                          |                          |                    | All subjects                        | 9.00 ± 2.16                   |
|                                                             |                                                                                                                                                |                                                                                             |                                                                                                                                                                                                          |                          |                    | Low risk for physical dependence    | 8.76 ± 2.09                   |
|                                                             |                                                                                                                                                |                                                                                             |                                                                                                                                                                                                          |                          |                    | High risk for physical dependence   | 9.70 ± 2.21                   |
|                                                             |                                                                                                                                                |                                                                                             |                                                                                                                                                                                                          |                          | Breaks             | Number(n)                           |                               |
|                                                             |                                                                                                                                                |                                                                                             |                                                                                                                                                                                                          |                          |                    | All subjects                        | 74.9 ± 20.0                   |
|                                                             | Low risk for physical dependence                                                                                                               | 78.0 ± 17.6                                                                                 |                                                                                                                                                                                                          |                          |                    |                                     |                               |
|                                                             | High risk for physical dependence                                                                                                              | 65.9 ± 23.6                                                                                 |                                                                                                                                                                                                          |                          |                    |                                     |                               |
|                                                             | Number per SB hour (n/SH)                                                                                                                      |                                                                                             |                                                                                                                                                                                                          |                          |                    |                                     |                               |
|                                                             | All subjects                                                                                                                                   | 9.0 ± 3.6                                                                                   |                                                                                                                                                                                                          |                          |                    |                                     |                               |
|                                                             | Low risk for physical dependence                                                                                                               | 9.5 ± 3.3                                                                                   |                                                                                                                                                                                                          |                          |                    |                                     |                               |
|                                                             | High risk for physical dependence                                                                                                              | 7.5 ± 3.9                                                                                   |                                                                                                                                                                                                          |                          |                    |                                     |                               |
| (Sartini e.a., 2015)                                        | N = 1455<br>Age = 78.5 ± 4.6<br><br>Older men                                                                                                  | ActiGraph GT3X<br>Only vertical axis<br>On elasticated belt over right hip<br>Epoch = 1 min | ≥3d; waking hours<br>≥10h/d<br>Non-wear (≥90 min zeros, with gap (2min if ≥30 min before and after))<br>Only hours with ≥45 valid wear minutes were included.<br>Means were adjusted for various factors | <100cpm                  | Wear-time          | Hours(h, range)                     | 14.22 (14.17,14.28)           |
|                                                             |                                                                                                                                                |                                                                                             |                                                                                                                                                                                                          |                          | Total SB           | % of wear-time (%)                  | 72.6 (72.1, 73.0)             |
|                                                             |                                                                                                                                                |                                                                                             |                                                                                                                                                                                                          |                          | Bouts              | % of bouts at period of the day (%) |                               |
|                                                             |                                                                                                                                                |                                                                                             |                                                                                                                                                                                                          |                          | ≥60 min            | Evenings (7 p, - 10.59 pm)          | 49                            |
|                                                             |                                                                                                                                                |                                                                                             |                                                                                                                                                                                                          |                          |                    | 8-9 pm                              | 13.6                          |
|                                                             |                                                                                                                                                |                                                                                             |                                                                                                                                                                                                          |                          |                    | 9-10 pm                             | 14.0                          |
|                                                             |                                                                                                                                                |                                                                                             |                                                                                                                                                                                                          |                          |                    |                                     |                               |
|                                                             | N = 442                                                                                                                                        |                                                                                             | ≥ 6d (incl. Sat. and Sun.)                                                                                                                                                                               | MET ≤ 1.8                | Total SB           | (hours)                             |                               |

**Pattern measures of sedentary behavior in adults: A literature review.**

| Study                                    | Population                            | Sensor & settings                                                                                  | Data cleaning                                         | SB classification | SB pattern measure | Unit                  | Per subject / day (mean ± SD) |                   |
|------------------------------------------|---------------------------------------|----------------------------------------------------------------------------------------------------|-------------------------------------------------------|-------------------|--------------------|-----------------------|-------------------------------|-------------------|
| (Scheers, Philippaerts, & Lefevre, 2012) | Age: 41.4 ± 9.8                       | SenseWear Pro3 Armband (SWA)<br>Epoch: 1 min<br><br>Worn over the triceps muscle of the right arm. | ≥ 95% of 24h/d (Except during water-based activities) | (incl. sleep)     |                    | Men – normal weight   | 16.82 ± 1.87                  |                   |
|                                          |                                       |                                                                                                    |                                                       |                   |                    | Women – normal weight | 16.48 ± 1.59                  |                   |
|                                          |                                       |                                                                                                    |                                                       |                   |                    | Men – Overweight      | 17.37 ± 1.84                  |                   |
|                                          |                                       |                                                                                                    |                                                       |                   |                    | Women – Overweight    | 17.52 ± 1.56                  |                   |
|                                          |                                       |                                                                                                    |                                                       |                   |                    | Men – Obese           | 17.91 ± 1.60                  |                   |
|                                          |                                       |                                                                                                    |                                                       |                   |                    | Women – Obese         | 18.36 ± 2.00                  |                   |
|                                          |                                       |                                                                                                    |                                                       |                   | Bouts              | BL (min)              |                               |                   |
|                                          |                                       |                                                                                                    |                                                       |                   |                    | Men – normal weight   | 13.63 ± 4.49                  |                   |
|                                          |                                       |                                                                                                    |                                                       |                   |                    | Women – normal weight | 13.09 ± 3.03                  |                   |
|                                          |                                       |                                                                                                    |                                                       |                   |                    | Men – Overweight      | 14.52 ± 3.56                  |                   |
|                                          |                                       |                                                                                                    |                                                       |                   |                    | Women – Overweight    | 15.41 ± 3.68                  |                   |
|                                          |                                       |                                                                                                    |                                                       |                   |                    | Men – Obese           | 15.52 ± 3.66                  |                   |
|                                          |                                       |                                                                                                    |                                                       |                   | Breaks             | Number (n)            |                               |                   |
|                                          |                                       |                                                                                                    |                                                       |                   |                    | Men – normal weight   | 77.79 ± 15.17                 |                   |
|                                          |                                       |                                                                                                    |                                                       |                   |                    | Women – normal weight | 77.13 ± 12.21                 |                   |
| Men – Overweight                         | 73.65 ± 12.61                         |                                                                                                    |                                                       |                   |                    |                       |                               |                   |
| Women – Overweight                       | 69.98 ± 13.26                         |                                                                                                    |                                                       |                   |                    |                       |                               |                   |
| Men – Obese                              | 70.84 ± 10.90                         |                                                                                                    |                                                       |                   |                    |                       |                               |                   |
| (Shiroma, Freedson, Trost, & Lee, 2013a) | N = 7247<br>Women<br>Age = 71.4 ± 5.8 | Actigraph GT3X+                                                                                    | ≥ 4d<br>≥ 10h/d<br>Waking hours                       | < 100 cpm         | Wear-time          | Hours (h)             | 14.8 ± 1.2                    |                   |
|                                          |                                       |                                                                                                    |                                                       |                   |                    | Total SB              | Hours (h)                     | 9.7 ± 1.5         |
|                                          |                                       |                                                                                                    |                                                       |                   |                    |                       | % of wear time (95% CI)       | 65.5 (65.5, 64.7) |
|                                          |                                       |                                                                                                    |                                                       |                   | Breaks             |                       | Number (n/SH) (95% CI)        | 9.0 (9.0, 9.1)    |
|                                          |                                       |                                                                                                    |                                                       |                   | Bouts              | Number (n) (95% CI)   | 85.9 (85.5, 86.3)             |                   |
|                                          |                                       |                                                                                                    |                                                       |                   |                    | Number (n)            |                               |                   |
|                                          |                                       |                                                                                                    |                                                       |                   |                    | Duration: >1 min      | 85.9 ± 16.1                   |                   |
|                                          |                                       |                                                                                                    |                                                       |                   |                    | Duration: ≥5 min      | 29.8 ± 4.7                    |                   |
|                                          |                                       |                                                                                                    |                                                       |                   |                    | Duration: ≥10 min     | 15.9 ± 3.2                    |                   |
|                                          |                                       |                                                                                                    |                                                       |                   |                    | Duration: ≥20 min     | 7.0 ± 2.2                     |                   |
|                                          |                                       |                                                                                                    |                                                       |                   |                    | Duration: ≥30 min     | 3.8 ± 1.6                     |                   |
|                                          |                                       |                                                                                                    |                                                       |                   |                    | Duration: ≥40 min     | 2.2 ± 1.2                     |                   |
|                                          |                                       |                                                                                                    |                                                       |                   |                    | Duration: ≥50 min     | 1.4 ± 0.9                     |                   |
|                                          |                                       |                                                                                                    |                                                       |                   | Duration: ≥60 min  | 0.9 ± 0.7             |                               |                   |

Pattern measures of sedentary behavior in adults: A literature review.

| Study                                    | Population                                     | Sensor & settings | Data cleaning                   | SB classification | SB pattern measure                     | Unit                                                                | Per subject / day (mean ± SD)                                                                                                              |
|------------------------------------------|------------------------------------------------|-------------------|---------------------------------|-------------------|----------------------------------------|---------------------------------------------------------------------|--------------------------------------------------------------------------------------------------------------------------------------------|
|                                          |                                                |                   |                                 |                   |                                        | % of Bouts                                                          |                                                                                                                                            |
|                                          |                                                |                   |                                 |                   |                                        | Duration: >1 min                                                    | 100                                                                                                                                        |
|                                          |                                                |                   |                                 |                   |                                        | Duration: ≥5 min                                                    | 35.5 ± 6.7                                                                                                                                 |
|                                          |                                                |                   |                                 |                   |                                        | Duration: ≥10 min                                                   | 19.4 ± 5.9                                                                                                                                 |
|                                          |                                                |                   |                                 |                   |                                        | Duration: ≥20 min                                                   | 8.7 ± 4.1                                                                                                                                  |
|                                          |                                                |                   |                                 |                   |                                        | Duration: ≥30 min                                                   | 4.8 ± 2.9                                                                                                                                  |
|                                          |                                                |                   |                                 |                   |                                        | Duration: ≥40 min                                                   | 2.9 ± 2.1                                                                                                                                  |
|                                          |                                                |                   |                                 |                   |                                        | Duration: ≥50 min                                                   | 1.8 ± 1.6                                                                                                                                  |
|                                          |                                                |                   |                                 |                   |                                        | Duration: ≥60 min                                                   | 1.2 ± 1.2                                                                                                                                  |
|                                          |                                                |                   |                                 |                   |                                        | % of Total SB (%)                                                   |                                                                                                                                            |
|                                          |                                                |                   |                                 |                   |                                        | Duration: >1 min                                                    | 100                                                                                                                                        |
|                                          |                                                |                   |                                 |                   |                                        | Duration: ≥5 min                                                    | 81.6 ± 6.4                                                                                                                                 |
|                                          |                                                |                   |                                 |                   |                                        | Duration: ≥10 min                                                   | 65.5 ± 10.1                                                                                                                                |
|                                          |                                                |                   |                                 |                   |                                        | Duration: ≥20 min                                                   | 44.5 ± 12.5                                                                                                                                |
|                                          |                                                |                   |                                 |                   |                                        | Duration: ≥30 min                                                   | 31.5 ± 12.4                                                                                                                                |
|                                          |                                                |                   |                                 |                   |                                        | Duration: ≥40 min                                                   | 22.7 ± 11.3                                                                                                                                |
|                                          |                                                |                   |                                 |                   |                                        | Duration: ≥50 min                                                   | 16.5 ± 10.0                                                                                                                                |
|                                          |                                                |                   |                                 |                   |                                        | Duration: ≥60 min                                                   | 11.9 ± 8.6                                                                                                                                 |
| (Shiroma, Freedson, Trost, & Lee, 2013b) | N = 5032<br>Mean Age = 70.1<br><br>Older women | Actigraph GT3X+   | ≥ 4d<br>≥ 10h/d<br>Waking hours | < 100 cpm         | Wear-time<br><br>Total SB<br><br>Bouts | Hours (h (SE))<br><br>Hours (h)<br><br>Number (n) (median (95% CI)) | 14.3 (+0.02)<br><br>9.6<br><br>67.5<br><br>79.3 (78.7, 79.8)<br>27.9 (27.7, 28.0)<br>15.2 (15.1, 15.3)<br>6.7 (6.7, 6.8)<br>3.6 (3.6, 3.7) |
|                                          |                                                |                   |                                 |                   |                                        | % of wear time (median)                                             |                                                                                                                                            |
|                                          |                                                |                   |                                 |                   |                                        | % of Total SB (%) (median (95% CI))                                 |                                                                                                                                            |
|                                          |                                                |                   |                                 |                   |                                        | Duration: 1 min                                                     | 100                                                                                                                                        |
|                                          |                                                |                   |                                 |                   |                                        | Duration: 5 min                                                     | 35.6 (33.4, 35.9)                                                                                                                          |
|                                          |                                                |                   |                                 |                   |                                        | Duration: 10 min                                                    | 19.4 (19.2, 19.6)                                                                                                                          |
|                                          |                                                |                   |                                 |                   |                                        | Duration: 20 min                                                    | 8.5 (8.4, 8.6)                                                                                                                             |
|                                          |                                                |                   |                                 |                   |                                        | Duration: 30 min                                                    | 4.6 (4.5, 4.7)                                                                                                                             |
|                                          | N = 33                                         | ActivPAL          |                                 | Sitting           | Total SB                               | % of wear-time (%)                                                  | 77,0 ± 17.8                                                                                                                                |

**Pattern measures of sedentary behavior in adults: A literature review.**

| Study                                                                 | Population                                                                                                                       | Sensor & settings                                                                   | Data cleaning                                           | SB classification                                  | SB pattern measure          | Unit                                                                                                                                                                                                                                                                                                                                                                                                              | Per subject / day (mean ± SD)                                                                                                                                                                                                                                                                      |
|-----------------------------------------------------------------------|----------------------------------------------------------------------------------------------------------------------------------|-------------------------------------------------------------------------------------|---------------------------------------------------------|----------------------------------------------------|-----------------------------|-------------------------------------------------------------------------------------------------------------------------------------------------------------------------------------------------------------------------------------------------------------------------------------------------------------------------------------------------------------------------------------------------------------------|----------------------------------------------------------------------------------------------------------------------------------------------------------------------------------------------------------------------------------------------------------------------------------------------------|
| (Spinney e.a., 2015)                                                  | Office workers                                                                                                                   |                                                                                     | Analysis only during office hours                       | S → S                                              | Breaks                      | Number per SB hour (n/SH)                                                                                                                                                                                                                                                                                                                                                                                         | 4.0 ± 2.8                                                                                                                                                                                                                                                                                          |
| (Straker e.a., 2014)                                                  | N = 24 (3*8)<br>Age: 38.2 ± 8.3<br>Occupational groups:<br>1) Seated office workers<br>2) Standing office workers<br>3) Teachers | Actical (omnidirectional)<br>On belt over right anterior iliac spine<br>Epoch: 1min | 4d                                                      | < 91 cpm                                           | Bouts<br><br>Breaks + Bouts | % of Wear-time (%); BL: >30 min<br>Seated office workers<br>Standing office workers<br>Teachers<br><br>% of Wear-time (%); BL: 0-5 min<br>Seated office workers<br>Standing office workers<br>Teachers                                                                                                                                                                                                            | 37.3<br>25.7<br>15.7<br><br>21.8<br>26.8<br>34.6                                                                                                                                                                                                                                                   |
| (Tieges e.a., 2015)                                                   | N = 96<br>Age = 72.2 (64-80)<br><br>Patients with acute stroke                                                                   | ActivPAL<br>On unaffected leg                                                       | 7d Including sleep<br>≥24h/d                            | S+L<br><br>Sleep time was included in the analysis | Total SB<br><br>Bouts       | % of day (24h)<br>Hours of day (24h) (median (IQR))<br>Overall<br>1mo after stroke<br>6mo after stroke<br>12mo after stroke<br><br>% of Total SB (%) (BL is median IQR)<br>Overall - BL: 102 min<br>1mo after stroke - BL: 99 min<br>6mo after stroke - BL: 102.6 min<br>12mo after stroke - BL: 102 min<br><br>Number per SB hour (n/SH)<br>Overall<br>1mo after stroke<br>6mo after stroke<br>12mo after stroke | 81<br><br>19.5 (18.1 – 21.2)<br>19.9 (18.4 – 22.1)<br>19.1 (17.8 – 20.8)<br>19.3 (17.3 – 20.9)<br><br>50 (W <sub>50</sub> )<br>50 (W <sub>50</sub> )<br>50 (W <sub>50</sub> )<br>50 (W <sub>50</sub> )<br><br>2.30 (1.80 – 2.90)<br>2.21 (1.70 – 2.88)<br>2.41 (1.87 – 2.96)<br>2.48 (1.91 – 2.94) |
| (Van Cauwenberg, Van Holle, De Bourdeaudhuij, Owen, & Deforche, 2015) | N = 442<br>Age = 74.2 ± 6.2<br><br>Older adults                                                                                  | ActiGraph GT3X+<br>Epoch = 1 min                                                    | ≥5d; waking hours<br>≥10h/d<br>Non-wear (≥90 min zeros) | <100 cpm                                           | Total SB                    | Hours(h)<br>Overall<br><br>% of wear-time (%)<br>Morning (7h-12h)<br>Afternoon (12h-17h)<br>Evening (17h-23h)                                                                                                                                                                                                                                                                                                     | 9.67 ± 1.63<br><br>50.33<br>66.40<br>68.47                                                                                                                                                                                                                                                         |

**Pattern measures of sedentary behavior in adults: A literature review.**

| Study                     | Population                                                                                                                                                                                                                                                                           | Sensor & settings           | Data cleaning                                                                                    | SB classification | SB pattern measure | Unit               | Per subject / day (mean ± SD)  |                 |
|---------------------------|--------------------------------------------------------------------------------------------------------------------------------------------------------------------------------------------------------------------------------------------------------------------------------------|-----------------------------|--------------------------------------------------------------------------------------------------|-------------------|--------------------|--------------------|--------------------------------|-----------------|
| (van der Berg e.a., 2016) | N = 2497<br>Age = 60.0 ± 8.1<br><br>Adults:<br>- Normal glucose metabolism (NGM)<br>- Impaired glucose metabolism (IGM)<br>- Type 2 Diabetes Mellitus (T2DM)<br><br>And stratification to number of metabolic syndrome criteria:<br>- 0 criteria<br>- 1-2 criteria<br>- 3-5 criteria | ActivPAL3<br>On right thigh | 8d (24h/d)<br>≥14h/d of waking time<br>Automated algorithm to identify waking time versus sleep. | S+L               | Waking-time        | Hours (h)          | 15.7 ± 0.9                     |                 |
|                           |                                                                                                                                                                                                                                                                                      |                             |                                                                                                  |                   |                    | All subjects       | 15.7 ± 0.9                     |                 |
|                           |                                                                                                                                                                                                                                                                                      |                             |                                                                                                  |                   |                    | NGM                | 15.8 ± 0.8                     |                 |
|                           |                                                                                                                                                                                                                                                                                      |                             |                                                                                                  |                   |                    | IGM                | 15.7 ± 1.0                     |                 |
|                           |                                                                                                                                                                                                                                                                                      |                             |                                                                                                  |                   | Total SB           | Hours (h (95%CI))  |                                |                 |
|                           |                                                                                                                                                                                                                                                                                      |                             |                                                                                                  |                   |                    | NGM                | 9.06 (9.0, 9.1)                |                 |
|                           |                                                                                                                                                                                                                                                                                      |                             |                                                                                                  |                   |                    | IGM                | 9.46 (9.3,9.6)                 |                 |
|                           |                                                                                                                                                                                                                                                                                      |                             |                                                                                                  |                   |                    | T2DM               | 10.10 (10.0, 10.2)             |                 |
|                           |                                                                                                                                                                                                                                                                                      |                             |                                                                                                  |                   |                    | 0 criteria         | 8.69 (8.5, 8.9)                |                 |
|                           |                                                                                                                                                                                                                                                                                      |                             |                                                                                                  |                   |                    | 1-2 criteria       | 9.19 (9.1, 9.3)                |                 |
|                           |                                                                                                                                                                                                                                                                                      |                             |                                                                                                  |                   |                    | 3-5 criteria       | 9.96 (9.9, 10.1)               |                 |
|                           |                                                                                                                                                                                                                                                                                      |                             |                                                                                                  |                   |                    | Bouts              | Number (n (95%CI)); BL: ≥30min |                 |
|                           |                                                                                                                                                                                                                                                                                      |                             |                                                                                                  |                   |                    |                    | NGM                            | 4.55 (4.5, 4.6) |
|                           |                                                                                                                                                                                                                                                                                      |                             |                                                                                                  |                   |                    |                    | IGM                            | 4.88 (4.7, 5.0) |
|                           |                                                                                                                                                                                                                                                                                      |                             |                                                                                                  |                   |                    |                    | T2DM                           | 5.42 (5.3, 5.5) |
|                           |                                                                                                                                                                                                                                                                                      |                             |                                                                                                  |                   |                    |                    | 0 criteria                     | 4.24 (4.1, 4.4) |
|                           |                                                                                                                                                                                                                                                                                      |                             |                                                                                                  |                   | 1-2 criteria       |                    | 4.64 (4.6, 4.7)                |                 |
|                           |                                                                                                                                                                                                                                                                                      |                             |                                                                                                  |                   | 3-5 criteria       |                    | 5.32 (5.2, 5.4)                |                 |
|                           |                                                                                                                                                                                                                                                                                      |                             |                                                                                                  |                   | BL (min)           |                    |                                |                 |
|                           |                                                                                                                                                                                                                                                                                      |                             |                                                                                                  |                   | NGM                |                    | 10.54 (10.4, 10.7)             |                 |
|                           |                                                                                                                                                                                                                                                                                      |                             |                                                                                                  |                   | IGM                |                    | 11.15 (10.8, 11.5)             |                 |
|                           |                                                                                                                                                                                                                                                                                      |                             |                                                                                                  |                   | Breaks             | Number (n (95%CI)) |                                |                 |
|                           |                                                                                                                                                                                                                                                                                      |                             |                                                                                                  |                   |                    | NGM                | 55.69 (55.0, 56.4)             |                 |
|                           |                                                                                                                                                                                                                                                                                      |                             |                                                                                                  |                   |                    | IGM                | 55.00 (53.5, 56.5)             |                 |
| T2DM                      | 52.78 (51.7, 53.9)                                                                                                                                                                                                                                                                   |                             |                                                                                                  |                   |                    |                    |                                |                 |
| 0 criteria                | 57.11 (55.7, 58.5)                                                                                                                                                                                                                                                                   |                             |                                                                                                  |                   |                    |                    |                                |                 |
| 1-2 criteria              | 55.73 (54.9, 56.5)                                                                                                                                                                                                                                                                   |                             |                                                                                                  |                   |                    |                    |                                |                 |
| 3-5 criteria              | 52.71 (51.8, 53.6)                                                                                                                                                                                                                                                                   |                             |                                                                                                  |                   |                    |                    |                                |                 |



**Pattern measures of sedentary behavior in adults: A literature review.**

| Study                          | Population                                                                                                                                                                                                 | Sensor & settings         | Data cleaning                                                                                                                                                                            | SB classification | SB pattern measure | Unit                           | Per subject / day (mean ± SD) |  |
|--------------------------------|------------------------------------------------------------------------------------------------------------------------------------------------------------------------------------------------------------|---------------------------|------------------------------------------------------------------------------------------------------------------------------------------------------------------------------------------|-------------------|--------------------|--------------------------------|-------------------------------|--|
| (Van Dommelen e.a., 2016)      | N = 205<br>Age = 45.8 ± 9.6<br><br>Adults; stratification based on occupation:<br>- financial service provider – white collar<br>- research institute white collar<br>- construction company – blue collar | ActiGraph<br>On right hip | ≥4d, waking hours<br>≥2 work days (≥3h work)<br>≥10h/d wear-time<br>Non-wear (≥60 min zeros, with gap (2min <100 cpm))<br><br>Analysis of:<br>1) total wear-time<br>2) occupational time | <100 cpm          | Wear-time          | Hours(h)                       |                               |  |
|                                |                                                                                                                                                                                                            |                           |                                                                                                                                                                                          |                   |                    | Total time                     |                               |  |
|                                |                                                                                                                                                                                                            |                           |                                                                                                                                                                                          |                   |                    | white collar, financial, men   | 14.9 ± 1.1                    |  |
|                                |                                                                                                                                                                                                            |                           |                                                                                                                                                                                          |                   |                    | white collar, financial, women | 14.7 ± 1.0                    |  |
|                                |                                                                                                                                                                                                            |                           |                                                                                                                                                                                          |                   |                    | white collar, research, men    | 15.0 ± 0.8                    |  |
|                                |                                                                                                                                                                                                            |                           |                                                                                                                                                                                          |                   |                    | white collar, research, women  | 14.8 ± 0.8                    |  |
|                                |                                                                                                                                                                                                            |                           |                                                                                                                                                                                          |                   |                    | blue collar, construction, men | 15.4 ± 1.2                    |  |
|                                |                                                                                                                                                                                                            |                           |                                                                                                                                                                                          |                   |                    | Occupational time              |                               |  |
|                                |                                                                                                                                                                                                            |                           |                                                                                                                                                                                          |                   |                    | white collar, financial, men   | 8.5 ± 1.0                     |  |
|                                |                                                                                                                                                                                                            |                           |                                                                                                                                                                                          |                   |                    | white collar, financial, women | 8.3 ± 1.0                     |  |
|                                |                                                                                                                                                                                                            |                           |                                                                                                                                                                                          |                   |                    | white collar, research, men    | 8.2 ± 1.1                     |  |
|                                |                                                                                                                                                                                                            |                           |                                                                                                                                                                                          |                   |                    | white collar, research, women  | 7.8 ± 1.5                     |  |
|                                |                                                                                                                                                                                                            |                           |                                                                                                                                                                                          |                   |                    | blue collar, construction, men | 7.7 ± 0.7                     |  |
|                                |                                                                                                                                                                                                            |                           |                                                                                                                                                                                          |                   |                    | Total SB                       | % of Wear-time (%)            |  |
|                                |                                                                                                                                                                                                            |                           |                                                                                                                                                                                          |                   |                    | Total time                     |                               |  |
|                                |                                                                                                                                                                                                            |                           |                                                                                                                                                                                          |                   |                    | white collar, financial, men   | 70.0 ± 5.2                    |  |
|                                |                                                                                                                                                                                                            |                           |                                                                                                                                                                                          |                   |                    | white collar, financial, women | 67.4 ± 6.9                    |  |
|                                |                                                                                                                                                                                                            |                           |                                                                                                                                                                                          |                   |                    | white collar, research, men    | 65.7 ± 5.3                    |  |
|                                |                                                                                                                                                                                                            |                           |                                                                                                                                                                                          |                   |                    | white collar, research, women  | 63.5 ± 6.9                    |  |
|                                |                                                                                                                                                                                                            |                           |                                                                                                                                                                                          |                   |                    | blue collar, construction, men | 55.5 ± 9.3                    |  |
| Occupational time              |                                                                                                                                                                                                            |                           |                                                                                                                                                                                          |                   |                    |                                |                               |  |
| white collar, financial, men   | 78.5 ± 5.6                                                                                                                                                                                                 |                           |                                                                                                                                                                                          |                   |                    |                                |                               |  |
| white collar, financial, women | 79.5 ± 5.9                                                                                                                                                                                                 |                           |                                                                                                                                                                                          |                   |                    |                                |                               |  |
| white collar, research, men    | 77.0 ± 7.4                                                                                                                                                                                                 |                           |                                                                                                                                                                                          |                   |                    |                                |                               |  |
| white collar, research, women  | 76.3 ± 7.6                                                                                                                                                                                                 |                           |                                                                                                                                                                                          |                   |                    |                                |                               |  |
| blue collar, construction, men | 43.6 ± 16.9                                                                                                                                                                                                |                           |                                                                                                                                                                                          |                   |                    |                                |                               |  |
| Bouts                          | % of Total SB (%) BL: ≥30 min                                                                                                                                                                              |                           |                                                                                                                                                                                          |                   |                    |                                |                               |  |
| Total time                     |                                                                                                                                                                                                            |                           |                                                                                                                                                                                          |                   |                    |                                |                               |  |
| white collar, financial, men   | 22.3 ± 8.9                                                                                                                                                                                                 |                           |                                                                                                                                                                                          |                   |                    |                                |                               |  |
| white collar, financial, women | 21.9 ± 11.2                                                                                                                                                                                                |                           |                                                                                                                                                                                          |                   |                    |                                |                               |  |
| white collar, research, men    | 22.2 ± 6.9                                                                                                                                                                                                 |                           |                                                                                                                                                                                          |                   |                    |                                |                               |  |
| white collar, research, women  | 19.2 ± 7.6                                                                                                                                                                                                 |                           |                                                                                                                                                                                          |                   |                    |                                |                               |  |
| blue collar, construction, men | 12.2 ± 7.1                                                                                                                                                                                                 |                           |                                                                                                                                                                                          |                   |                    |                                |                               |  |
| Occupational time              |                                                                                                                                                                                                            |                           |                                                                                                                                                                                          |                   |                    |                                |                               |  |
| white collar, financial, men   | 27.4 ± 16.3                                                                                                                                                                                                |                           |                                                                                                                                                                                          |                   |                    |                                |                               |  |
| white collar, financial, women | 29.8 ± 17.9                                                                                                                                                                                                |                           |                                                                                                                                                                                          |                   |                    |                                |                               |  |

**Pattern measures of sedentary behavior in adults: A literature review.**

| Study | Population | Sensor & settings | Data cleaning | SB classification | SB pattern measure | Unit                           | Per subject / day (mean ± SD) |
|-------|------------|-------------------|---------------|-------------------|--------------------|--------------------------------|-------------------------------|
|       |            |                   |               |                   |                    | white collar, research, men    | 30.0 ± 14.9                   |
|       |            |                   |               |                   |                    | white collar, research, women  | 28.3 ± 15.1                   |
|       |            |                   |               |                   |                    | blue collar, construction, men | 7.2 ± 10.7                    |

## References

- Barber, S. E., Forster, A., & Birch, K. M. (2015). Levels and Patterns of Daily Physical Activity and Sedentary Behavior Measured Objectively in Older Care Home Residents in the United Kingdom. *Journal of Aging and Physical Activity*, 23(1), 133–143. <https://doi.org/10.1123/JAPA.2013-0091>
- Barreira, T. V. . b, Zderic, T. W. ., Schuna, J. M. . c, Hamilton, M. T. ., & Tudor-Locke, C. . (2015). Free-living activity counts-derived breaks in sedentary time: Are they real transitions from sitting to standing? *Gait and Posture*, 42(1), 70–72. <https://doi.org/10.1016/j.gaitpost.2015.04.008>
- Baruth, M. ., Sharpe, P. A. ., Hutto, B. ., Wilcox, S. ., & Warren, T. Y. . (2013). Patterns of sedentary behavior in overweight and obese women. *Ethnicity and Disease*, 23(3), 336–342.
- Bellettiere, J., Carlson, J. A., Rosenberg, D., Singhania, A., Natarajan, L., Berardi, V., ... Kerr, J. (2015). Gender and Age Differences in Hourly and Daily Patterns of Sedentary Time in Older Adults Living in Retirement Communities. *Plos One*, 10(8), e0136161. <https://doi.org/10.1371/journal.pone.0136161>
- Blikman, L. J. ., Van Meeteren, J. ., Horemans, H. L. ., Kortenhorst, I. C. ., Beckerman, H. ., Stam, H. J. ., & Bussmann, J. B. . (2015). Is physical behavior affected in fatigued persons with multiple sclerosis? *Archives of Physical Medicine and Rehabilitation*, 96(1), 24–29. <https://doi.org/10.1016/j.apmr.2014.08.023>
- Boerema, S. T. . b, Essink, G. B. . b, Tönis, T. M. . b, van Velsen, L. . b, & Hermens, H. J. . b. (2015). Sedentary behaviour profiling of officeworkers: A sensitivity analysis of sedentary cut-points. *Sensors (Switzerland)*, 16(1). <https://doi.org/10.3390/s16010022>
- Carson, V. . b, Wong, S. L. ., Winkler, E. ., Healy, G. N. . e, Colley, R. C. . f, & Tremblay, M. S. . f. (2014). Patterns of sedentary time and cardiometabolic risk among Canadian adults. *Preventive Medicine*, 65, 23–27. <https://doi.org/10.1016/j.ypmed.2014.04.005>
- Cavanaugh, J. T. ., Kochi, N. ., & Stergiou, N. . c. (2010). Nonlinear analysis of ambulatory activity patterns in community-dwelling older adults. *Journals of Gerontology - Series A Biological Sciences and Medical Sciences*, 65(2), 197–203. <https://doi.org/10.1093/gerona/glp144>
- Chapman, J. J., Fraser, S. J., Brown, W. J., & Burton, N. W. (2015). Physical activity and sedentary behaviour of adults with mental illness. *Journal of Science and Medicine in Sport*. <https://doi.org/10.1016/j.jsams.2015.07.017>
- Chastin, S. F. ., Baker, K. ., Jones, D. ., Burn, D. ., Granat, M. H. ., & Rochester, L. . c. (2010). The pattern of habitual sedentary behavior is different in advanced Parkinson's disease. *Movement Disorders*, 25(13), 2114–2120.
- Chastin, S. F. M. ., Mandrichenko, O. ., Helbostadt, J. L. ., & Skelton, D. A. . (2014). Associations between objectively-measured sedentary behaviour and physical activity with bone mineral density in adults and older adults, the NHANES study. *Bone*, 64, 254–262. <https://doi.org/10.1016/j.bone.2014.04.009>
- Chastin, S. F. M., & Granat, M. H. (2010). Methods for objective measure, quantification and analysis of sedentary behaviour and inactivity. *Gait and Posture*, 31(1), 82–86. <https://doi.org/10.1016/j.gaitpost.2009.09.002>

## Pattern measures of sedentary behavior in adults: A literature review.

- Chastin, S. F. M., Winkler, E. A. H., Eakin, E. G., Gardiner, P. A., Dunstan, D. W., Owen, N., & Healy, G. N. (2015). Sensitivity to Change of Objectively-Derived Measures of Sedentary Behavior. *Measurement in Physical Education and Exercise Science*, 19(3), 138–147. <https://doi.org/10.1080/1091367X.2015.1050592>
- Chen, T. ., Narazaki, K. ., Haeuchi, Y. ., Chen, S. ., Honda, T. . c, & Kumagai, S. . d. (2016). Associations of sedentary time and breaks in sedentary time with disability in instrumental activities of daily living in community-dwelling older adults. *Journal of Physical Activity and Health*, 13(3), 303–309. <https://doi.org/10.1123/jpah.2015-0090>
- Claridge, E. A. ., McPhee, P. G. ., Timmons, B. W. . c, Ginis, K. A. M. ., MacDonald, M. J. ., & Gorter, J. W. . (2015). Quantification of physical activity and sedentary time in adults with cerebral palsy. *Medicine and Science in Sports and Exercise*, 47(8), 1719–1726. <https://doi.org/10.1249/MSS.0000000000000589>
- Cooper, A. R. ., Sebire, S. ., Montgomery, A. A. ., Peters, T. J. . c, Sharp, D. J. ., Jackson, N. ., ... Andrews, R. C. . (2012). Sedentary time, breaks in sedentary time and metabolic variables in people with newly diagnosed type 2 diabetes. *Diabetologia*, 55(3), 589–599. <https://doi.org/10.1007/s00125-011-2408-x>
- Davis, M. G. ., Fox, K. R. ., Stathi, A. ., Trayers, T. ., Thompson, J. L. ., & Cooper, A. R. . (2014). Objectively measured sedentary time and its association with physical function in older adults. *Journal of Aging and Physical Activity*, 22(4), 474–481. <https://doi.org/10.1123/JAPA.2013-0042>
- Diaz, K. M., Howard, V. J., Hutto, B., Colabianchi, N., Vena, J. E., Blair, S. N., & Hooker, S. P. (2016). Patterns of Sedentary Behavior in US Middle-Age and Older Adults: The REGARDS Study. *Medicine and Science in Sports and Exercise*, 48(3), 430–438. <https://doi.org/10.1249/MSS.0000000000000792>
- Ezeugwu, V., Klaren, R. E., A Hubbard, E., Manns, P. T., & Motl, R. W. (2015). Mobility disability and the pattern of accelerometer-derived sedentary and physical activity behaviors in people with multiple sclerosis. *Preventive medicine reports*, 2, 241–6. <https://doi.org/10.1016/j.pmedr.2015.03.007>
- Falconer, C. L. ., Page, A. S. ., Andrews, R. C. ., & Cooper, A. R. . b. (2015). The Potential Impact of Displacing Sedentary Time in Adults with Type 2 Diabetes. *Medicine and Science in Sports and Exercise*, 47(10), 2070–2075. <https://doi.org/10.1249/MSS.0000000000000651>
- Fanning, J. ., Porter, G. ., Awick, E. A. ., Wójcicki, T. R. ., Gothe, N. P. ., Roberts, S. A. ., ... McAuley, E. . (2016). Effects of a DVD-delivered exercise program on patterns of sedentary behavior in older adults: A randomized controlled trial. *Preventive Medicine Reports*, 3, 238–243. <https://doi.org/10.1016/j.pmedr.2016.03.005>
- García-Hermoso, A. ., Martínez-Vizcaíno, V. ., Recio-Rodríguez, J. I. ., Sánchez-López, M. ., Gómez-Marcos, M. T. ., & García-Ortiz, L. . (2015). Sedentary behaviour patterns and carotid intima-media thickness in Spanish healthy adult population. *Atherosclerosis*, 239(2), 571–576. <https://doi.org/10.1016/j.atherosclerosis.2015.02.028>
- García-Hermoso, A. . p, Notario-Pacheco, B. ., Recio-Rodríguez, J. I. ., Martínez-Vizcaíno, V. ., Rodrigo de Pablo, E. ., Magdalena Belio, J. F. . o, ... Zuazagoitia, A. . (2015). Sedentary behaviour patterns and arterial stiffness in a Spanish adult population - The EVIDENT trial. *Atherosclerosis*, 243(2), 516–522. <https://doi.org/10.1016/j.atherosclerosis.2015.10.004>

## Pattern measures of sedentary behavior in adults: A literature review.

- Gardiner, P. A. ., Eakin, E. G. . b, Healy, G. N. . b, & Owen, N. . b. (2011). Feasibility of reducing older adults' sedentary time. *American Journal of Preventive Medicine*, *41*(2), 174–177. <https://doi.org/10.1016/j.amepre.2011.03.020>
- Gennuso, K. P. ., Gangnon, R. E. . c, Thraen-Borowski, K. M. ., & Colbert, L. H. . (2014). Dose–response relationships between sedentary behaviour and the metabolic syndrome and its components. *Diabetologia*, *58*(3), 485–492. <https://doi.org/10.1007/s00125-014-3453-z>
- Gupta, N., Heiden, M., Aadahl, M., Korshoj, M., Jorgensen, M. B., & Holtermann, A. (2016). What Is the Effect on Obesity Indicators from Replacing Prolonged Sedentary Time with Brief Sedentary Bouts, Standing and Different Types of Physical Activity during Working Days? A Cross-Sectional Accelerometer-Based Study among Blue-Collar Workers. *PLoS one*, *11*(5), e0154935–e0154935. <https://doi.org/10.1371/journal.pone.0154935>
- Hallman, D. M., Mathiassen, S. E., Gupta, N., Korshoj, M., & Holtermann, A. (2015). Differences between work and leisure in temporal patterns of objectively measured physical activity among blue-collar workers. *Bmc Public Health*, *15*, 976. <https://doi.org/10.1186/s12889-015-2339-4>
- Healy, G. N. . b, Matthews, C. E. ., Dunstan, D. W. . b, Winkler, E. A. H. ., & Owen, N. . b. (2011). Sedentary time and cardio-metabolic biomarkers in US adults: NHANES 200306. *European Heart Journal*, *32*(5), 590–597. <https://doi.org/10.1093/eurheartj/ehq451>
- Healy, G. N., Dunstan, D. W., Salmon, J., Cerin, E., Shaw, J. E., Zimmet, P. Z., & Owen, N. (2008). Breaks in sedentary time - Beneficial associations with metabolic risk. *Diabetes Care*, *31*(4), 661–666. <https://doi.org/10.2337/dc07-2046>
- Helgadóttir, B. ., Forsell, Y. ., & Ekblom, O. . (2015). Physical activity patterns of people affected by depressive and anxiety disorders as measured by accelerometers: A cross-sectional study. *PLoS ONE*, *10*(1). <https://doi.org/10.1371/journal.pone.0115894>
- Jefferis, B. J. . b, Parsons, T. J. . b, Sartini, C. . b, Ash, S. ., Lennon, L. T. ., Wannamethee, S. G. ., ... Whincup, P. H. . (2016). Does duration of physical activity bouts matter for adiposity and metabolic syndrome? A cross-sectional study of older British men. *International Journal of Behavioral Nutrition and Physical Activity*, *13*(1). <https://doi.org/10.1186/s12966-016-0361-2>
- Jefferis, B. J. . b, Sartini, C. ., Shiroma, E. ., Whincup, P. H. ., Wannamethee, S. G. ., & Lee, I.-M. . (2015). Duration and breaks in sedentary behaviour: Accelerometer data from 1566 community-dwelling older men (British Regional Heart Study). *British Journal of Sports Medicine*, *49*(24), 1591–1594. <https://doi.org/10.1136/bjsports-2014-093514>
- Júdice, P. B. ., Santos, D. A. ., Hamilton, M. T. ., Sardinha, L. B. ., & Silva, A. M. . (2015). Validity of GT3X and Actiheart to estimate sedentary time and breaks using ActivPAL as the reference in free-living conditions. *Gait and Posture*, *41*(4), 917–922. <https://doi.org/10.1016/j.gaitpost.2015.03.326>
- Judice, P. B., Silva, A. M., & Sardinha, L. B. (2015). Sedentary bout durations are associated with abdominal obesity in older adults. *Journal of Nutrition Health & Aging*, *19*(8), 798–804. <https://doi.org/10.1007/s12603-015-0501-4>
- Kim, Y. ., Barry, V. W. ., & Kang, M. . (2015). Validation of the ActiGraph GT3X and activPAL Accelerometers for the Assessment of Sedentary Behavior. *Measurement in Physical Education and Exercise Science*, *19*(3), 125–137. <https://doi.org/10.1080/1091367X.2015.1054390>

## Pattern measures of sedentary behavior in adults: A literature review.

- Kim, Y. ., Welk, G. J. ., Braun, S. I. ., & Kang, M. . (2015). Extracting objective estimates of sedentary behavior from accelerometer data: Measurement considerations for surveillance and research applications. *PLoS ONE*, *10*(2). <https://doi.org/10.1371/journal.pone.0118078>
- Leask, C. F., Harvey, J. A., Skelton, D. A., & Chastin, S. F. M. (2015). Exploring the context of sedentary behaviour in older adults (What, where, why, when and with whom). *European Review of Aging and Physical Activity*, *12*(1). <https://doi.org/10.1186/s11556-015-0146-7>
- Lord, S. ., Chastin, S. F. M. ., McInnes, L. ., Little, L. ., Briggs, P. ., & Rochester, L. . (2011). Exploring patterns of daily physical and sedentary behaviour in community-dwelling older adults. *Age and Ageing*, *40*(2), 205–210. <https://doi.org/10.1093/ageing/afq166>
- Lyden, K. ., Keadle, S. K. ., Staudenmayer, J. ., & Freedson, P. S. . (2014). A method to estimate free-living active and sedentary behavior from an accelerometer. *Medicine and Science in Sports and Exercise*, *46*(2), 386–397. <https://doi.org/10.1249/MSS.0b013e3182a42a2d>
- Lynch, B. M. . b c, Boyle, T. . e f, Winkler, E. ., Occleston, J. . h, Courneya, K. S. ., & Vallance, J. K. . (2016). Patterns and correlates of accelerometer-assessed physical activity and sedentary time among colon cancer survivors. *Cancer Causes and Control*, *27*(1), 59–68. <https://doi.org/10.1007/s10552-015-0683-4>
- Maddocks, M., & Wilcock, A. (2012). Exploring physical activity level in patients with thoracic cancer: Implications for use as an outcome measure. *Supportive Care in Cancer*, *20*(5), 1113–1116. <https://doi.org/10.1007/s00520-012-1393-z>
- Manns, P. ., Ezeugwu, V. ., Armijo-Olivo, S. ., Vallance, J. ., & Healy, G. N. . e f. (2015). Accelerometer-derived pattern of sedentary and physical activity time in persons with mobility disability: National Health and Nutrition Examination Survey 2003 to 2006. *Journal of the American Geriatrics Society*, *63*(7), 1314–1323. <https://doi.org/10.1111/jgs.13490>
- Ortlieb, S., Dias, A., Gorzelnik, L., Nowak, D., Karrasch, S., Peters, A., ... Schulz, H. (2014). Exploring patterns of accelerometry-assessed physical activity in elderly people. *The international journal of behavioral nutrition and physical activity*, *11*(1), 28–28. <https://doi.org/10.1186/1479-5868-11-28>
- Paraschiv-Ionescu, A. ., Perruchoud, C. . c, Buchser, E. . c, & Aminian, K. . (2009). Multidimensional analysis of human activity patterns in health and disease. In *Proceedings of the 2nd IASTED International Conference on Telehealth and Assistive Technology, TAT 2009* (pp. 31–36). Cambridge, MA. Geraadpleegd van <http://www.scopus.com/inward/record.url?eid=2-s2.0-77952360201&partnerID=40&md5=4aaf8d1aafb0ebd459efb40fa2044db3>
- Paraschiv-Ionescu, A., Buchser, E., Rutschmann, B., & Aminian, K. (2008). Nonlinear analysis of human physical activity patterns in health and disease. *Physical Review E*, *77*(2), 021913. <https://doi.org/10.1103/PhysRevE.77.021913>
- Parry, S. ., Straker, L. ., Gilson, N. D. ., & Smith, A. J. . (2013). Participatory workplace interventions can reduce sedentary time for office workers - A randomised controlled trial. *PLoS ONE*, *8*(11). <https://doi.org/10.1371/journal.pone.0078957>
- Parry, S., & Straker, L. (2013). The contribution of office work to sedentary behaviour associated risk. *BMC Public Health*, *13*(1). <https://doi.org/10.1186/1471-2458-13-296>
- Pettapiece-Phillips, R. . b, Kotlyar, M. ., Chehade, R. ., Salmena, L. . d, Narod, S. A. . b e, Akbari, M. . e, ... Kotsopoulos, J. . b e. (2016). Uninterrupted sedentary behavior downregulates BRCA1 gene

## Pattern measures of sedentary behavior in adults: A literature review.

- expression. *Cancer Prevention Research*, 9(1), 83–88. <https://doi.org/10.1158/1940-6207.CAPR-15-0291>
- Prince, S. A. ., Blanchard, C. M. ., Grace, S. L. ., & Reid, R. D. . (2015). Objectively-measured sedentary time and its association with markers of cardiometabolic health and fitness among cardiac rehabilitation graduates. *European Journal of Preventive Cardiology*, 23(8), 818–825. <https://doi.org/10.1177/2047487315617101>
- Prioreschi, A. ., Makda, M. A. ., Tikly, M. ., & McVeigh, J. A. . (2015). Habitual Physical Activity, Sedentary Behaviour and Bone Health in Rheumatoid Arthritis. *International Journal of Sports Medicine*, 36(12), 1021–1026. <https://doi.org/10.1055/s-0035-1550049>
- Reid, N., Eakin, E., Henwood, T., Keogh, J. W. L., Senior, H. E., Gardiner, P. A., ... Healy, G. N. (2013). Objectively Measured Activity Patterns among Adults in Residential Aged Care. *International Journal of Environmental Research and Public Health*, 10(12), 6783–6798. <https://doi.org/10.3390/ijerph10126783>
- Reid, R. E. R. ., Carver, T. E. ., Andersen, K. M. ., Court, O. ., & Andersen, R. E. . (2015). Physical Activity and Sedentary Behavior in Bariatric Patients Long-Term Post-Surgery. *Obesity Surgery*, 25(6), 1073–1077. <https://doi.org/10.1007/s11695-015-1624-8>
- Sardinha, L. B. . c, Santos, D. A. ., Silva, A. M. ., Baptista, F. ., & Owen, N. . (2015). Breaking-up sedentary time is associated with physical function in older adults. *Journals of Gerontology - Series A Biological Sciences and Medical Sciences*, 70(1), 119–124. <https://doi.org/10.1093/gerona/glu193>
- Sardinha, L. B., Ekelund, U., dos Santos, L., Cyrino, E. S., Silva, A. M., & Santos, D. A. (2015). Breaking-up sedentary time is associated with impairment in activities of daily living. *Experimental Gerontology*, 72, 57–62. <https://doi.org/10.1016/j.exger.2015.09.011>
- Sartini, C., Wannamethee, S. G., Iliffe, S., Morris, R. W., Ash, S., Lennon, L., ... Jefferis, B. J. (2015). Diurnal patterns of objectively measured physical activity and sedentary behaviour in older men. *Bmc Public Health*, 15, 609. <https://doi.org/10.1186/s12889-015-1976-y>
- Scheers, T. . b, Philippaerts, R. ., & Lefevre, J. . (2012). Variability in physical activity patterns as measured by the SenseWear Armband: How many days are needed? *European Journal of Applied Physiology*, 112(5), 1653–1662.
- Shiroma, E. J., Freedson, P. S., Trost, S. G., & Lee, I.-M. (2013a). Patterns of Accelerometer-Assessed Sedentary Behavior in Older Women. *Jama-Journal of the American Medical Association*, 310(23), 2562–2563. <https://doi.org/10.1001/jama.2013.278896>
- Shiroma, E. J., Freedson, P. S., Trost, S. G., & Lee, I.-M. (2013b). Patterns of Accelerometer-Assessed Sedentary Behavior in Older Women. *Medicine and Science in Sports and Exercise*, 45(5), 102–102.
- Spinney, R. ., Smith, L. ., Ucci, M. ., Fisher, A. ., Konstantatou, M. ., Sawyer, A. ., ... Marmot, A. . (2015). Indoor tracking to understand physical activity and sedentary behaviour: Exploratory study in UK office buildings. *PLoS ONE*, 10(5). <https://doi.org/10.1371/journal.pone.0127688>
- Straker, L., Campbell, A., Mathiassen, S. E., Abbott, R. A., Parry, S., & Davey, P. (2014). Capturing the Pattern of Physical Activity and Sedentary Behavior: Exposure Variation Analysis of Accelerometer Data. *Journal of Physical Activity & Health*, 11(3), 614–625. <https://doi.org/10.1123/jpah.2012-0105>

## Pattern measures of sedentary behavior in adults: A literature review.

- Tieges, Z. . b, Mead, G. . b, Allerhand, M. . c, Duncan, F. . , Van Wijck, F. . , Fitzsimons, C. . , ... Chastin, S. . (2015). Sedentary behavior in the first year after stroke: A longitudinal cohort study with objective measures. *Archives of Physical Medicine and Rehabilitation*, *96*(1), 15–23. <https://doi.org/10.1016/j.apmr.2014.08.015>
- Van Cauwenberg, J. . b c, Van Holle, V. . d, De Bourdeaudhuij, I. . , Owen, N. . , & Deforche, B. . b. (2015). Diurnal patterns and correlates of older adults' sedentary behavior. *PLoS ONE*, *10*(8). <https://doi.org/10.1371/journal.pone.0133175>
- van der Berg, J. D. . b, Stehouwer, C. D. A. . d, Bosma, H. . b, van der Velde, J. H. P. M. . e f, Willems, P. J. B. . f, Savelberg, H. H. C. M. . f, ... Koster, A. . b. (2016). Associations of total amount and patterns of sedentary behaviour with type 2 diabetes and the metabolic syndrome: The Maastricht Study. *Diabetologia*, *59*(4), 709–718. <https://doi.org/10.1007/s00125-015-3861-8>
- Van Dommelen, P. . , Coffeng, J. K. . c, Van Der Ploeg, H. P. . d, Van Der Beek, A. J. . c, Boot, C. R. L. . c, & Hendriksen, I. J. M. . c. (2016). Objectively measured total and occupational sedentary time in three work settings. *PLoS ONE*, *11*(3). <https://doi.org/10.1371/journal.pone.0149951>
